1           **Environmental DNA analysis needs local reference data to**  
2           **inform taxonomy-based conservation policy – A case study**  
3           **from Aotearoa / New Zealand**

4 Paul Czechowski<sup>1a\*</sup>, Michel de Lange<sup>2,3,b</sup> Michael Heldsinger<sup>4c</sup>, Will Rayment<sup>4,5d</sup>,  
5 Christopher Hepburn<sup>4,5e</sup>, Monique Ladds<sup>6f</sup>, and Michael Knapp<sup>1,5g</sup>

6 <sup>1</sup>Department of Anatomy, University of Otago, PO Box 56, Dunedin 9054, Aotearoa /  
7 New Zealand; <sup>2</sup>Biostatistics Centre, University of Otago, PO Box 56, Dunedin 9054,  
8 Aotearoa / New Zealand; <sup>3</sup>Pacific Edge, 87 Saint David Street, Dunedin 9016, Aotearoa /  
9 New Zealand; <sup>4</sup>Department of Marine Science, University of Otago, PO Box 56, Dunedin  
10 9054, Aotearoa / New Zealand <sup>5</sup>Coastal People Southern Skies Centre of Research  
11 Excellence, University of Otago, PO Box 56, Dunedin 9054, Aotearoa / New Zealand;  
12 <sup>6</sup>Department of Conservation PO Box 10 420, Wellington 6143, Aotearoa / New Zealand.

13 [paul.czechowski@otago.ac.nz](mailto:paul.czechowski@otago.ac.nz); [michel.delange@posteo.nz](mailto:michel.delange@posteo.nz);

14 [michael.heldsinger@gmail.com](mailto:michael.heldsinger@gmail.com); [will.rayment@otago.ac.nz](mailto:will.rayment@otago.ac.nz);

15 [chris.hepburn@otago.ac.nz](mailto:chris.hepburn@otago.ac.nz); [mladds@doc.govt.nz](mailto:mladds@doc.govt.nz); [michael.knapp@otago.ac.nz](mailto:michael.knapp@otago.ac.nz)

16 **Running title:** eDNA in marine reserves of Aotearoa

17 **Keywords:** BRUV, conservation, fish, environmental DNA, marine reserve, visual  
18 survey, sharks

19 **Article Type:** Perspectives

20 **Number of words:** 3195 (Introduction up to and including Acknowledgements)

21 **Number of references:** 29

22 **Number of Figures and Tables:** 4 + 1

23 **Corresponding Author:** Paul Czechowski, Department of Anatomy, University of  
24 Otago, PO Box 56, Dunedin 9054, Aotearoa / New Zealand;  
25 [paul.czechowski@otago.ac.nz](mailto:paul.czechowski@otago.ac.nz); Phone +64 021 024 91263

## 26 **Abstract**

27 Effective management of biodiversity requires regular surveillance of multiple species.  
28 Analysis of environmental DNA by metabarcoding (eDNA) holds promise to achieve this  
29 relatively easily. However, taxonomic inquiries into eDNA data need suitable molecular  
30 reference data, which are often lacking. We evaluate the impact of this reference data void in  
31 a case study of fish diversity in the remote fiords of New Zealand. We compared eDNA-  
32 derived species identifications against Baited Remote Underwater Video (BRUV) data  
33 collected at the same time and locations as the eDNA data. Furthermore, we cross referenced  
34 both eDNA and BRUV data against species lists for the same region obtained from literature  
35 surveys and the Ocean Biodiversity Information System (OBIS). From all four data sources,  
36 we obtained a total of 116 species records (106 ray-finned fishes, 10 cartilaginous fishes; 59  
37 from literature, 44 from eDNA, 25 from BRUV, 25 from OBIS). Concordance of taxonomies  
38 between the data sources dissolved with lowering taxonomic levels, most decisively so for  
39 eDNA data. BRUV agreed with local biodiversity information much better and fared better in  
40 detecting regional biodiversity dissimilarities. We provide evidence that eDNA  
41 metabarcoding will remain a powerful but impaired tool for species-level biodiversity  
42 management without locally generated reference data.

## 43 **Introduction**

44 Marine reserve (MR) networks conserve biodiversity by stabilizing communities and  
45 maintaining food web structure (Wing & Jack, 2013). Effective management of MR  
46 biodiversity requires regular surveillance, for example to avoid overexploitation by fishing  
47 (Wing & Jack, 2013), or to avoid damage through influx of non-indigenous species  
48 (Cunningham, 2019). Fish surveillance is of particular interest due to their sensitivity to most  
49 forms of human disturbance, their usefulness at all levels of biological organization, and the  
50 favourable benefit-to-cost ratio of fish assessment programmes (Harris, 1995).

51 Analysis of environmental DNA (eDNA) metabarcoding data is a well-established molecular  
52 technique for multispecies surveys (Cristescu & Hebert, 2018). Environmental DNA  
53 metabarcoding holds promise for biodiversity surveys intended to inform biodiversity  
54 management – associated techniques are regarded more cost-efficient than traditional  
55 methods (such as baited remote underwater video surveys – BRUV), less dependent on expert  
56 taxonomic knowledge, can be standardized, and are able to inform on a broad range of taxa  
57 (Sigsgaard et al., 2020).

58 Reliable low-level taxonomic annotation is a prerequisite for useful biodiversity management  
59 and biological surveillance (e.g., Jack & Wing 2013). For example, in a southern New  
60 Zealand context, *Parapercis colias* (blue cod) is of high commercial interest, but three other  
61 of the 79 cod species are known from New Zealand (Roberts et al., 2019), so that genus  
62 information alone is ambiguous for determining blue cod presence or absence. Accordingly,  
63 higher-level taxonomic classifications (e.g., family, and order levels) are even less  
64 informative for species level conservation management. This reality translates into the desire  
65 for obtaining perfect 100 bp to 200 bp alignments (Huson et al. 2007) between an unknown  
66 eDNA-derived query sequence and a well described reference sequence derived from a valid  
67 species. In practice, absence of such reference data necessitates relaxation of taxonomy-  
68 assigning alignment parameters to retain sufficient eDNA data for analysis, and in  
69 consequence the data's informative quality suffers.

70 Availability of suitable reference data for metabarcoding is highly variable depending on  
71 taxonomic groups and geographic locations, with fish considered relatively well covered in  
72 Barcode of Life Data Systems (BOLD) and NCBI's GenBank (Benson et al. 2011) for some  
73 regions such as Europe (Weigand et al., 2019). Arguably, fewer reference data are available  
74 for fish of southern New Zealand. For example, for six commonly used 12S primer pairs,  
75 recognized as well suitable for fish multispecies surveys (Weigand et al., 2019), an average  
76 of 36% of all northern European fish species are available as reference data, but only 26% of  
77 southern New Zealand species (GAPeDNA v1.0.1 web interface, 11-Sep-2021; Marques et  
78 al. 2021; also see SI Table 1).

79 In this study, we evaluate the impact of taxonomic data limitations on multispecies surveys  
80 using the example of fish in the UNESCO World Heritage Site Te Wahipounamu (Fiordland)  
81 in southern New Zealand. We compare the results of concurrent eDNA and BRUV surveys  
82 and cross-reference these data against species lists for the same region obtained from  
83 literature and the Ocean Biodiversity Information System (OBIS). The fish diversity of Te  
84 Wahipounamu has been described based on a diverse range of mostly visual methods. If our  
85 BRUV and eDNA approaches work optimally, we should see a strong overlap between these  
86 field data and previously described fish diversity records of the region.

## 87 **Methods**

88 For this study, we evaluated the presence of Actinopterygii (ray-finned fishes) and  
89 Chondrichthyes (cartilaginous fishes) species in one MR, two commercial exclusion zones

90 (all “MR”), and corresponding control areas in southern Te Wahipounamu, New Zealand  
91 (west coast, approximately from -44.3 to -46.25 Southern latitude; Fig. 1a). We obtained and  
92 analysed eDNA and BRUV data as well as electronic records proximate to the field work  
93 area from the Ocean Biodiversity Information System (OBIS; Ausubel 1999). Furthermore, a  
94 reference list of ray-finned fishes and cartilaginous fishes that have been observed in  
95 Fiordland was assembled from literature. All observations were formalized using NCBI  
96 taxonomy (Federhen, 2012), including trivial names, and limited to classes Actinopterygii  
97 and Chondrichthyes.

98 Literature data, itself obtained using various methods, were extracted from five sources,  
99 including one meta-analysis (SI Table 2). OBIS data were downloaded for a 38 km radius  
100 around all field work sites (centre point W 166.89°, S -45.80°), as well as for smaller areas  
101 surrounding individual field work sites, (2.5 km radius; Fig. 1a).

102 For a detailed description of field and laboratory work please refer to SI. For eDNA  
103 collection and BRUV filming we visited three locations in southern Te Wahipounamu  
104 (Moana Uta / Wet Jacket Arm, Taumoana / Five Fingers, and Te Tapuwae a Hua / Long  
105 Sound; henceforth WJ MR, FF MR, and LS MR), and accompanying control areas outside  
106 those MRs (henceforth WJ CTRL, FF CTRL, and LS CTRL), from 12.–22. December 2019  
107 (Fig. 1a.) Within each sampling location, at randomised sites, we collected eDNA (mean  
108 depth 14.05 m, med.: 15, sd.: 1.4 m), and subsequently deployed BRUV assemblies (mean  
109 depth 15.6 m, med.: 16, sd.: 2.6 m; SI). We considered data from 21 sites (FF: 2 FF MR and  
110 3 FF CTRL, WJ: 4 WJ MR and 4 WJ CTRL, and LS: 4 LS MR and 4 LS CTRL). We  
111 collected two 900 ml water samples with eDNA at each site, filtered them alongside negative  
112 controls, then sealed and stored them until further processing. BRUV footage was obtained  
113 for one hour and analysed by eye.

114 Environmental DNA was isolated in a PCR-free facility alongside extraction and cross-  
115 contamination controls (SI: four species of tropical freshwater fish). After *in silico* PCR (SI),  
116 we amplified our extracts with the well-established and widely used 12S MiFish primers  
117 (“MiFish-U”; Miya et al. 2015; see SI Table 1 for primer comparison), targeting  
118 Actinopterygii. Chondrichthyes were targeted with slightly altered derivatives (“Elas02”,  
119 Taberlet et al. 2018). Our single-step PCRs were cycled 45 times, with annealing  
120 temperatures of 45 °C (MiFish-U) or 40 °C (Elas02). Amplified eDNA was then pooled,  
121 visualised, purified, combined equimolarly, diluted to 4.5 pmol, and sequenced on an  
122 Illumina MiSeq (Illumina, San Diego, US-CA; kit v2, 300 cycles, single-ended).

123 We defined Amplicon Sequence Variants (ASVs; Callahan et al. 2017) from eDNA after  
124 demultiplexing with Cutadapt v3.0 (Martin, 2011), using Qiime2 2020-08 (Bolyen et al.,  
125 2019) and DADA2 1.10.0 (Callahan et al., 2016). To yield high quality sequence data we did  
126 not allow any mismatches, nor Expected Errors (Edgar & Flyvbjerg, 2015) during  
127 demultiplexing. Taxonomic annotation of denoised data was obtained using Blast 2.10.0+  
128 (Camacho et al., 2009) and a local full copy of the NCBI nucleotide collection (April 2020;  
129 Benson et al., 2011) while excluding environmental samples. To yield a maximum of  
130 taxonomically annotated ASVs, we chose relaxed taxonomic assignment parameters in  
131 combination with an e-value to retain only the most significant alignments. We required a  
132 minimum identity of 75% among all alignments and kept five high-scoring pairs for each  
133 eDNA query, each of which needed a minimum coverage of 95% to be retained. The minimal  
134 acceptable e-value was set to  $10^{-10}$ . We retained the best high-scoring alignment of each  
135 query-reference pair based on the highest bit score. We removed data contained in negative  
136 controls, alongside ASVs covered by fewer than 15 reads (see SI).

137 To investigate how well the literature- and OBIS-derived biodiversity information were  
138 resolved by eDNA and BRUV, we checked the concordance of all data sources on order,  
139 family, genus and on species levels. To judge sampling effort and total species diversity  
140 based on BRUV and eDNA observations, we inspected species accumulation curves and  
141 calculated Good Turing estimators (giving the number of all species based on species already  
142 seen in a small sample; Good, 1953), and then compared those values to combined Te  
143 Wahipounamu literature and OBIS species records.

144 To verify the credibility of eDNA information, we checked all eDNA species lists against a  
145 comprehensive list of all New Zealand fish (Roberts et al., 2019) and evaluated species  
146 assignment and alignment qualities.

147 To investigate how useful BRUV, eDNA and OBIS records are in detecting regional  
148 differences between fish biodiversity, we used Analysis of Similarity (ANOSIM; Clarke  
149 1993). Thereby analysing Jaccard distances (Jaccard, 1912), we looked for significant  
150 differences in taxon (species, genus, family, order) overlap depending on various factor  
151 combinations, hence checking whether a particular observation method fared better in  
152 detecting taxon composition differences either between different field work areas (WJ, FF,  
153 LS), or according to protection status (MR or CNTRL).

## 154 Results

155 Each of our four data sources yielded different species counts. In total, we yielded 116  
156 species (106 Actinopterygii, 10 Chondrichthyes), comprised of 59 species from previously  
157 published Te Wahipounamu works, 44 unique species derived from eDNA, 25 from BRUV  
158 and 25 from OBIS (large area; see Table 1, Fig. 2, SI. Table 4). While 21 field work sites  
159 (Fig. 1a) yielded environmental DNA and BRUV data (Fig. 1b, c) matching local OBIS data  
160 could only be obtained for nine field work sites (Fig. 1a, small circles, LS CNTRL, FF, WJ),  
161 and hence those finer scaled OBIS data were later excluded from ANOSIM as incomplete  
162 data (Fig. 1a, small circles, Fig. 1d). For further comparisons with Good-Turing estimates, we  
163 posit the local “real” species count to 68 as the number of unique species observed across  
164 literature and OBIS (Fig. 3).

165 Obtaining community composition comparable to literature and OBIS data within our works’  
166 spatial constraints worked better with BRUV than with eDNA. Nineteen out of 25 species  
167 detected with BRUV (76%) were contained in the literature or on OBIS, but only one out of  
168 44 species detected with eDNA (2%) were contained in Te Wahipounamu-specific literature  
169 or OBIS (Fig. 1a, large circle). Concordance of taxonomic information between the four data  
170 sources dissolved with lowering taxonomic levels, and most decisively for eDNA data (Fig.  
171 3). At species level, only two taxonomic assignments from eDNA matched other data  
172 sources, namely *Notorynchus cepedianus* (broadnose sevengill shark), also found with  
173 BRUV, and *Aldrichetta forsteri* (yellow-eye mullet) also listed in the literature (Fig. 2).  
174 BRUV agreed better with available local biodiversity information, with 11 species mentioned  
175 both in the literature and OBIS, and eight detected species mentioned in the literature only  
176 (Fig. 3). On BRUV we identified six species (*Bodianus unimaculatus*, *Chelidonichthys kumu*,  
177 *Galeorhinus galeus*, *Mustelus lenticulatus*, *Notorynchus cepedianus*, *Scorpaena cardinalis*)  
178 not mentioned in literature, and not in OBIS, but occurring in New Zealand waters (Roberts  
179 et al., 2019). While our plateauing species accumulation curves suggested exhaustive  
180 sampling (SI Fig. 5), Good-Turing estimates of eDNA data inferred a presence of 60 species  
181 in the study area (assuming 27% missed after 44 observations), and a presence of 26 species  
182 using BRUV (assuming 7% missed after 25 observations).

183 Alignment qualities associated with taxonomic annotation of eDNA data were variable.  
184 Forty-four species assigned among eDNA were defined by 92 ASVs (across 142  
185 observations) of which only six yielded flawless alignments with reference data (i.e. 14%,  
186 with full query coverage, no alignment gaps). Eighty-six ASVs had variable query coverage

187 (37 families, Tab. 1 and SI), while 32 ASVs had variable gap counts (15 families, Tab. 1 and  
188 SI). Mean query coverage was 93.2% (min: 78.6%, med: 97%, sd 6.5%), mean gap count was  
189 1 (max: 10, med: 0, sd 1.83; Tab. 1). Nineteen species assignments among eDNA (43%) had  
190 not been observed in New Zealand, and none of these species were found using BRUV,  
191 across literature, or OBIS data (apart from *Bovichtus variegatus* – thornfish, not in Roberts et  
192 al., 2019, but in Roberts, 2005; Fig. 2). Importantly, 25 species observed with eDNA (56.8%  
193 of eDNA-observed species) were known from somewhere New Zealand (Roberts et al., 2019)  
194 but were not observed in BRUV or found in Te Wahipounamu literature. Interestingly, using  
195 eDNA, we obtained perfect alignments between few ASVs and reference data for  
196 *Arctocephalus forsteri* (New Zealand fur seal), *Balaenoptera musculus* (blue whale), and  
197 *Tursiops truncatus* (bottlenose dolphin).

198 In ANOSIM, only BRUV data, and not eDNA data, exhibited location-specific differences  
199 among species' presence overlaps among the 21 sites – on species, genus, family, and order  
200 levels. Significant differences were calculated in overlaps between the six field work areas  
201 but not between marine reserve nor control areas (SI Table 3).

202 Investigation of the strikingly homogenous structure of eDNA data by regression analysis of  
203 the 142 non-unique eDNA observations (Tjur's  $R^2$  0.027) suggested each additional  
204 alignment gap to be associated with a 39% increased probability of observing a non-native  
205 species (Odds Ratio 1.39, 95% CI from 1.19 to 1.66,  $p < 0.01$ ). A 1% increase in alignment  
206 concordance was associated with a 7% increased probability of non-native observation (OR  
207 1.07, 95% CI 1.03–1.12,  $p < 0.01$ ). Null deviance was 572.60 on 141 degrees of freedom,  
208 residual deviance was 552.31 on 139 degrees of freedom (SI Figs 7 and 8).

## 209 **Discussion**

210 What is a realistic estimate of the fish biodiversity in Te Wahipounamu? Based on literature  
211 and OBIS alone, we estimate the currently described combined ray-finned and cartilaginous  
212 fish species count of Te Wahipounamu to be 68, minding that we constrained OBIS data to  
213 surround field sites (Fig. 1, large circle), and that those data are predominantly based on  
214 visual observations (SI Table 2). If species counts obtained from literature and OBIS were  
215 close to a real value of 68, and the same was true for eDNA and BRUV data, both respective  
216 Good-Turing estimates would be 68. Our BRUV-based Good-Turing estimate of 26 species  
217 diverges strongly from this number. This may have several reasons. Firstly, we only  
218 inspected an isolated area in Te Wahipounamu, while the literature describes a larger area.

219 Secondly, bait in BRUV does not attract all fish for the camera, particularly if deployed at  
220 limited depth range, as done here. For eDNA, the Good-Turing estimate of 60 species is more  
221 like the literature-inferred species count, but this could be coincidental.

222 How credible are eDNA derived species assignments with currently available reference data?  
223 We believe lacking eDNA reference data to restrict accurate species annotation of ASVs.  
224 There are several observations from our data that appear to support this hypothesis. First,  
225 while there is a reasonably good concordance between species identified in our BRUV  
226 analyses and species known from the area as combined from publications and OBIS, the  
227 dissimilarity between eDNA data on one side, and BRUV, OBIS and publication data on the  
228 other side, increases with decreasing taxonomic level, culminating in only two out of 44  
229 eDNA species being either identified in our BRUV analyses or known from previous  
230 publications (Fig. 3).

231 Secondly, every approach to identify species diversity in a marine ecosystem has its biases,  
232 and published observations are mostly based on visual approaches. Thus, one could argue for  
233 the existence of a bias favouring similarity between our visual BRUV observations and  
234 published species occurrences to the detriment of eDNA data's similarity. However, we do  
235 not believe this circumstance alone to be responsible for a bias favouring BRUV data to be  
236 more similar with literature and OBIS observations in comparison to eDNA observations.  
237 Literature and OBIS observation methodologies extend well beyond the specific biases of  
238 BRUV, including a multitude of different observation techniques (poison stations, seine net  
239 fishing, spear fishing, diver surveys and others, SI Table 1). Collectively, all observation  
240 techniques should have provided an appropriately comprehensive overview of fish diversity  
241 in Te Wahipounamu, lacking biases inherent to BRUV.

242 Thirdly, some divergence between eDNA data and the other data sources may be explained  
243 by the known ability of eDNA to detect “cryptic” species that are not easily discovered by  
244 any visual surveying. The most obvious candidates for this category would be the 25 eDNA  
245 species that had previously been reported from New Zealand but not yet from Te  
246 Wahipounamu (Fig. 2). However, such a bias should not prevent a broad overlap between  
247 eDNA and visual approaches for species that can easily be detected visually. Clearly, we did  
248 not find such an overlap.

249 Crucially, of the 25 species we detected by BRUV and that were therefore present at the time  
250 of our concurrent water sampling for eDNA analyses, 24 species are not present in the NCBI



251 reference database (Fig. 2) and could therefore not be detected by our eDNA approach. This  
252 highlights one of the main limitations of eDNA multispecies surveys today.

253 Nevertheless, and despite the lack of reference data, eDNA still identified a larger number of  
254 species than our concurrent BRUV analyses. From where do these species assignments  
255 come? In most cases during taxonomic assignment, where no perfect match can be found  
256 between eDNA query and reference subject sequence, the algorithm assigning ASVs to  
257 species information (BLAST) chose the next-closest matching species contained in the  
258 reference data collection, as encouraged by our taxonomic assignment parameters. Our  
259 taxonomic assignments correspond with this hypothesis, as binomial regression showed that  
260 each additional gap in a sequences' reference alignment associated with a 39% increased  
261 probability of observing of a non-native species.

262 Interestingly, a 1% increase in alignment concordance increased the likelihood of a non-  
263 native observation as well, by 7%. At first sight this seems counter-intuitive, however the  
264 latter observation is also consistent with our hypothesis: A poorly matching sequence would  
265 not be assigned to a matching species but rather to a higher matching taxon such as genus or  
266 family. A better fit increases the likelihood of a species level assignment, but without native  
267 species contained among reference data, the likelihood increases that the query sequence is  
268 assigned to a closely related species not occurring in New Zealand. Similar observations have  
269 been made in other regions of the world (Stoeckle, Das Mishu, & Charlop-Powers, 2020).

270 The large number of species detected by our eDNA approach – although probably  
271 misassigned in several instances – is a testament to the potential power of eDNA methods.  
272 Arguably, any detected effect of lacking reference data could be less pronounced by using  
273 another, or multiple primer pairs. For example, our primer evaluations with the recently  
274 released software GAPeDNA (Marques et al., 2021) show that the “Fish 16S” primer set by  
275 McInnes et al. (2017) would have covered 249 instead of the 119 New Zealand marine fish  
276 species covered by our MiFish 12S dataset (SI Table 1). However, the overall conclusion  
277 remains. Of the over 1294 known New Zealand marine fish species, molecular reference data  
278 of any kind is available only for 489 species in southern New Zealand, and for no available  
279 primer pairs sufficient reference data is available. Hence without substantial effort into  
280 generating suitable reference data for a carefully selected range of similar primers, eDNA  
281 analysis here and everywhere else will remain an impaired tool for biodiversity management.  
282 While this insight holds true after almost two decades of eDNA research (Hebert, Cywinska,  
283 Ball, & DeWaard, 2003) we note that a growing number of researchers are working hard on

284 closing reference data voids around the globe (reviewed in Marques et al., 2021; Weigand et  
285 al., 2019).

## 286 **Acknowledgments and Data**

287 Funded in part by the New Zealand Department of Conservation. Authors were supported by  
288 the University of Otago. Authorship determination followed the Contributor Roles Taxonomy  
289 (<https://casrai.org/credit>). P.C. lead field, lab and analysis work and wrote manuscript. M.d.L.  
290 provided Good-Turing estimates, accumulation curves and advised P.C. M.H., M.L., P.C.  
291 obtained, and M.H. viewed BRUV footage. M.H. aided DNA extraction. W.R., C.H., M.K.  
292 obtained funding. Everyone contributed to manuscript revision. We appreciate Olga  
293 Kardailsky for obtaining deceased aquarium fish, and Anya Kardailsky for helping water  
294 filtering (both University of Otago). Sequencing was undertaken by Otago Genomics. Data  
295 and code generated for this work are archived at <https://doi.org/10.5281/zenodo.4638297>.

## 296 **References**

- 297 Ausubel, J. (1999). Toward a Census of Marine Life. *Oceanography*, 12(3), 4–5. doi:  
298 10.5670/oceanog.1999.17
- 299 Benson, D. a, Karsch-Mizrachi, I., Lipman, D. J., Ostell, J., & Sayers, E. W. (2011).  
300 GenBank. *Nucleic Acids Research*, 39(Database issue), D32-7. doi:  
301 10.1093/nar/gkq1079
- 302 Bolyen, E., Rideout, J. R., Dillon, M. R., Bokulich, N. A., Abnet, C. C., Al-Ghalith, G. A., ...  
303 Caporaso, J. G. (2019). Reproducible, interactive, scalable and extensible microbiome  
304 data science using QIIME 2. *Nature Biotechnology*, 37(8), 852–857. doi:  
305 10.1038/s41587-019-0209-9
- 306 Callahan, B. J., McMurdie, P. J., & Holmes, S. P. (2017). Exact sequence variants should  
307 replace operational taxonomic units in marker-gene data analysis. *The ISME Journal*,  
308 11(12), 113597. doi: 10.1038/ismej.2017.119

- 309 Callahan, B. J., McMurdie, P. J., Rosen, M. J., Han, A. W., Johnson, A. J. A., & Holmes, S.  
310 P. (2016). DADA2: High-resolution sample inference from Illumina amplicon data.  
311 *Nature Methods*, *13*(7), 581–583. doi: 10.1038/nmeth.3869
- 312 Camacho, C., Coulouris, G., Avagyan, V., Ma, N., Papadopoulos, J., Bealer, K., & Madden,  
313 T. L. (2009). BLAST+: Architecture and applications. *BMC Bioinformatics*, *10*(1),  
314 421. doi: 10.1186/1471-2105-10-421
- 315 Clarke, K. R. (1993). Non-parametric multivariate analyses of changes in community  
316 structure. *Austral Ecology*, *18*(1), 117–143. doi: 10.1111/j.1442-9993.1993.tb00438.x
- 317 Cristescu, M. E., & Hebert, P. D. N. (2018). Uses and Misuses of Environmental DNA in  
318 Biodiversity Science and Conservation. *Annual Review of Ecology, Evolution, and*  
319 *Systematics*, *49*(1), 209–230. doi: 10/gfkkjq
- 320 Cunningham, S. (2019). Mitigating the threat of invasive marine species to Fiordland: New  
321 Zealand’s first pathway management plan. *Management of Biological Invasions*,  
322 *10*(4), 690–708. doi: 10.3391/mbi.2019.10.4.07
- 323 Edgar, R. C., & Flyvbjerg, H. (2015). Error filtering, pair assembly and error correction for  
324 next-generation sequencing reads. *Bioinformatics*, *31*(21), 3476–3482. doi:  
325 10.1093/bioinformatics/btv401
- 326 Federhen, S. (2012). The NCBI Taxonomy database. *Nucleic Acids Research*, *40*(D1), D136–  
327 D143. doi: 10/c452q3
- 328 Good, I. J. (1953). The Population Frequencies of Species and the Estimation of Population  
329 Parameters. *Biometrika*, *40*(3/4), 237. doi: 10/d7kccb
- 330 Harris, J. H. (1995). The use of fish in ecological assessments. *Austral Ecology*, *20*(1), 65–80.  
331 doi: 10/d2pq6f

- 332 Hebert, P. D. N., Cywinska, A., Ball, S. L., & DeWaard, J. R. (2003). Biological  
333 identifications through DNA barcodes. *Proceedings of the Royal Society B:*  
334 *Biological Sciences*, 270(1512), 313–321. doi: 10/fnjqv7
- 335 Huson, D. H., Auch, A. F., Qi, J., & Schuster, S. C. (2007). MEGAN analysis of  
336 metagenomic data. *Genome Research*, 17(3), 377–386. doi: 10.1101/gr.5969107
- 337 Inglis, G., MAF Biosecurity New Zealand, Post-border Directorate, & MAF Biosecurity New  
338 Zealand. (2008). *Milford Sound: First baseline survey for non-indigenous marine*  
339 *species (research project ZBS2005/19)*. Wellington, N.Z.: MAF Biosecurity New  
340 Zealand. Retrieved from [https://niwa.co.nz/static/marine-](https://niwa.co.nz/static/marine-biosecurity/Inglis%20et%20al%202008%20milford%20resurvey%20report.pdf)  
341 [biosecurity/Inglis%20et%20al%202008%20milford%20resurvey%20report.pdf](https://niwa.co.nz/static/marine-biosecurity/Inglis%20et%20al%202008%20milford%20resurvey%20report.pdf)
- 342 Jaccard, P. (1912). The distribution of the flora in the Alpine zone. *New Phytologist*, 11(2),  
343 37–50. doi: 10/fvhsjd
- 344 Jack, L., & Wing, S. R. (2013). A safety network against regional population collapse:  
345 Mature subpopulations in refuges distributed across the landscape. *Ecosphere*, 4(5),  
346 57. doi: 10.1890/ES12-00221.1
- 347 Marques, V., Milhau, T., Albouy, C., Dejean, T., Manel, S., Mouillot, D., & Juhel, J.-B.  
348 (2021). GAPeDNA: Assessing and mapping global species gaps in genetic databases  
349 for eDNA metabarcoding. *Diversity and Distributions*. doi: 10.1111/ddi.13142
- 350 Martin, M. (2011). Cutadapt removes adapter sequences from high-throughput sequencing  
351 reads. *EMBnet.Journal*, 17(1), 10. doi: 10.14806/ej.17.1.200
- 352 McInnes, J. C., Jarman, S. N., Lea, M.-A., Raymond, B., Deagle, B. E., Phillips, R. A., ...  
353 Alderman, R. (2017). DNA Metabarcoding as a Marine Conservation and  
354 Management Tool: A Circumpolar Examination of Fishery Discards in the Diet of  
355 Threatened Albatrosses. *Frontiers in Marine Science*, 4, 277. doi:  
356 10.3389/fmars.2017.00277

- 357 Miya, M., Sato, Y., Fukunaga, T., Sado, T., Poulsen, J. Y., Sato, K., ... Iwasaki, W. (2015).  
358 MiFish, a set of universal PCR primers for metabarcoding environmental DNA from  
359 fishes: Detection of more than 230 subtropical marine species. *Royal Society Open*  
360 *Science*, 2(7), 150088. doi: 10/gmcj95
- 361 Roberts, CD, Stewart, A., Struthers, C., Barker, J., & Kortet, S. (2019). *Checklist of the*  
362 *Fishes of New Zealand* (No. July; p. 219). Museum of New Zealand Te Papa  
363 Tongarewa. Retrieved from Museum of New Zealand Te Papa Tongarewa website:  
364 <https://collections.tepapa.govt.nz/document/10564>
- 365 Roberts, Clive (Ed.). (2005). *Regional diversity and biogeography of coastal fishes on the*  
366 *West Coast South Island of New Zealand*. Wellington, N.Z: Dept. of Conservation.
- 367 Sigsgaard, E. E., Torquato, F., Frøslev, T. G., Moore, A. B. M., Sørensen, J. M., Range, P.,  
368 ... Thomsen, P. F. (2020). Using vertebrate environmental DNA from seawater in  
369 biomonitoring of marine habitats. *Conservation Biology*, 34(3), 697–710. doi:  
370 10/gmcj83
- 371 Stoeckle, M. Y., Das Mishu, M., & Charlop-Powers, Z. (2020). Improved Environmental  
372 DNA Reference Library Detects Overlooked Marine Fishes in New Jersey, United  
373 States. *Frontiers in Marine Science*, 7, 226. doi: 10.3389/fmars.2020.00226
- 374 Taberlet, P., Bonin, A., Zinger, L., & Coissac, E. (2018). *Environmental DNA: For*  
375 *biodiversity research and monitoring* (1st ed.). New York, NY: Oxford University  
376 Press.
- 377 Weigand, H., Beermann, A. J., Čiampor, F., Costa, F. O., Csabai, Z., Duarte, S., ... Ekrem, T.  
378 (2019). DNA barcode reference libraries for the monitoring of aquatic biota in  
379 Europe: Gap-analysis and recommendations for future work. *Science of the Total*  
380 *Environment*, 678, 499–524. doi: 10/c6tb

381 Wing, S. R., & Jack, L. (2013). Marine reserve networks conserve biodiversity by stabilizing  
382 communities and maintaining food web structure. *Ecosphere*, 4(11), art135. doi:  
383 10.1890/ES13-00257.1

384

385 **Figures and Tables**

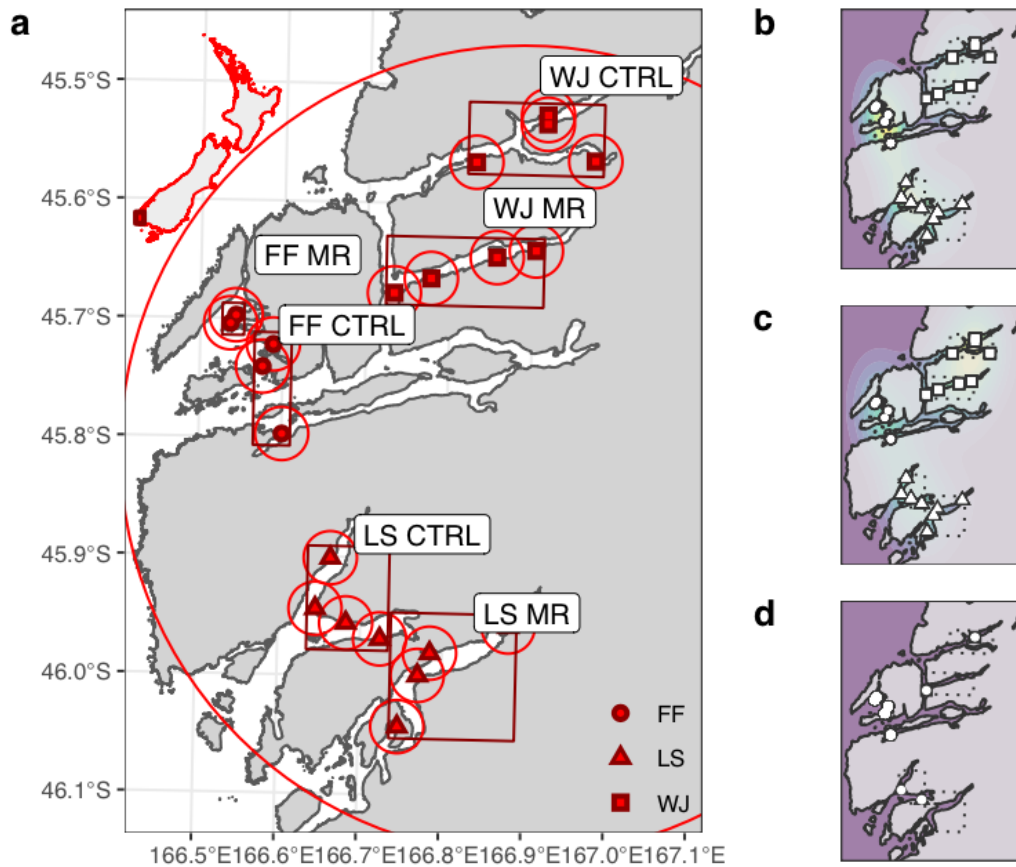

386

387 **Fig. 1:** Field work area, description, sites, and data coverage for eDNA, BRUV, and  
388 OBIS data. **a:** We obtained biodiversity information from baited remote underwater video  
389 (BRUV) footage and environmental DNA (eDNA) data from 21 field work sites across  
390 three sampling regions (highlighted by rectangles) – Five Fingers (FF), Long Sound (LS)  
391 and Wet Jacket (WJ). In each region we collected samples inside marine reserves /  
392 commercial exclusion zones (MR) and outside in control areas (CTRL). To obtain  
393 additional biodiversity information, we queried the Ocean Biodiversity Information  
394 System (OBIS – <https://obis.org/>) for records within a 2.5 km radius of each field work  
395 site (small circles) for the purpose of community structure analysis. Furthermore, we  
396 obtained OBIS records for the entire sampling region (large circle) to extend our species  
397 list alongside species mentioned across various literature sources (Table 1, SI Table 3). **b:**  
398 Environmental DNA (eDNA), and **c:** BRUV data in a spatial context, lighter colour  
399 indicates a higher density of distinct species observations (corresponding to numerical  
400 values in Fig. 2). **d:** Species data for all field work sites could not be obtained from OBIS,

401 necessitating the exclusion of this data in the statistical analyses of regional biodiversity  
 402 data. Graph created using R package *ggplot2* (3.3.5).

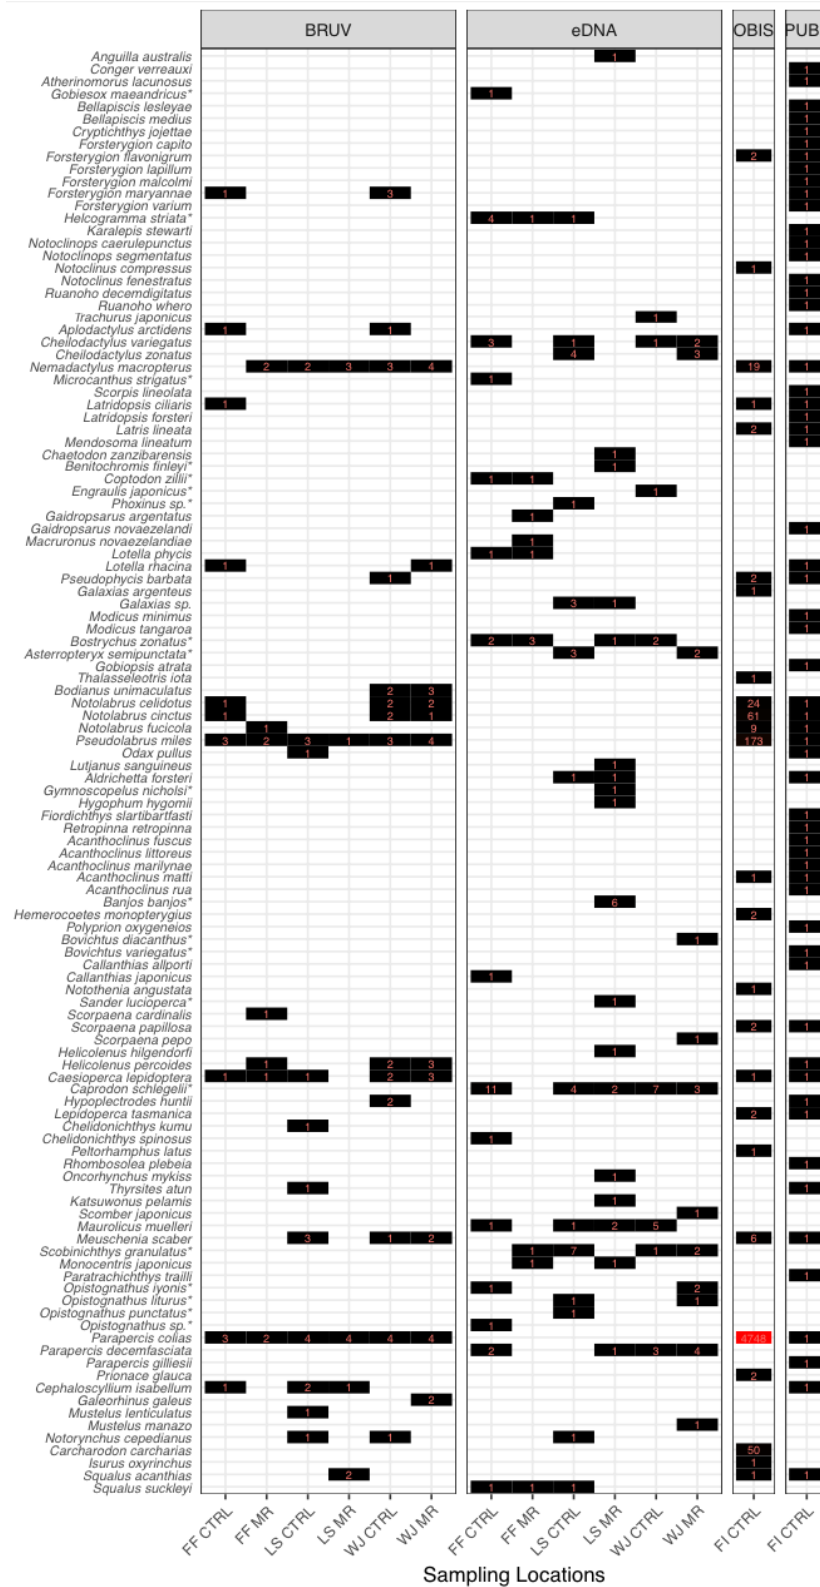

403

Sampling Locations



404 **Fig. 2:** Distinct species observations across data sources and field work locations.  
 405 Observation types: **BRUV** – Observations from baited remote underwater surveys; **eDNA**  
 406 – environmental DNA observations; **OBIS** – data retrieved from the Ocean Biodiversity  
 407 Information System (<https://obis.org/>) for the area surrounding field work sites (large  
 408 circle in Fig.1); **PUBL** – Fiordland fish species collated from multiple literature records  
 409 as summarized by Inglis (2008). Sampling Locations: FF – Five Fingers area; LS – Long  
 410 Sound area; WJ – Wet Jacket area; MR – marine reserve or commercial exclusion zone;  
 411 CTRL – neither marine reserve nor commercial exclusion zone. Species list: Order  
 412 follows Table 1, species not listed as New Zealand Species in (CD Roberts et al., 2019)  
 413 are marked with an asterisk (\*). Graph created using R package *ggplot2* (3.3.5).

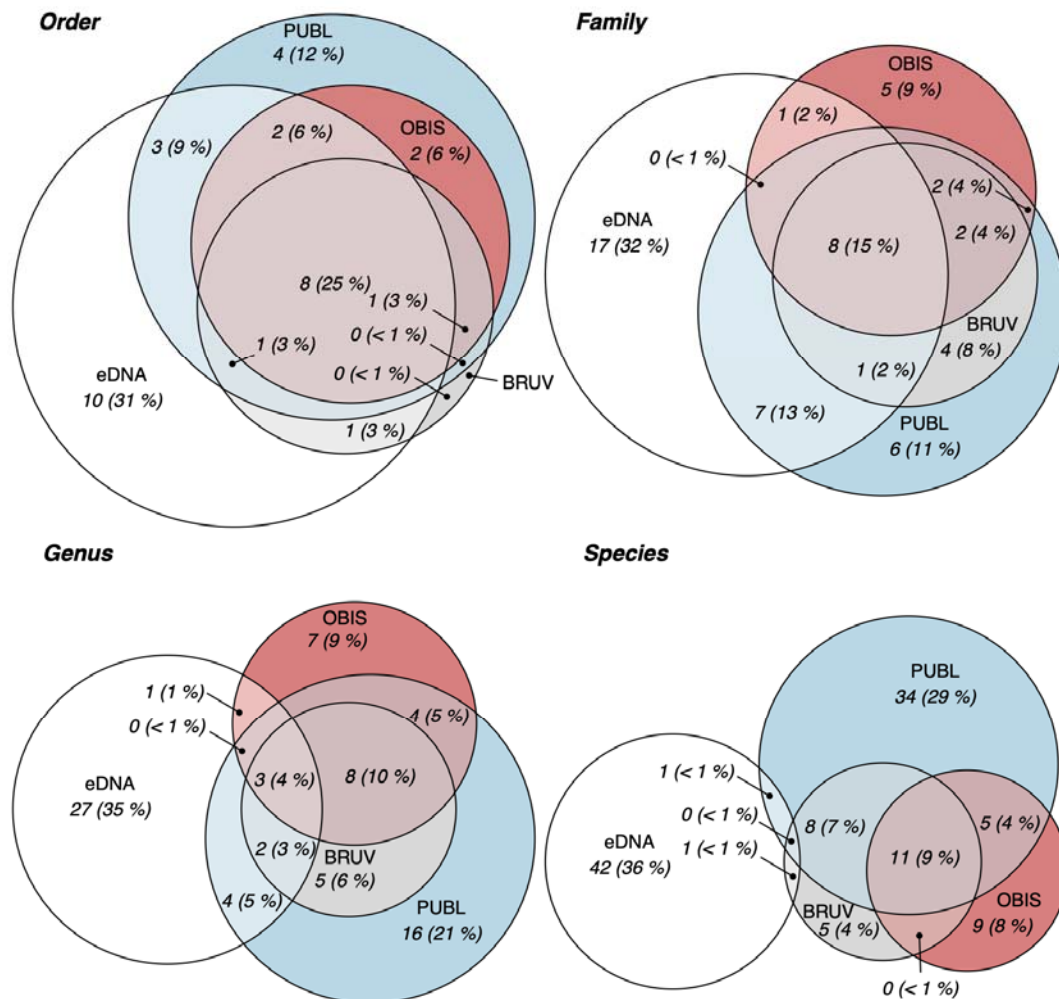

414  
 415 **Fig. 3:** Concordance of taxonomic information across four data sources of Fiordland fish  
 416 biodiversity. Biodiversity data (Table 1, SI Table 2) is summarized at four different

417 taxonomic levels, shown are unique observation counts at each level, as well as the  
418 corresponding percentage of those counts in comparison to all data. Circle sizes  
419 proportional to observation count. Observation types: BRUV (grey) – Observations from  
420 baited remote underwater surveys; eDNA (white) – environmental DNA observations;  
421 OBIS (red) – data retrieved from the Ocean Biodiversity Information System  
422 (<https://obis.org/>) for the area surrounding field work sites (large circle in Fig.1); PUBL  
423 (blue) – Fiordland fish species collated from multiple literature records as summarized by  
424 (Inglis et al., 2008). Graph created using R package *eulerr* (6.1.0).

425 **Table 1:** Details on taxonomic observations across data sources. Taxonomic hierarchies conform with NCBI taxonomy where available, thus  
426 allow analysis in relation to environmental DNA (eDNA) data and are sorted alphabetically – the resulting species order is identical to Fig. 2.  
427 Taxa not listed as New Zealand species by Roberts et al., (2019) are highlighted with asterisk (\*). Trivial names are indicated where  
428 available from NCBI. For all taxonomic assignments also yield from eDNA we provide the alignment coverage and alignment gaps. Since  
429 identical species were assigned to multiple Amplicon Sequence Variants (ASV's; Callahan et al., 2017) in some instances, ranges are  
430 provided for alignment coverages and gap counts for species-specific alignments.

431

| Phylum   | Class       | Order                        | Family                       | Genus                           | Species                        | Common name                 | Algn. covrg.             | Algn. gaps |
|----------|-------------|------------------------------|------------------------------|---------------------------------|--------------------------------|-----------------------------|--------------------------|------------|
| Chordata | Actinopteri | Anguilliformes               | Anguillidae                  | <i>Anguilla</i>                 | <i>Anguilla australis</i>      | Australian shortfin eel     | 100%                     | 0          |
|          |             |                              | Congridae                    | <i>Conger</i>                   | <i>Conger verreauxi</i>        | conger eel                  |                          |            |
|          |             | Atheriniformes               | Atherinidae                  | <i>Atherinomorus</i>            | <i>Atherinomorus lacunosus</i> | hardyhead silverside        |                          |            |
|          |             | Blenniiformes                | Gobiesocidae                 | <i>Gobiesox</i> *               | <i>Gobiesox maeandricus</i> *  | northern clingfish          | 79.3%                    | 2          |
|          |             |                              |                              | Tripterygiidae                  | <i>Bellapiscis</i>             | <i>Bellapiscis lesleyae</i> | mottled twister          |            |
|          |             |                              | <i>Bellapiscis medius</i>    |                                 |                                | twister                     |                          |            |
|          |             |                              | <i>Cryptichthys</i>          |                                 | <i>Cryptichthys jojettae</i>   |                             |                          |            |
|          |             |                              | <i>Forsterygion</i>          |                                 | <i>Forsterygion capito</i>     |                             | spotted robust triplefin |            |
|          |             |                              |                              | <i>Forsterygion flavonigrum</i> |                                | yellow-and-black triplefin  |                          |            |
|          |             | <i>Forsterygion lapillum</i> |                              |                                 | common triplefin               |                             |                          |            |
|          |             |                              | <i>Forsterygion malcolmi</i> |                                 |                                |                             |                          |            |

|                  |                |                     |                                       |                           |                |   |
|------------------|----------------|---------------------|---------------------------------------|---------------------------|----------------|---|
|                  |                |                     | <i>Forsterygion<br/>maryannae</i>     |                           |                |   |
|                  |                |                     | <i>Forsterygion<br/>varium</i>        | striped<br>triplefin      |                |   |
|                  |                | <i>Helcogramma*</i> | <i>Helcogramma<br/>striata*</i>       |                           | 88.2-<br>92.3% | 1 |
|                  |                | <i>Karalepis</i>    | <i>Karalepis<br/>stewarti</i>         |                           |                |   |
|                  |                | <i>Notoclinops</i>  | <i>Notoclinops<br/>caerulepunctus</i> |                           |                |   |
|                  |                |                     | <i>Notoclinops<br/>segmentatus</i>    |                           |                |   |
|                  |                | <i>Notoclinus</i>   | <i>Notoclinus<br/>compressus</i>      |                           |                |   |
|                  |                |                     | <i>Notoclinus<br/>fenestratus</i>     |                           |                |   |
|                  |                | <i>Ruanoho</i>      | <i>Ruanoho<br/>decemdigitatus</i>     |                           |                |   |
|                  |                |                     | <i>Ruanoho whero</i>                  | spectacled<br>triplefin   |                |   |
| Carangiformes    | Carangidae     | <i>Trachurus</i>    | <i>Trachurus<br/>japonicus</i>        | Japanese jack<br>mackerel | 99.4%          | 0 |
| Centrarchiformes | Aplodactylidae | <i>Aplodactylus</i> | <i>Aplodactylus<br/>arctidens</i>     |                           |                |   |

|                   |                  |                       |                                  |                     |            |   |
|-------------------|------------------|-----------------------|----------------------------------|---------------------|------------|---|
|                   | Cheilodactylidae | <i>Cheilodactylus</i> | <i>Cheilodactylus variegatus</i> |                     | 97.6-98.8% | 0 |
|                   |                  |                       | <i>Cheilodactylus zonatus</i>    | blackbarred morwong | 97-97.6%   | 0 |
|                   |                  | <i>Nemadactylus</i>   | <i>Nemadactylus macropterus</i>  | tarakihi            |            |   |
|                   | Kyphosidae       | <i>Microcanthus*</i>  | <i>Microcanthus strigatus*</i>   | stripey             | 85.3%      | 3 |
|                   |                  | <i>Scorpis</i>        | <i>Scorpis lineolata</i>         | silver sweep        |            |   |
|                   | Latridae         | <i>Latridopsis</i>    | <i>Latridopsis ciliaris</i>      | blue moki           |            |   |
|                   |                  |                       | <i>Latridopsis forsteri</i>      | bastard trumpeter   |            |   |
|                   |                  | <i>Latris</i>         | <i>Latris lineata</i>            | striped trumpeter   |            |   |
|                   |                  | <i>Mendosoma</i>      | <i>Mendosoma lineatum</i>        |                     |            |   |
| Chaetodontiformes | Chaetodontidae   | <i>Chaetodon</i>      | <i>Chaetodon zanzibarensis</i>   |                     | 81.5%      | 4 |
| Cichliformes      | Cichlidae        | <i>Benitochromis*</i> | <i>Benitochromis finleyi*</i>    |                     | 79.4%      | 0 |
|                   |                  | <i>Coptodon*</i>      | <i>Coptodon zillii*</i>          | redbelly tilapia    | 90.6%      | 3 |

|                 |                |                     |                                   |                             |                          |   |
|-----------------|----------------|---------------------|-----------------------------------|-----------------------------|--------------------------|---|
| Clupeiformes    | Engraulidae    | <i>Engraulis*</i>   | <i>Engraulis japonicus*</i>       | Japanese anchovy            | 98.8%                    | 0 |
| Cypriniformes   | Cyprinidae     | <i>Phoxinus*</i>    | <i>Phoxinus sp.*</i>              |                             | 97.1%                    | 0 |
| Gadiformes      | Gaidropsaridae | <i>Gaidropsarus</i> | <i>Gaidropsarus argentatus</i>    | Arctic rockling             | 90.1%                    | 1 |
|                 |                |                     | <i>Gaidropsarus novaezealandi</i> |                             |                          |   |
|                 | Merlucciidae   | <i>Macruronus</i>   | <i>Macruronus novaezealandiae</i> | blue grenadier              | 100%                     | 0 |
| Moridae         |                | <i>Lotella</i>      | <i>Lotella phycis</i>             |                             | 95.9%                    | 0 |
|                 |                |                     | <i>Lotella rhacina</i>            | rock cod                    |                          |   |
|                 |                |                     | <i>Pseudophycis</i>               | <i>Pseudophycis barbata</i> | southern bastard codling |   |
| Galaxiiformes   | Galaxiidae     | <i>Galaxias</i>     | <i>Galaxias argenteus</i>         |                             |                          |   |
|                 |                |                     | <i>Galaxias sp.</i>               |                             | 96.5%                    | 0 |
| Gobiesociformes | Gobiesocidae   | <i>Modicus</i>      | <i>Modicus minimus</i>            |                             |                          |   |
| Gobiiiformes    | Eleotridae     | <i>Bostrychus*</i>  | <i>Modicus tangaroa</i>           |                             |                          |   |
|                 |                |                     | <i>Bostrychus zonatus*</i>        | barred gudgeon              | 85.4-86%                 | 5 |

|                |                     |                        |                                    |                       |            |   |
|----------------|---------------------|------------------------|------------------------------------|-----------------------|------------|---|
|                | Gobiidae            | <i>Asterropteryx*</i>  | <i>Asterropteryx semipunctata*</i> | starry goby           | 81.9-82.5% | 6 |
|                |                     | <i>Gobiopsis</i>       | <i>Gobiopsis atrata</i>            |                       |            |   |
|                | Thalasseleotrididae | <i>Thalasseleotris</i> | <i>Thalasseleotris iota</i>        |                       |            |   |
| Labriformes    | Labridae            | <i>Bodianus</i>        | <i>Bodianus unimaculatus</i>       | red pigfish           |            |   |
|                |                     | <i>Notolabrus</i>      | <i>Notolabrus celidotus</i>        | New Zealand spotty    |            |   |
|                |                     |                        | <i>Notolabrus cinctus</i>          |                       |            |   |
|                |                     |                        | <i>Notolabrus fucicola</i>         | yellow-saddled wrasse |            |   |
|                |                     | <i>Pseudolabrus</i>    | <i>Pseudolabrus miles</i>          |                       |            |   |
|                | Odacidae            | <i>Odax</i>            | <i>Odax pullus</i>                 | greenbone             |            |   |
| Lutjaniformes  | Lutjanidae          | <i>Lutjanus</i>        | <i>Lutjanus sanguineus</i>         | humphead snapper      | 80.8%      | 6 |
| Mugiliformes   | Mugilidae           | <i>Aldrichetta</i>     | <i>Aldrichetta forsteri</i>        | yellow-eye mullet     | 96-100%    | 0 |
| Myctophiformes | Myctophidae         | <i>Gymnoscopelus*</i>  | <i>Gymnoscopelus nicholsi*</i>     |                       | 79.8%      | 1 |



|                |               |                      |                                     |                |   |
|----------------|---------------|----------------------|-------------------------------------|----------------|---|
|                |               | <i>Hygophum</i>      | <i>Hygophum hygomii</i>             | 78.7%          | 3 |
| Ophidiiformes  | Bythitidae    | <i>Fiordichthys</i>  | <i>Fiordichthys slartibartfasti</i> |                |   |
| Osmeriformes   | Retropinnidae | <i>Retropinna</i>    | <i>Retropinna retropinna</i>        | cucumberfish   |   |
| Ovalentaria    | Plesiopidae   | <i>Acanthoclinus</i> | <i>Acanthoclinus fuscus</i>         |                |   |
|                |               |                      | <i>Acanthoclinus littoreus</i>      |                |   |
|                |               |                      | <i>Acanthoclinus marilynae</i>      |                |   |
|                |               |                      | <i>Acanthoclinus matti</i>          |                |   |
|                |               |                      | <i>Acanthoclinus rua</i>            |                |   |
| Pempheriformes | Banjosidae    | <i>Banjos*</i>       | <i>Banjos banjos*</i>               | 84.7-<br>85.2% | 0 |
|                | Percophidae   | <i>Hemerocoetes</i>  | <i>Hemerocoetes monopterygius</i>   |                |   |
|                | Polyprionidae | <i>Polyprion</i>     | <i>Polyprion oxygeneios</i>         |                |   |
| Perciformes    | Bovichtidae   | <i>Bovichtus*</i>    | <i>Bovichtus diacanthus*</i>        | 94.1%          | 0 |

|               |                    |                                |                      |            |     |
|---------------|--------------------|--------------------------------|----------------------|------------|-----|
|               |                    | <i>Bovichtus variegatus*</i>   | thornfish            |            |     |
| Callanthiidae | <i>Callanthias</i> | <i>Callanthias allporti</i>    |                      |            |     |
|               |                    | <i>Callanthias japonicus</i>   |                      | 95.2%      | 1   |
| Nototheniidae | <i>Notothenia</i>  | <i>Notothenia angustata</i>    | Maori chief          |            |     |
| Percidae      | <i>Sander*</i>     | <i>Sander lucioperca*</i>      | pikeperch            | 81.4%      | 3   |
| Scorpaenidae  | <i>Scorpaena</i>   | <i>Scorpaena cardinalis</i>    | red rock cod         |            |     |
|               |                    | <i>Scorpaena papillosa</i>     |                      |            |     |
|               |                    | <i>Scorpaena pepo</i>          | pumpkin scorpionfish | 85.7%      | 0   |
| Sebastidae    | <i>Helicolenus</i> | <i>Helicolenus hilgendorfi</i> |                      | 95.4%      | 0   |
|               |                    | <i>Helicolenus percoides</i>   |                      |            |     |
| Serranidae    | <i>Caesioperca</i> | <i>Caesioperca lepidoptera</i> |                      |            |     |
|               | <i>Caprodon*</i>   | <i>Caprodon schlegelii*</i>    | sunrise perch        | 90.6-98.2% | 0-2 |

|                   |                 |                        |                                 |                      |            |      |
|-------------------|-----------------|------------------------|---------------------------------|----------------------|------------|------|
|                   |                 | <i>Hypoplectrodes</i>  | <i>Hypoplectrodes huntii</i>    |                      |            |      |
|                   |                 | <i>Lepidoperca</i>     | <i>Lepidoperca tasmanica</i>    |                      |            |      |
|                   | Triglidae       | <i>Chelidonichthys</i> | <i>Chelidonichthys kumu</i>     | bluefin gurnard      |            |      |
|                   |                 |                        | <i>Chelidonichthys spinosus</i> | red gurnard          | 99.4%      | 0    |
| Pleuronectiformes | Rhombosoleidae  | <i>Peltorhamphus</i>   | <i>Peltorhamphus latus</i>      | speckled sole        |            |      |
|                   |                 | <i>Rhombosolea</i>     | <i>Rhombosolea plebeia</i>      | New Zealand flounder |            |      |
| Salmoniformes     | Salmonidae      | <i>Oncorhynchus</i>    | <i>Oncorhynchus mykiss</i>      | rainbow trout        | 100%       | 0    |
| Scombriformes     | Gempylidae      | <i>Thyrsites</i>       | <i>Thyrsites atun</i>           | snoek                |            |      |
|                   | Scombridae      | <i>Katsuwonus</i>      | <i>Katsuwonus pelamis</i>       | skipjack tuna        | 95.9%      | 0    |
|                   |                 | <i>Scomber</i>         | <i>Scomber japonicus</i>        | chub mackerel        | 100%       | 0    |
| Stomiiformes      | Sternoptychidae | <i>Maurolicus</i>      | <i>Maurolicus muelleri</i>      | pearlsides           | 86.3-99.4% | 0-10 |
| Tetraodontiformes | Monacanthidae   | <i>Meuschenia</i>      | <i>Meuschenia scaber</i>        | velvet leatherjacket |            |      |

|                |                    |                 |                         |                                   |                      |            |     |
|----------------|--------------------|-----------------|-------------------------|-----------------------------------|----------------------|------------|-----|
|                |                    |                 | <i>Scobinichthys</i> *  | <i>Scobinichthys granulatus</i> * | rough leatherjacket  | 98.8-99.4% | 0   |
|                | Trachichthyiformes | Monocentridae   | <i>Monocentris</i>      | <i>Monocentris japonicus</i>      |                      | 94.4-97.6% | 2-3 |
|                |                    | Trachichthyidae | <i>Paratrachichthys</i> | <i>Paratrachichthys trailli</i>   | sandpaper fish       |            |     |
|                | undefined          | Opistognathidae | <i>Opistognathus</i> *  | <i>Opistognathus iyonis</i> *     |                      | 89.9-90.5% | 2-3 |
|                |                    |                 |                         | <i>Opistognathus liturus</i> *    | seto-amadai          | 89.3-90.5% | 2   |
|                |                    |                 |                         | <i>Opistognathus punctatus</i> *  | finespotted jawfish  | 81.7%      | 5   |
|                |                    |                 |                         | <i>Opistognathus sp.*</i>         |                      | 85.7%      | 2   |
|                | Uranoscopiformes   | Pinguipedidae   | <i>Parapercis</i>       | <i>Parapercis colias</i>          | New Zealand blue cod |            |     |
|                |                    |                 |                         | <i>Parapercis decemfasciata</i>   |                      | 80.9%      | 1   |
|                |                    |                 |                         | <i>Parapercis gilliesii</i>       | yellow weaver        |            |     |
| Chondrichthyes | Carcharhiniformes  | Carcharhinidae  | <i>Prionace</i>         | <i>Prionace glauca</i>            | blue shark           |            |     |
|                |                    | Scyliorhinidae  | <i>Cephaloscyllium</i>  | <i>Cephaloscyllium isabellum</i>  |                      |            |     |

|                |             |                    |                               |                              |       |   |
|----------------|-------------|--------------------|-------------------------------|------------------------------|-------|---|
|                | Triakidae   | <i>Galeorhinus</i> | <i>Galeorhinus galeus</i>     | tope shark                   |       |   |
|                |             | <i>Mustelus</i>    | <i>Mustelus lenticulatus</i>  | spotted estuary smooth-hound |       |   |
|                |             |                    | <i>Mustelus manazo</i>        | starspotted smooth-hound     | 98.9% | 0 |
| Hexanchiformes | Hexanchidae | <i>Notorynchus</i> | <i>Notorynchus cepedianus</i> | broadnose sevengill shark    | 98.4% | 0 |
| Lamniformes    | Alopiidae   | <i>Carcharodon</i> | <i>Carcharodon carcharias</i> | great white shark            |       |   |
|                |             | <i>Isurus</i>      | <i>Isurus oxyrinchus</i>      | shortfin mako shark          |       |   |
| Squaliformes   | Squalidae   | <i>Squalus</i>     | <i>Squalus acanthias</i>      | spiny dogfish                |       |   |
|                |             |                    | <i>Squalus suckleyi</i>       | Puget Sound dogfish          | 100%  | 0 |

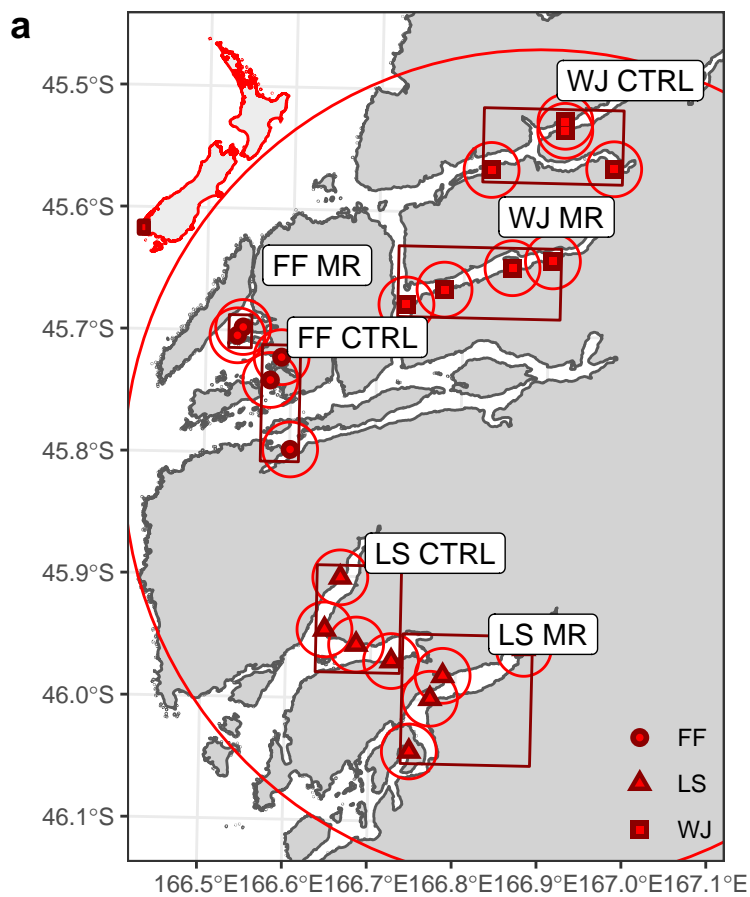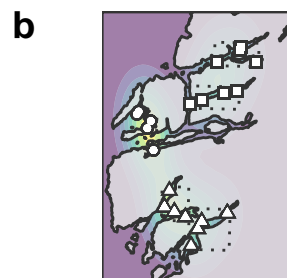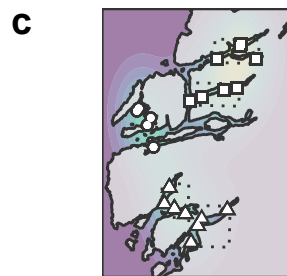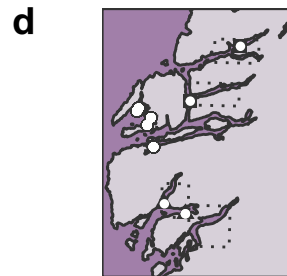

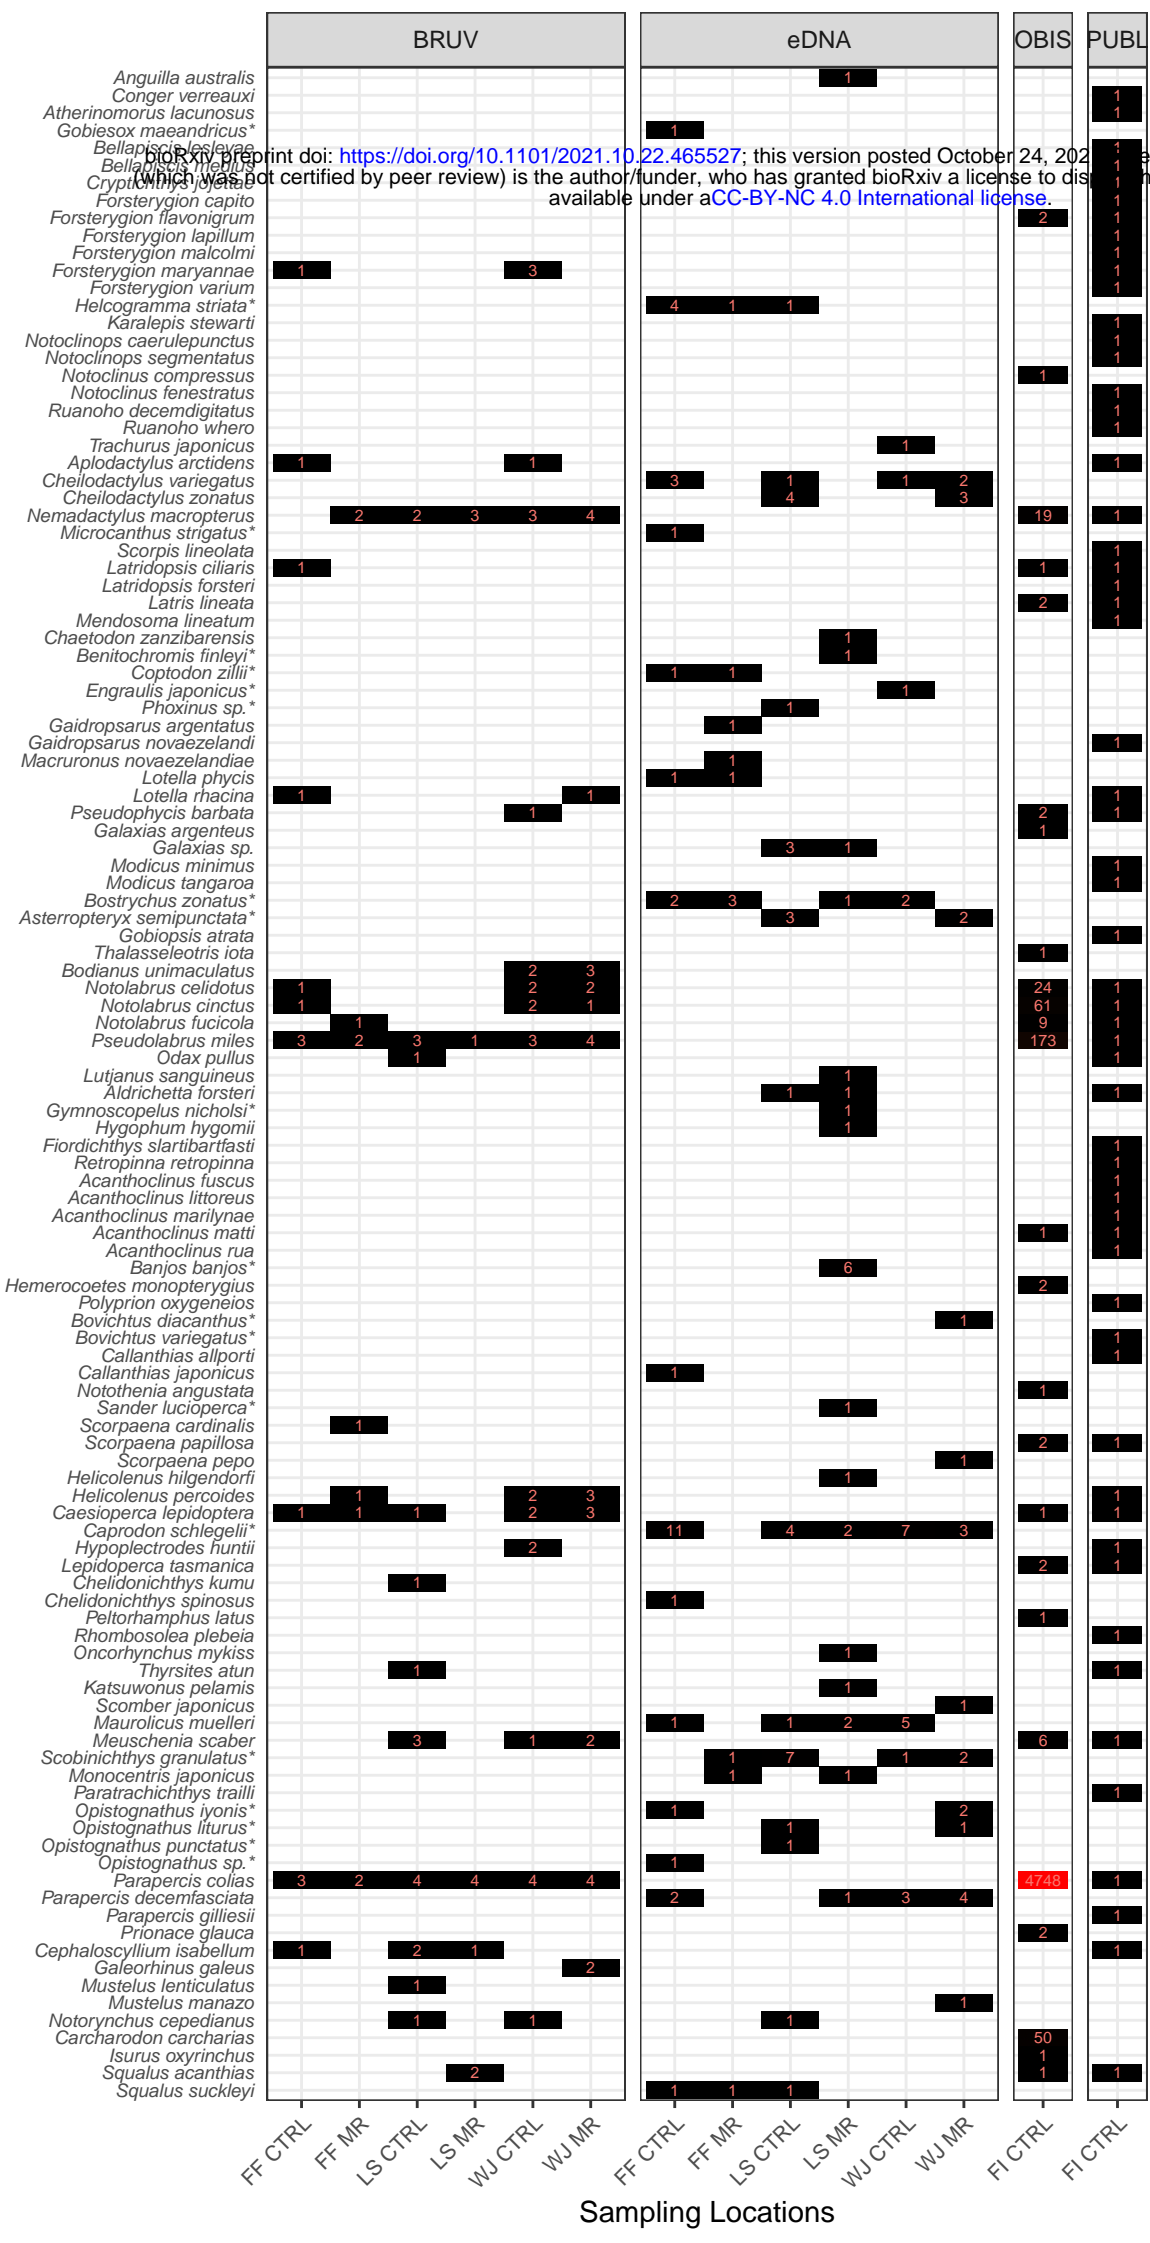

### Order

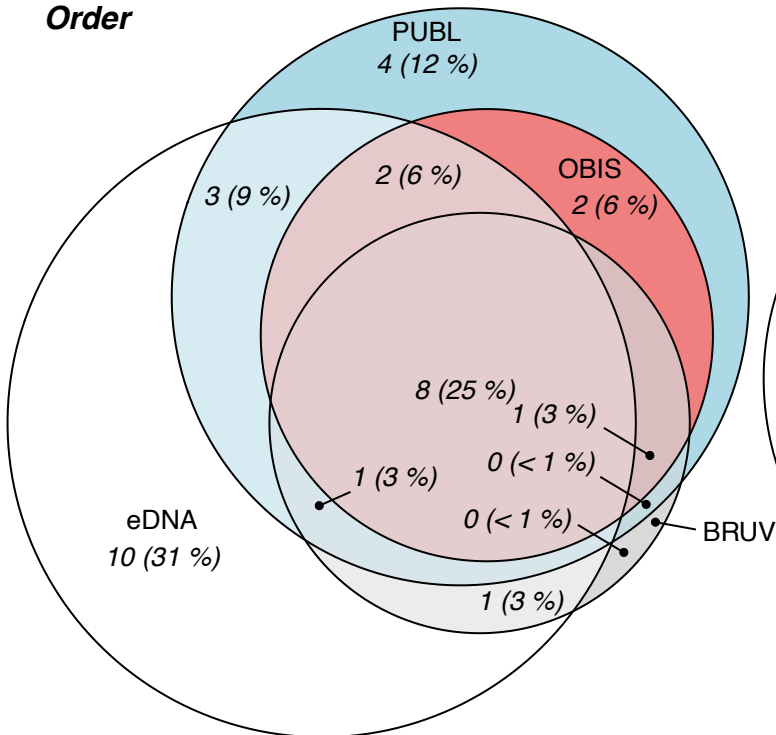

### Family

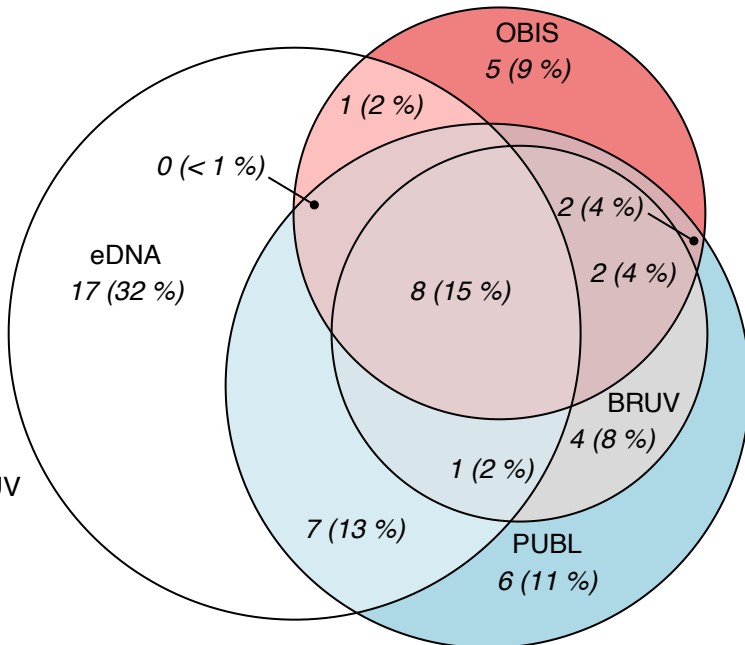

### Genus

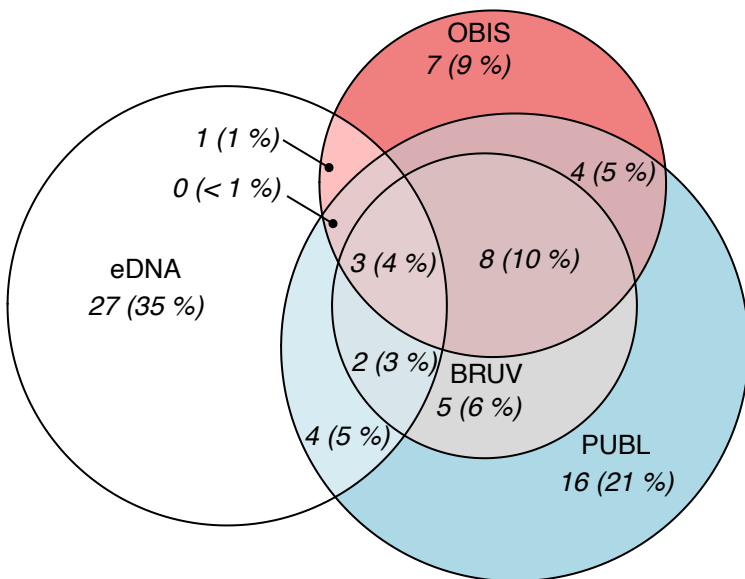

### Species

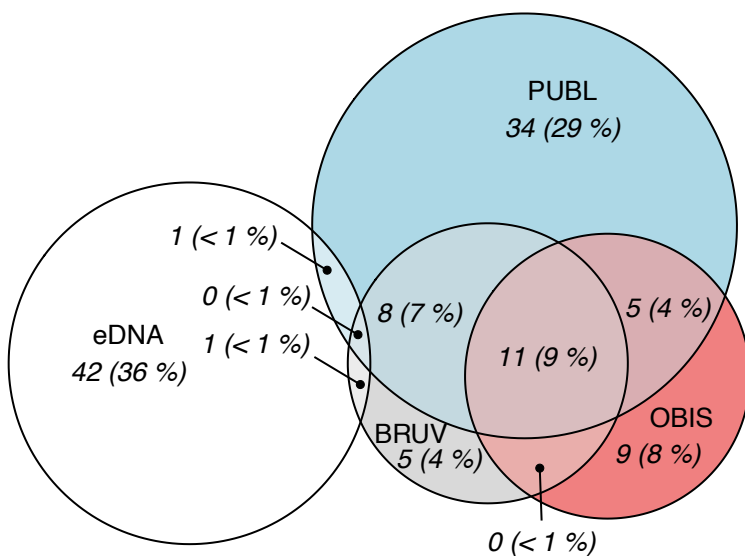

Source: https://www.biorxiv.org/content/10.1101/2021.10.22.465527v1.full.pdf
