# 1           **Environmental DNA analysis needs local reference data to** 2           **inform taxonomy-based conservation policy – A case study** 3           **from Aotearoa / New Zealand**

4       Paul Czechowski<sup>1a\*</sup>, Michel de Lange<sup>2,3,b</sup> Michael Heldsinger<sup>4c</sup>, Will Rayment<sup>4,5d</sup>,  
5       Christopher Hepburn<sup>4,5e</sup>, Monique Ladds<sup>6f</sup>, and Michael Knapp<sup>1,5g</sup>

6       <sup>1</sup>Department of Anatomy, University of Otago, PO Box 56, Dunedin 9054, Aotearoa /  
7       New Zealand; <sup>2</sup>Biostatistics Centre, University of Otago, PO Box 56, Dunedin 9054,  
8       Aotearoa / New Zealand; <sup>3</sup>Pacific Edge, 87 Saint David Street, Dunedin 9016, Aotearoa /  
9       New Zealand; <sup>4</sup>Department of Marine Science, University of Otago, PO Box 56, Dunedin  
10      9054, Aotearoa / New Zealand <sup>5</sup>Coastal People Southern Skies Centre of Research  
11      Excellence, University of Otago, PO Box 56, Dunedin 9054, Aotearoa / New Zealand;  
12      <sup>6</sup>Department of Conservation PO Box 10 420, Wellington 6143, Aotearoa / New Zealand.

13      [paul.czechowski@otago.ac.nz](mailto:paul.czechowski@otago.ac.nz); [michel.delange@posteo.nz](mailto:michel.delange@posteo.nz);

14      [michael.heldsinger@gmail.com](mailto:michael.heldsinger@gmail.com); [will.rayment@otago.ac.nz](mailto:will.rayment@otago.ac.nz);

15      [chris.hepburn@otago.ac.nz](mailto:chris.hepburn@otago.ac.nz); [mladds@doc.govt.nz](mailto:mladds@doc.govt.nz); [michael.knapp@otago.ac.nz](mailto:michael.knapp@otago.ac.nz)

16      **Running title:** eDNA in marine reserves of Aotearoa

17      **Keywords:** BRUV, conservation, fish, environmental DNA, marine reserve, visual  
18      survey, sharks

19      **Article Type:** Perspectives

20      **Number of words:** 3195 (Introduction up to and including Acknowledgements)

21      **Number of references:** 29

22      **Number of Figures and Tables:** 4 + 1

23      **Corresponding Author:** Paul Czechowski, Department of Anatomy, University of  
24      Otago, PO Box 56, Dunedin 9054, Aotearoa / New Zealand;  
25      [paul.czechowski@otago.ac.nz](mailto:paul.czechowski@otago.ac.nz); Phone +64 021 024 91263

## 26 **Abstract**

27 Effective management of biodiversity requires regular surveillance of multiple species.  
 28 Analysis of environmental DNA by metabarcoding (eDNA) holds promise to achieve this  
 29 relatively easily. However, taxonomic inquiries into eDNA data need suitable molecular  
 30 reference data, which are often lacking. We evaluate the impact of this reference data void in  
 31 a case study of fish diversity in the remote fiords of New Zealand. We compared eDNA-  
 32 derived species identifications against Baited Remote Underwater Video (BRUV) data  
 33 collected at the same time and locations as the eDNA data. Furthermore, we cross referenced  
 34 both eDNA and BRUV data against species lists for the same region obtained from literature  
 35 surveys and the Ocean Biodiversity Information System (OBIS). From all four data sources,  
 36 we obtained a total of 116 species records (106 ray-finned fishes, 10 cartilaginous fishes; 59  
 37 from literature, 44 from eDNA, 25 from BRUV, 25 from OBIS). Concordance of taxonomies  
 38 between the data sources dissolved with lowering taxonomic levels, most decisively so for  
 39 eDNA data. BRUV agreed with local biodiversity information much better and fared better in  
 40 detecting regional biodiversity dissimilarities. We provide evidence that eDNA  
 41 metabarcoding will remain a powerful but impaired tool for species-level biodiversity  
 42 management without locally generated reference data.

## 43 **Introduction**

44 Marine reserve (MR) networks conserve biodiversity by stabilizing communities and  
 45 maintaining food web structure (Wing & Jack, 2013). Effective management of MR  
 46 biodiversity requires regular surveillance, for example to avoid overexploitation by fishing  
 47 (Wing & Jack, 2013), or to avoid damage through influx of non-indigenous species  
 48 (Cunningham, 2019). Fish surveillance is of particular interest due to their sensitivity to most  
 49 forms of human disturbance, their usefulness at all levels of biological organization, and the  
 50 favourable benefit-to-cost ratio of fish assessment programmes (Harris, 1995).

51 Analysis of environmental DNA (eDNA) metabarcoding data is a well-established molecular  
 52 technique for multispecies surveys (Cristescu & Hebert, 2018). Environmental DNA  
 53 metabarcoding holds promise for biodiversity surveys intended to inform biodiversity  
 54 management – associated techniques are regarded more cost-efficient than traditional  
 55 methods (such as baited remote underwater video surveys – BRUV), less dependent on expert  
 56 taxonomic knowledge, can be standardized, and are able to inform on a broad range of taxa  
 57 (Sigsgaard et al., 2020).

58 Reliable low-level taxonomic annotation is a prerequisite for useful biodiversity management  
59 and biological surveillance (e.g., Jack & Wing 2013). For example, in a southern New  
60 Zealand context, *Parapercis colias* (blue cod) is of high commercial interest, but three other  
61 of the 79 cod species are known from New Zealand (Roberts et al., 2019), so that genus  
62 information alone is ambiguous for determining blue cod presence or absence. Accordingly,  
63 higher-level taxonomic classifications (e.g., family, and order levels) are even less  
64 informative for species level conservation management. This reality translates into the desire  
65 for obtaining perfect 100 bp to 200 bp alignments (Huson et al. 2007) between an unknown  
66 eDNA-derived query sequence and a well described reference sequence derived from a valid  
67 species. In practice, absence of such reference data necessitates relaxation of taxonomy-  
68 assigning alignment parameters to retain sufficient eDNA data for analysis, and in  
69 consequence the data's informative quality suffers.

70 Availability of suitable reference data for metabarcoding is highly variable depending on  
71 taxonomic groups and geographic locations, with fish considered relatively well covered in  
72 Barcode of Life Data Systems (BOLD) and NCBI's GenBank (Benson et al. 2011) for some  
73 regions such as Europe (Weigand et al., 2019). Arguably, fewer reference data are available  
74 for fish of southern New Zealand. For example, for six commonly used 12S primer pairs,  
75 recognized as well suitable for fish multispecies surveys (Weigand et al., 2019), an average  
76 of 36% of all northern European fish species are available as reference data, but only 26% of  
77 southern New Zealand species (GAPeDNA v1.0.1 web interface, 11-Sep-2021; Marques et  
78 al. 2021; also see SI Table 1).

79 In this study, we evaluate the impact of taxonomic data limitations on multispecies surveys  
80 using the example of fish in the UNESCO World Heritage Site Te Wahipounamu (Fiordland)  
81 in southern New Zealand. We compare the results of concurrent eDNA and BRUV surveys  
82 and cross-reference these data against species lists for the same region obtained from  
83 literature and the Ocean Biodiversity Information System (OBIS). The fish diversity of Te  
84 Wahipounamu has been described based on a diverse range of mostly visual methods. If our  
85 BRUV and eDNA approaches work optimally, we should see a strong overlap between these  
86 field data and previously described fish diversity records of the region.

## 87 **Methods**

88 For this study, we evaluated the presence of Actinopterygii (ray-finned fishes) and  
89 Chondrichthyes (cartilaginous fishes) species in one MR, two commercial exclusion zones

(all “MR”), and corresponding control areas in southern Te Wahipounamu, New Zealand (west coast, approximately from -44.3 to -46.25 Southern latitude; Fig. 1a). We obtained and analysed eDNA and BRUV data as well as electronic records proximate to the field work area from the Ocean Biodiversity Information System (OBIS; Ausubel 1999). Furthermore, a reference list of ray-finned fishes and cartilaginous fishes that have been observed in Fiordland was assembled from literature. All observations were formalized using NCBI taxonomy (Federhen, 2012), including trivial names, and limited to classes Actinopterygii and Chondrichthyes.

Literature data, itself obtained using various methods, were extracted from five sources, including one meta-analysis (SI Table 2). OBIS data were downloaded for a 38 km radius around all field work sites (centre point W 166.89°, S -45.80°), as well as for smaller areas surrounding individual field work sites, (2.5 km radius; Fig. 1a).

For a detailed description of field and laboratory work please refer to SI. For eDNA collection and BRUV filming we visited three locations in southern Te Wahipounamu (Moana Uta / Wet Jacket Arm, Taumoana / Five Fingers, and Te Tapuwae a Hua / Long Sound; henceforth WJ MR, FF MR, and LS MR), and accompanying control areas outside those MRs (henceforth WJ CTRL, FF CTRL, and LS CTRL), from 12.–22. December 2019 (Fig. 1a.) Within each sampling location, at randomised sites, we collected eDNA (mean depth 14.05 m, med.: 15, sd.: 1.4 m), and subsequently deployed BRUV assemblies (mean depth 15.6 m, med.: 16, sd.: 2.6 m; SI). We considered data from 21 sites (FF: 2 FF MR and 3 FF CTRL, WJ: 4 WJ MR and 4 WJ CTRL, and LS: 4 LS MR and 4 LS CTRL). We collected two 900 ml water samples with eDNA at each site, filtered them alongside negative controls, then sealed and stored them until further processing. BRUV footage was obtained for one hour and analysed by eye.

Environmental DNA was isolated in a PCR-free facility alongside extraction and cross-contamination controls (SI: four species of tropical freshwater fish). After *in silico* PCR (SI), we amplified our extracts with the well-established and widely used 12S MiFish primers (“MiFish-U”; Miya et al. 2015; see SI Table 1 for primer comparison), targeting Actinopterygii. Chondrichthyes were targeted with slightly altered derivatives (“Elas02”, Taberlet et al. 2018). Our single-step PCRs were cycled 45 times, with annealing temperatures of 45 °C (MiFish-U) or 40 °C (Elas02). Amplified eDNA was then pooled, visualised, purified, combined equimolarly, diluted to 4.5 pmol, and sequenced on an Illumina MiSeq (Illumina, San Diego, US-CA; kit v2, 300 cycles, single-ended).

We defined Amplicon Sequence Variants (ASVs; Callahan et al. 2017) from eDNA after demultiplexing with Cutadapt v3.0 (Martin, 2011), using Qiime2 2020-08 (Bolyen et al., 2019) and DADA2 1.10.0 (Callahan et al., 2016). To yield high quality sequence data we did not allow any mismatches, nor Expected Errors (Edgar & Flyvbjerg, 2015) during demultiplexing. Taxonomic annotation of denoised data was obtained using Blast 2.10.0+ (Camacho et al., 2009) and a local full copy of the NCBI nucleotide collection (April 2020; Benson et al., 2011) while excluding environmental samples. To yield a maximum of taxonomically annotated ASVs, we chose relaxed taxonomic assignment parameters in combination with an e-value to retain only the most significant alignments. We required a minimum identity of 75% among all alignments and kept five high-scoring pairs for each eDNA query, each of which needed a minimum coverage of 95% to be retained. The minimal acceptable e-value was set to  $10^{-10}$ . We retained the best high-scoring alignment of each query-reference pair based on the highest bit score. We removed data contained in negative controls, alongside ASVs covered by fewer than 15 reads (see SI).

To investigate how well the literature- and OBIS-derived biodiversity information were resolved by eDNA and BRUV, we checked the concordance of all data sources on order, family, genus and on species levels. To judge sampling effort and total species diversity based on BRUV and eDNA observations, we inspected species accumulation curves and calculated Good Turing estimators (giving the number of all species based on species already seen in a small sample; Good, 1953), and then compared those values to combined Te Wahipounamu literature and OBIS species records.

To verify the credibility of eDNA information, we checked all eDNA species lists against a comprehensive list of all New Zealand fish (Roberts et al., 2019) and evaluated species assignment and alignment qualities.

To investigate how useful BRUV, eDNA and OBIS records are in detecting regional differences between fish biodiversity, we used Analysis of Similarity (ANOSIM; Clarke 1993). Thereby analysing Jaccard distances (Jaccard, 1912), we looked for significant differences in taxon (species, genus, family, order) overlap depending on various factor combinations, hence checking whether a particular observation method fared better in detecting taxon composition differences either between different field work areas (WJ, FF, LS), or according to protection status (MR or CNTRL).

## Results

Each of our four data sources yielded different species counts. In total, we yielded 116 species (106 Actinopterygii, 10 Chondrichthyes), comprised of 59 species from previously published Te Wahipounamu works, 44 unique species derived from eDNA, 25 from BRUV and 25 from OBIS (large area; see Table 1, Fig. 2, SI Table 4). While 21 field work sites (Fig. 1a) yielded environmental DNA and BRUV data (Fig. 1b, c) matching local OBIS data could only be obtained for nine field work sites (Fig. 1a, small circles, LS CNTRL, FF, WJ), and hence those finer scaled OBIS data were later excluded from ANOSIM as incomplete data (Fig. 1a, small circles, Fig. 1d). For further comparisons with Good-Turing estimates, we posit the local “real” species count to 68 as the number of unique species observed across literature and OBIS (Fig. 3).

Obtaining community composition comparable to literature and OBIS data within our works’ spatial constraints worked better with BRUV than with eDNA. Nineteen out of 25 species detected with BRUV (76%) were contained in the literature or on OBIS, but only one out of 44 species detected with eDNA (2%) were contained in Te Wahipounamu-specific literature or OBIS (Fig. 1a, large circle). Concordance of taxonomic information between the four data sources dissolved with lowering taxonomic levels, and most decisively for eDNA data (Fig. 3). At species level, only two taxonomic assignments from eDNA matched other data sources, namely *Notorynchus cepedianus* (broadnose sevengill shark), also found with BRUV, and *Aldrichetta forsteri* (yellow-eye mullet) also listed in the literature (Fig. 2). BRUV agreed better with available local biodiversity information, with 11 species mentioned both in the literature and OBIS, and eight detected species mentioned in the literature only (Fig. 3). On BRUV we identified six species (*Bodianus unimaculatus*, *Chelidonichthys kumu*, *Galeorhinus galeus*, *Mustelus lenticulatus*, *Notorynchus cepedianus*, *Scorpaena cardinalis*) not mentioned in literature, and not in OBIS, but occurring in New Zealand waters (Roberts et al., 2019). While our plateauing species accumulation curves suggested exhaustive sampling (SI Fig. 5), Good-Turing estimates of eDNA data inferred a presence of 60 species in the study area (assuming 27% missed after 44 observations), and a presence of 26 species using BRUV (assuming 7% missed after 25 observations).

Alignment qualities associated with taxonomic annotation of eDNA data were variable. Forty-four species assigned among eDNA were defined by 92 ASVs (across 142 observations) of which only six yielded flawless alignments with reference data (i.e. 14%, with full query coverage, no alignment gaps). Eighty-six ASVs had variable query coverage



(37 families, Tab. 1 and SI), while 32 ASVs had variable gap counts (15 families, Tab. 1 and SI). Mean query coverage was 93.2% (min: 78.6%, med: 97%, sd 6.5%), mean gap count was 1 (max: 10, med: 0, sd 1.83; Tab. 1). Nineteen species assignments among eDNA (43%) had not been observed in New Zealand, and none of these species were found using BRUV, across literature, or OBIS data (apart from *Bovichtus variegatus* – thornfish, not in Roberts et al., 2019, but in Roberts, 2005; Fig. 2). Importantly, 25 species observed with eDNA (56.8% of eDNA-observed species) were known from somewhere New Zealand (Roberts et al., 2019) but were not observed in BRUV or found in Te Wahipounamu literature. Interestingly, using eDNA, we obtained perfect alignments between few ASVs and reference data for *Arctocephalus forsteri* (New Zealand fur seal), *Balaenoptera musculus* (blue whale), and *Tursiops truncatus* (bottlenose dolphin).

In ANOSIM, only BRUV data, and not eDNA data, exhibited location-specific differences among species' presence overlaps among the 21 sites – on species, genus, family, and order levels. Significant differences were calculated in overlaps between the six field work areas but not between marine reserve nor control areas (SI Table 3).

Investigation of the strikingly homogenous structure of eDNA data by regression analysis of the 142 non-unique eDNA observations (Tjur's  $R^2$  0.027) suggested each additional alignment gap to be associated with a 39% increased probability of observing a non-native species (Odds Ratio 1.39, 95% CI from 1.19 to 1.66,  $p < 0.01$ ). A 1% increase in alignment concordance was associated with a 7% increased probability of non-native observation (OR 1.07, 95% CI 1.03–1.12,  $p < 0.01$ ). Null deviance was 572.60 on 141 degrees of freedom, residual deviance was 552.31 on 139 degrees of freedom (SI Figs 7 and 8).

## Discussion

What is a realistic estimate of the fish biodiversity in Te Wahipounamu? Based on literature and OBIS alone, we estimate the currently described combined ray-finned and cartilaginous fish species count of Te Wahipounamu to be 68, minding that we constrained OBIS data to surround field sites (Fig. 1, large circle), and that those data are predominantly based on visual observations (SI Table 2). If species counts obtained from literature and OBIS were close to a real value of 68, and the same was true for eDNA and BRUV data, both respective Good-Turing estimates would be 68. Our BRUV-based Good-Turing estimate of 26 species diverges strongly from this number. This may have several reasons. Firstly, we only inspected an isolated area in Te Wahipounamu, while the literature describes a larger area.

Secondly, bait in BRUV does not attract all fish for the camera, particularly if deployed at limited depth range, as done here. For eDNA, the Good-Turing estimate of 60 species is more like the literature-inferred species count, but this could be coincidental.

How credible are eDNA derived species assignments with currently available reference data? We believe lacking eDNA reference data to restrict accurate species annotation of ASVs. There are several observations from our data that appear to support this hypothesis. First, while there is a reasonably good concordance between species identified in our BRUV analyses and species known from the area as combined from publications and OBIS, the dissimilarity between eDNA data on one side, and BRUV, OBIS and publication data on the other side, increases with decreasing taxonomic level, culminating in only two out of 44 eDNA species being either identified in our BRUV analyses or known from previous publications (Fig. 3).

Secondly, every approach to identify species diversity in a marine ecosystem has its biases, and published observations are mostly based on visual approaches. Thus, one could argue for the existence of a bias favouring similarity between our visual BRUV observations and published species occurrences to the detriment of eDNA data's similarity. However, we do not believe this circumstance alone to be responsible for a bias favouring BRUV data to be more similar with literature and OBIS observations in comparison to eDNA observations. Literature and OBIS observation methodologies extend well beyond the specific biases of BRUV, including a multitude of different observation techniques (poison stations, seine net fishing, spear fishing, diver surveys and others, SI Table 1). Collectively, all observation techniques should have provided an appropriately comprehensive overview of fish diversity in Te Wahipounamu, lacking biases inherent to BRUV.

Thirdly, some divergence between eDNA data and the other data sources may be explained by the known ability of eDNA to detect “cryptic” species that are not easily discovered by any visual surveying. The most obvious candidates for this category would be the 25 eDNA species that had previously been reported from New Zealand but not yet from Te Wahipounamu (Fig. 2). However, such a bias should not prevent a broad overlap between eDNA and visual approaches for species that can easily be detected visually. Clearly, we did not find such an overlap.

Crucially, of the 25 species we detected by BRUV and that were therefore present at the time of our concurrent water sampling for eDNA analyses, 24 species are not present in the NCBI



reference database (Fig. 2) and could therefore not be detected by our eDNA approach. This highlights one of the main limitations of eDNA multispecies surveys today.

Nevertheless, and despite the lack of reference data, eDNA still identified a larger number of species than our concurrent BRUV analyses. From where do these species assignments come? In most cases during taxonomic assignment, where no perfect match can be found between eDNA query and reference subject sequence, the algorithm assigning ASVs to species information (BLAST) chose the next-closest matching species contained in the reference data collection, as encouraged by our taxonomic assignment parameters. Our taxonomic assignments correspond with this hypothesis, as binomial regression showed that each additional gap in a sequences' reference alignment associated with a 39% increased probability of observing of a non-native species.

Interestingly, a 1% increase in alignment concordance increased the likelihood of a non-native observation as well, by 7%. At first sight this seems counter-intuitive, however the latter observation is also consistent with our hypothesis: A poorly matching sequence would not be assigned to a matching species but rather to a higher matching taxon such as genus or family. A better fit increases the likelihood of a species level assignment, but without native species contained among reference data, the likelihood increases that the query sequence is assigned to a closely related species not occurring in New Zealand. Similar observations have been made in other regions of the world (Stoeckle, Das Mishu, & Charlop-Powers, 2020).

The large number of species detected by our eDNA approach – although probably misassigned in several instances – is a testament to the potential power of eDNA methods. Arguably, any detected effect of lacking reference data could be less pronounced by using another, or multiple primer pairs. For example, our primer evaluations with the recently released software GAPeDNA (Marques et al., 2021) show that the “Fish 16S” primer set by McInnes et al. (2017) would have covered 249 instead of the 119 New Zealand marine fish species covered by our MiFish 12S dataset (SI Table 1). However, the overall conclusion remains. Of the over 1294 known New Zealand marine fish species, molecular reference data of any kind is available only for 489 species in southern New Zealand, and for no available primer pairs sufficient reference data is available. Hence without substantial effort into generating suitable reference data for a carefully selected range of similar primers, eDNA analysis here and everywhere else will remain an impaired tool for biodiversity management. While this insight holds true after almost two decades of eDNA research (Hebert, Cywinska, Ball, & DeWaard, 2003) we note that a growing number of researchers are working hard on

closing reference data voids around the globe (reviewed in Marques et al., 2021; Weigand et al., 2019).

## Acknowledgments and Data

Funded in part by the New Zealand Department of Conservation. Authors were supported by the University of Otago. Authorship determination followed the Contributor Roles Taxonomy (<https://casrai.org/credit>). P.C. lead field, lab and analysis work and wrote manuscript. M.d.L. provided Good-Turing estimates, accumulation curves and advised P.C. M.H., M.L., P.C. obtained, and M.H. viewed BRUV footage. M.H. aided DNA extraction. W.R., C.H., M.K. obtained funding. Everyone contributed to manuscript revision. We appreciate Olga Kardailsky for obtaining deceased aquarium fish, and Anya Kardailsky for helping water filtering (both University of Otago). Sequencing was undertaken by Otago Genomics. Data and code generated for this work are archived at <https://doi.org/10.5281/zenodo.4638297>.

## References

- Ausubel, J. (1999). Toward a Census of Marine Life. *Oceanography*, 12(3), 4–5. doi: 10.5670/oceanog.1999.17
- Benson, D. a, Karsch-Mizrachi, I., Lipman, D. J., Ostell, J., & Sayers, E. W. (2011). GenBank. *Nucleic Acids Research*, 39(Database issue), D32–7. doi: 10.1093/nar/gkq1079
- Bolyen, E., Rideout, J. R., Dillon, M. R., Bokulich, N. A., Abnet, C. C., Al-Ghalith, G. A., ... Caporaso, J. G. (2019). Reproducible, interactive, scalable and extensible microbiome data science using QIIME 2. *Nature Biotechnology*, 37(8), 852–857. doi: 10.1038/s41587-019-0209-9
- Callahan, B. J., McMurdie, P. J., & Holmes, S. P. (2017). Exact sequence variants should replace operational taxonomic units in marker-gene data analysis. *The ISME Journal*, 11(12), 113597. doi: 10.1038/ismej.2017.119

309 Callahan, B. J., McMurdie, P. J., Rosen, M. J., Han, A. W., Johnson, A. J. A., & Holmes, S.  
310 P. (2016). DADA2: High-resolution sample inference from Illumina amplicon data.  
311 *Nature Methods*, 13(7), 581–583. doi: 10.1038/nmeth.3869

312 Camacho, C., Coulouris, G., Avagyan, V., Ma, N., Papadopoulos, J., Bealer, K., & Madden,  
313 T. L. (2009). BLAST+: Architecture and applications. *BMC Bioinformatics*, 10(1),  
314 421. doi: 10.1186/1471-2105-10-421

315 Clarke, K. R. (1993). Non-parametric multivariate analyses of changes in community  
316 structure. *Austral Ecology*, 18(1), 117–143. doi: 10.1111/j.1442-9993.1993.tb00438.x

317 Cristescu, M. E., & Hebert, P. D. N. (2018). Uses and Misuses of Environmental DNA in  
318 Biodiversity Science and Conservation. *Annual Review of Ecology, Evolution, and*  
319 *Systematics*, 49(1), 209–230. doi: 10/gfkkjq

320 Cunningham, S. (2019). Mitigating the threat of invasive marine species to Fiordland: New  
321 Zealand’s first pathway management plan. *Management of Biological Invasions*,  
322 10(4), 690–708. doi: 10.3391/mbi.2019.10.4.07

323 Edgar, R. C., & Flyvbjerg, H. (2015). Error filtering, pair assembly and error correction for  
324 next-generation sequencing reads. *Bioinformatics*, 31(21), 3476–3482. doi:  
325 10.1093/bioinformatics/btv401

326 Federhen, S. (2012). The NCBI Taxonomy database. *Nucleic Acids Research*, 40(D1), D136–  
327 D143. doi: 10/c452q3

328 Good, I. J. (1953). The Population Frequencies of Species and the Estimation of Population  
329 Parameters. *Biometrika*, 40(3/4), 237. doi: 10/d7kccb

330 Harris, J. H. (1995). The use of fish in ecological assessments. *Austral Ecology*, 20(1), 65–80.  
331 doi: 10/d2pq6f

- 332 Hebert, P. D. N., Cywinska, A., Ball, S. L., & DeWaard, J. R. (2003). Biological  
333 identifications through DNA barcodes. *Proceedings of the Royal Society B:*  
334 *Biological Sciences*, 270(1512), 313–321. doi: 10/fnjqv7
- 335 Huson, D. H., Auch, A. F., Qi, J., & Schuster, S. C. (2007). MEGAN analysis of  
336 metagenomic data. *Genome Research*, 17(3), 377–386. doi: 10.1101/gr.5969107
- 337 Inglis, G., MAF Biosecurity New Zealand, Post-border Directorate, & MAF Biosecurity New  
338 Zealand. (2008). *Milford Sound: First baseline survey for non-indigenous marine*  
339 *species (research project ZBS2005/19)*. Wellington, N.Z.: MAF Biosecurity New  
340 Zealand. Retrieved from [https://niwa.co.nz/static/marine-](https://niwa.co.nz/static/marine-biosecurity/Inglis%20et%20al%202008%20milford%20resurvey%20report.pdf)  
341 [biosecurity/Inglis%20et%20al%202008%20milford%20resurvey%20report.pdf](https://niwa.co.nz/static/marine-biosecurity/Inglis%20et%20al%202008%20milford%20resurvey%20report.pdf)
- 342 Jaccard, P. (1912). The distribution of the flora in the Alpine zone. *New Phytologist*, 11(2),  
343 37–50. doi: 10/fvhsjd
- 344 Jack, L., & Wing, S. R. (2013). A safety network against regional population collapse:  
345 Mature subpopulations in refuges distributed across the landscape. *Ecosphere*, 4(5),  
346 57. doi: 10.1890/ES12-00221.1
- 347 Marques, V., Milhau, T., Albouy, C., Dejean, T., Manel, S., Mouillot, D., & Juhel, J.-B.  
348 (2021). GAPeDNA: Assessing and mapping global species gaps in genetic databases  
349 for eDNA metabarcoding. *Diversity and Distributions*. doi: 10.1111/ddi.13142
- 350 Martin, M. (2011). Cutadapt removes adapter sequences from high-throughput sequencing  
351 reads. *EMBnet.Journal*, 17(1), 10. doi: 10.14806/ej.17.1.200
- 352 McInnes, J. C., Jarman, S. N., Lea, M.-A., Raymond, B., Deagle, B. E., Phillips, R. A., ...  
353 Alderman, R. (2017). DNA Metabarcoding as a Marine Conservation and  
354 Management Tool: A Circumpolar Examination of Fishery Discards in the Diet of  
355 Threatened Albatrosses. *Frontiers in Marine Science*, 4, 277. doi:  
356 10.3389/fmars.2017.00277

357 Miya, M., Sato, Y., Fukunaga, T., Sado, T., Poulsen, J. Y., Sato, K., ... Iwasaki, W. (2015).  
358 MiFish, a set of universal PCR primers for metabarcoding environmental DNA from  
359 fishes: Detection of more than 230 subtropical marine species. *Royal Society Open*  
360 *Science*, 2(7), 150088. doi: 10/gmcj95

361 Roberts, CD, Stewart, A., Struthers, C., Barker, J., & Kortet, S. (2019). *Checklist of the*  
362 *Fishes of New Zealand* (No. July; p. 219). Museum of New Zealand Te Papa  
363 Tongarewa. Retrieved from Museum of New Zealand Te Papa Tongarewa website:  
364 <https://collections.tepapa.govt.nz/document/10564>

365 Roberts, Clive (Ed.). (2005). *Regional diversity and biogeography of coastal fishes on the*  
366 *West Coast South Island of New Zealand*. Wellington, N.Z: Dept. of Conservation.

367 Sigsgaard, E. E., Torquato, F., Frøslev, T. G., Moore, A. B. M., Sørensen, J. M., Range, P.,  
368 ... Thomsen, P. F. (2020). Using vertebrate environmental DNA from seawater in  
369 biomonitoring of marine habitats. *Conservation Biology*, 34(3), 697–710. doi:  
370 10/gmcj83

371 Stoeckle, M. Y., Das Mishu, M., & Charlop-Powers, Z. (2020). Improved Environmental  
372 DNA Reference Library Detects Overlooked Marine Fishes in New Jersey, United  
373 States. *Frontiers in Marine Science*, 7, 226. doi: 10.3389/fmars.2020.00226

374 Taberlet, P., Bonin, A., Zinger, L., & Coissac, E. (2018). *Environmental DNA: For*  
375 *biodiversity research and monitoring* (1st ed.). New York, NY: Oxford University  
376 Press.

377 Weigand, H., Beermann, A. J., Čiampor, F., Costa, F. O., Csabai, Z., Duarte, S., ... Ekrem, T.  
378 (2019). DNA barcode reference libraries for the monitoring of aquatic biota in  
379 Europe: Gap-analysis and recommendations for future work. *Science of the Total*  
380 *Environment*, 678, 499–524. doi: 10/c6tb

381 Wing, S. R., & Jack, L. (2013). Marine reserve networks conserve biodiversity by stabilizing  
382 communities and maintaining food web structure. *Ecosphere*, 4(11), art135. doi:  
383 10.1890/ES13-00257.1

384



# Figures and Tables

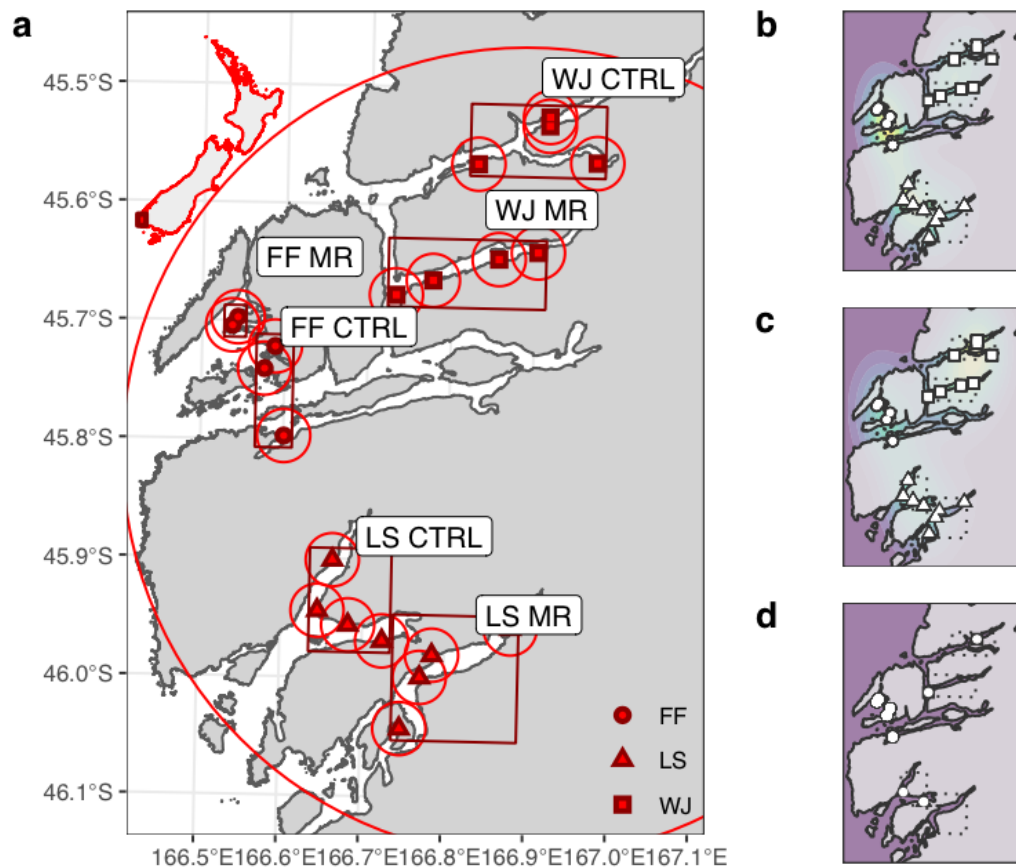

**Fig. 1:** Field work area, description, sites, and data coverage for eDNA, BRUV, and OBIS data. **a:** We obtained biodiversity information from baited remote underwater video (BRUV) footage and environmental DNA (eDNA) data from 21 field work sites across three sampling regions (highlighted by rectangles) – Five Fingers (FF), Long Sound (LS) and Wet Jacket (WJ). In each region we collected samples inside marine reserves / commercial exclusion zones (MR) and outside in control areas (CTRL). To obtain additional biodiversity information, we queried the Ocean Biodiversity Information System (OBIS – <https://obis.org/>) for records within a 2.5 km radius of each field work site (small circles) for the purpose of community structure analysis. Furthermore, we obtained OBIS records for the entire sampling region (large circle) to extend our species list alongside species mentioned across various literature sources (Table 1, SI Table 3). **b:** Environmental DNA (eDNA), and **c:** BRUV data in a spatial context, lighter colour indicates a higher density of distinct species observations (corresponding to numerical values in Fig. 2). **d:** Species data for all field work sites could not be obtained from OBIS,

401 necessitating the exclusion of this data in the statistical analyses of regional biodiversity  
402 data. Graph created using R package *ggplot2* (3.3.5).

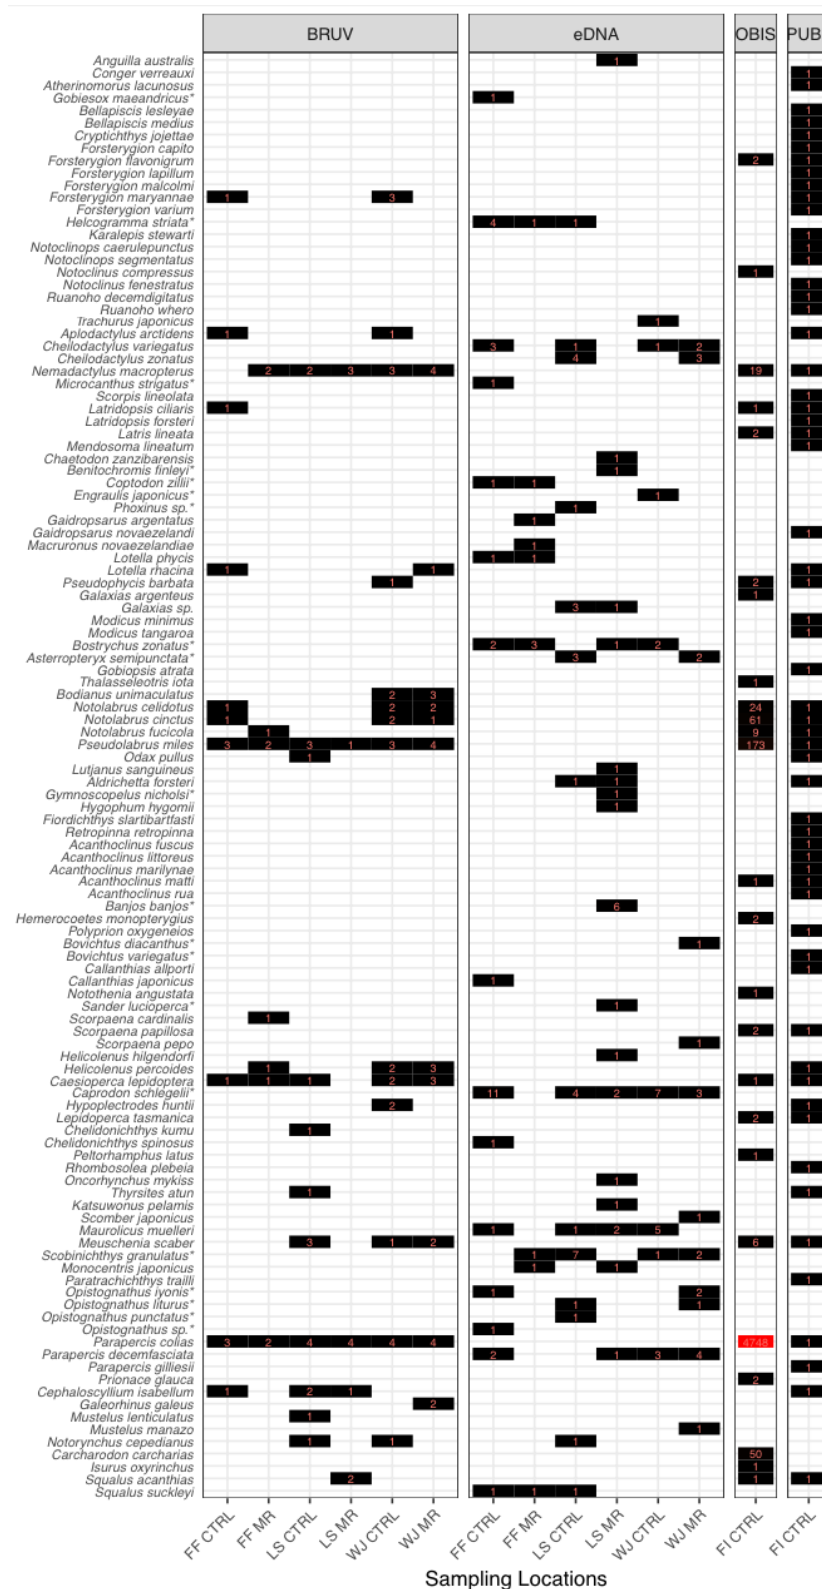

403

**Fig. 2:** Distinct species observations across data sources and field work locations. Observation types: **BRUV** – Observations from baited remote underwater surveys; **eDNA** – environmental DNA observations; **OBIS** – data retrieved from the Ocean Biodiversity Information System (<https://obis.org/>) for the area surrounding field work sites (large circle in Fig.1); **PUBL** – Fiordland fish species collated from multiple literature records as summarized by Inglis (2008). Sampling Locations: FF – Five Fingers area; LS – Long Sound area; WJ – Wet Jacket area; MR – marine reserve or commercial exclusion zone; CTRL – neither marine reserve nor commercial exclusion zone. Species list: Order follows Table 1, species not listed as New Zealand Species in (CD Roberts et al., 2019) are marked with an asterisk (\*). Graph created using R package *ggplot2* (3.3.5).

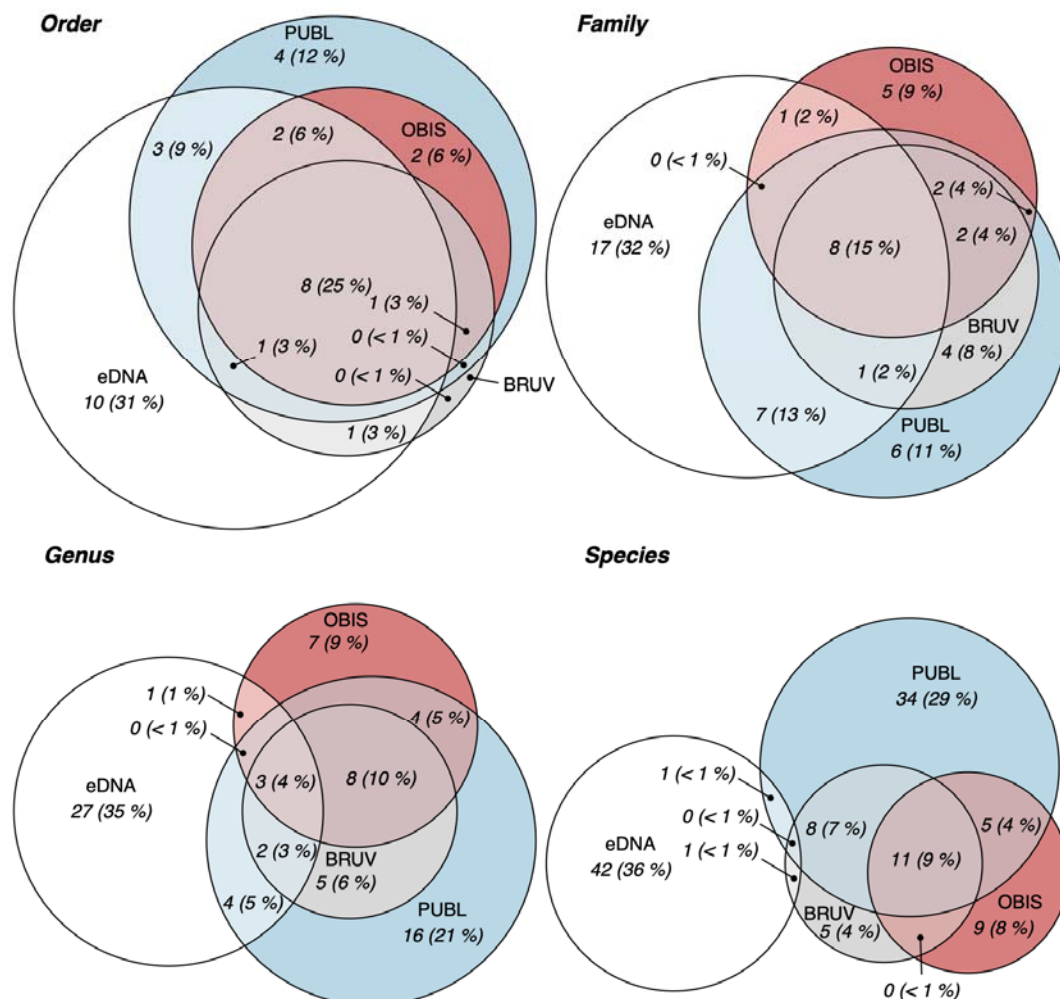

**Fig. 3:** Concordance of taxonomic information across four data sources of Fiordland fish biodiversity. Biodiversity data (Table 1, SI Table 2) is summarized at four different

taxonomic levels, shown are unique observation counts at each level, as well as the corresponding percentage of those counts in comparison to all data. Circle sizes proportional to observation count. Observation types: BRUV (grey) – Observations from baited remote underwater surveys; eDNA (white) – environmental DNA observations; OBIS (red) – data retrieved from the Ocean Biodiversity Information System (<https://obis.org/>) for the area surrounding field work sites (large circle in Fig.1); PUBL (blue) – Fiordland fish species collated from multiple literature records as summarized by (Inglis et al., 2008). Graph created using R package *eulerr* (6.1.0).

**Table 1:** Details on taxonomic observations across data sources. Taxonomic hierarchies conform with NCBI taxonomy where available, thus allow analysis in relation to environmental DNA (eDNA) data and are sorted alphabetically – the resulting species order is identical to Fig. 2. Taxa not listed as New Zealand species by Roberts et al., (2019) are highlighted with asterisk (\*). Trivial names are indicated where available from NCBI. For all taxonomic assignments also yield from eDNA we provide the alignment coverage and alignment gaps. Since identical species were assigned to multiple Amplicon Sequence Variants (ASV's; Callahan et al., 2017) in some instances, ranges are provided for alignment coverages and gap counts for species-specific alignments.

| Phylum   | Class       | Order                        | Family        | Genus                        | Species                         | Common name                   | Algn. covrg.             | Algn. gaps |
|----------|-------------|------------------------------|---------------|------------------------------|---------------------------------|-------------------------------|--------------------------|------------|
| Chordata | Actinopteri | Anguilliformes               | Anguillidae   | <i>Anguilla</i>              | <i>Anguilla australis</i>       | Australian shortfin eel       | 100%                     | 0          |
|          |             |                              | Congridae     | <i>Conger</i>                | <i>Conger verreauxi</i>         | conger eel                    |                          |            |
|          |             | Atheriniformes               | Atherinidae   | <i>Atherinomorus</i>         | <i>Atherinomorus lacunosus</i>  | hardyhead silverside          |                          |            |
|          |             |                              | Blenniiformes | Gobiesocidae                 | <i>Gobiesox</i> *               | <i>Gobiesox maeandricus</i> * | northern clingfish       | 79.3%      |
|          |             | Tripterygiidae               |               | <i>Bellapiscis</i>           | <i>Bellapiscis lesleyae</i>     | mottled twister               |                          |            |
|          |             |                              |               |                              | <i>Bellapiscis medius</i>       | twister                       |                          |            |
|          |             |                              |               |                              | <i>Cryptichthys</i>             | <i>Cryptichthys jojettae</i>  |                          |            |
|          |             |                              |               |                              | <i>Forsterygion</i>             | <i>Forsterygion capito</i>    | spotted robust triplefin |            |
|          |             |                              |               |                              | <i>Forsterygion flavonigrum</i> | yellow-and-black triplefin    |                          |            |
|          |             |                              |               | <i>Forsterygion lapillum</i> | common triplefin                |                               |                          |            |
|          |             | <i>Forsterygion malcolmi</i> |               |                              |                                 |                               |                          |            |



|                  |                |                      |                                       |                           |                |   |
|------------------|----------------|----------------------|---------------------------------------|---------------------------|----------------|---|
|                  |                |                      | <i>Forsterygion<br/>maryannae</i>     |                           |                |   |
|                  |                |                      | <i>Forsterygion<br/>varium</i>        | striped<br>triplefin      |                |   |
|                  |                | <i>Helcogramma</i> * | <i>Helcogramma<br/>striata</i> *      |                           | 88.2-<br>92.3% | 1 |
|                  |                | <i>Karalepis</i>     | <i>Karalepis<br/>stewarti</i>         |                           |                |   |
|                  |                | <i>Notoclinops</i>   | <i>Notoclinops<br/>caerulepunctus</i> |                           |                |   |
|                  |                |                      | <i>Notoclinops<br/>segmentatus</i>    |                           |                |   |
|                  |                | <i>Notoclinus</i>    | <i>Notoclinus<br/>compressus</i>      |                           |                |   |
|                  |                |                      | <i>Notoclinus<br/>fenestratus</i>     |                           |                |   |
|                  |                | <i>Ruanoho</i>       | <i>Ruanoho<br/>decemdigitatus</i>     |                           |                |   |
|                  |                |                      | <i>Ruanoho whereo</i>                 | spectacled<br>triplefin   |                |   |
| Carangiformes    | Carangidae     | <i>Trachurus</i>     | <i>Trachurus<br/>japonicus</i>        | Japanese jack<br>mackerel | 99.4%          | 0 |
| Centrarchiformes | Aplodactylidae | <i>Aplodactylus</i>  | <i>Aplodactylus<br/>arctidens</i>     |                           |                |   |

|                   |                  |                        |                                  |                     |            |   |
|-------------------|------------------|------------------------|----------------------------------|---------------------|------------|---|
|                   | Cheilodactylidae | <i>Cheilodactylus</i>  | <i>Cheilodactylus variegatus</i> |                     | 97.6-98.8% | 0 |
|                   |                  |                        | <i>Cheilodactylus zonatus</i>    | blackbarred morwong | 97-97.6%   | 0 |
|                   |                  |                        | <i>Nemadactylus macropterus</i>  | tarakihi            |            |   |
|                   | Kyphosidae       | <i>Microcanthus</i> *  | <i>Microcanthus strigatus</i> *  | stripey             | 85.3%      | 3 |
| Latridae          |                  | <i>Scorpis</i>         | <i>Scorpis lineolata</i>         | silver sweep        |            |   |
|                   |                  | <i>Latridopsis</i>     | <i>Latridopsis ciliaris</i>      | blue moki           |            |   |
|                   |                  |                        | <i>Latridopsis forsteri</i>      | bastard trumpeter   |            |   |
|                   |                  | <i>Latris</i>          | <i>Latris lineata</i>            | striped trumpeter   |            |   |
| Chaetodontiformes | Chaetodontidae   | <i>Chaetodon</i>       | <i>Mendosoma lineatum</i>        |                     |            |   |
|                   |                  |                        | <i>Chaetodon zanzibarensis</i>   |                     | 81.5%      | 4 |
|                   |                  |                        |                                  |                     |            |   |
| Cichliformes      | Cichlidae        | <i>Benitochromis</i> * | <i>Benitochromis finleyi</i> *   |                     | 79.4%      | 0 |
|                   |                  | <i>Coptodon</i> *      | <i>Coptodon zillii</i> *         | redbelly tilapia    | 90.6%      | 3 |

|                 |                |                     |                                   |                          |          |   |
|-----------------|----------------|---------------------|-----------------------------------|--------------------------|----------|---|
| Clupeiformes    | Engraulidae    | <i>Engraulis</i> *  | <i>Engraulis japonicus</i> *      | Japanese anchovy         | 98.8%    | 0 |
| Cypriniformes   | Cyprinidae     | <i>Phoxinus</i> *   | <i>Phoxinus sp.*</i>              |                          | 97.1%    | 0 |
| Gadiformes      | Gaidropsaridae | <i>Gaidropsarus</i> | <i>Gaidropsarus argentatus</i>    | Arctic rockling          | 90.1%    | 1 |
|                 |                |                     | <i>Gaidropsarus novaezealandi</i> |                          |          |   |
|                 | Merlucciidae   | <i>Macruronus</i>   | <i>Macruronus novaezealandiae</i> | blue grenadier           | 100%     | 0 |
|                 | Moridae        | <i>Lotella</i>      | <i>Lotella phycis</i>             |                          | 95.9%    | 0 |
|                 |                |                     | <i>Lotella rhacina</i>            | rock cod                 |          |   |
|                 |                | <i>Pseudophycis</i> | <i>Pseudophycis barbata</i>       | southern bastard codling |          |   |
| Galaxiiformes   | Galaxiidae     | <i>Galaxias</i>     | <i>Galaxias argenteus</i>         |                          |          |   |
|                 |                |                     | <i>Galaxias sp.</i>               |                          | 96.5%    | 0 |
| Gobiesociformes | Gobiesocidae   | <i>Modicus</i>      | <i>Modicus minimus</i>            |                          |          |   |
|                 |                |                     | <i>Modicus tangaroa</i>           |                          |          |   |
| Gobiiformes     | Eleotridae     | <i>Bostrychus</i> * | <i>Bostrychus zonatus</i> *       | barred gudgeon           | 85.4-86% | 5 |

|                |                     |                        |                                     |                       |            |   |
|----------------|---------------------|------------------------|-------------------------------------|-----------------------|------------|---|
|                | Gobiidae            | <i>Asterropteryx</i> * | <i>Asterropteryx semipunctata</i> * | starry goby           | 81.9-82.5% | 6 |
|                |                     | <i>Gobiopsis</i>       | <i>Gobiopsis atrata</i>             |                       |            |   |
|                | Thalasseleotrididae | <i>Thalasseleotris</i> | <i>Thalasseleotris iota</i>         |                       |            |   |
| Labriiformes   | Labridae            | <i>Bodianus</i>        | <i>Bodianus unimaculatus</i>        | red pigfish           |            |   |
|                |                     | <i>Notolabrus</i>      | <i>Notolabrus celidotus</i>         | New Zealand spotty    |            |   |
|                |                     |                        | <i>Notolabrus cinctus</i>           |                       |            |   |
|                |                     |                        | <i>Notolabrus fucicola</i>          | yellow-saddled wrasse |            |   |
|                |                     | <i>Pseudolabrus</i>    | <i>Pseudolabrus miles</i>           |                       |            |   |
|                | Odacidae            | <i>Odax</i>            | <i>Odax pullus</i>                  | greenbone             |            |   |
| Lutjaniformes  | Lutjanidae          | <i>Lutjanus</i>        | <i>Lutjanus sanguineus</i>          | humphead snapper      | 80.8%      | 6 |
| Mugiliformes   | Mugilidae           | <i>Aldrichetta</i>     | <i>Aldrichetta forsteri</i>         | yellow-eye mullet     | 96-100%    | 0 |
| Myctophiformes | Myctophidae         | <i>Gymnoscopelus</i> * | <i>Gymnoscopelus nicholsi</i> *     |                       | 79.8%      | 1 |

|                |               |                      |                                     |              |   |
|----------------|---------------|----------------------|-------------------------------------|--------------|---|
|                |               | <i>Hygophum</i>      | <i>Hygophum hygomi</i>              | 78.7%        | 3 |
| Ophidiiformes  | Bythitidae    | <i>Fiordichthys</i>  | <i>Fiordichthys slartibartfasti</i> |              |   |
| Osmeriformes   | Retropinnidae | <i>Retropinna</i>    | <i>Retropinna retropinna</i>        | cucumberfish |   |
| Ovalentaria    | Plesiopidae   | <i>Acanthoclinus</i> | <i>Acanthoclinus fuscus</i>         |              |   |
|                |               |                      | <i>Acanthoclinus littoreus</i>      |              |   |
|                |               |                      | <i>Acanthoclinus marilynae</i>      |              |   |
|                |               |                      | <i>Acanthoclinus matti</i>          |              |   |
|                |               |                      | <i>Acanthoclinus rua</i>            |              |   |
| Pempheriformes | Banjosidae    | <i>Banjos*</i>       | <i>Banjos banjos*</i>               | 84.7-85.2%   | 0 |
|                | Percophidae   | <i>Hemerocoetes</i>  | <i>Hemerocoetes monopterygius</i>   |              |   |
|                | Polyprionidae | <i>Polyprion</i>     | <i>Polyprion oxygeneios</i>         |              |   |
| Perciformes    | Bovichtidae   | <i>Bovichtus*</i>    | <i>Bovichtus diacanthus*</i>        | 94.1%        | 0 |

|               |                    |                                |                      |            |     |
|---------------|--------------------|--------------------------------|----------------------|------------|-----|
|               |                    | <i>Bovichtus variegatus</i> *  | thornfish            |            |     |
| Callanthiidae | <i>Callanthias</i> | <i>Callanthias allporti</i>    |                      |            |     |
|               |                    | <i>Callanthias japonicus</i>   |                      | 95.2%      | 1   |
| Nototheniidae | <i>Notothenia</i>  | <i>Notothenia angustata</i>    | Maori chief          |            |     |
| Percidae      | <i>Sander</i> *    | <i>Sander lucioperca</i> *     | pikeperch            | 81.4%      | 3   |
| Scorpaenidae  | <i>Scorpaena</i>   | <i>Scorpaena cardinalis</i>    | red rock cod         |            |     |
|               |                    | <i>Scorpaena papillosa</i>     |                      |            |     |
|               |                    | <i>Scorpaena pepo</i>          | pumpkin scorpionfish | 85.7%      | 0   |
| Sebastidae    | <i>Helicolenus</i> | <i>Helicolenus hilgendorfi</i> |                      | 95.4%      | 0   |
|               |                    | <i>Helicolenus percoides</i>   |                      |            |     |
| Serranidae    | <i>Caesioperca</i> | <i>Caesioperca lepidoptera</i> |                      |            |     |
|               | <i>Caprodon</i> *  | <i>Caprodon schlegelii</i> *   | sunrise perch        | 90.6-98.2% | 0-2 |



|                   |                 |                        |                                 |                      |            |      |
|-------------------|-----------------|------------------------|---------------------------------|----------------------|------------|------|
|                   |                 | <i>Hypoplectrodes</i>  | <i>Hypoplectrodes huntii</i>    |                      |            |      |
|                   |                 | <i>Lepidoperca</i>     | <i>Lepidoperca tasmanica</i>    |                      |            |      |
|                   | Triglidae       | <i>Chelidonichthys</i> | <i>Chelidonichthys kumu</i>     | bluefin gurnard      |            |      |
|                   |                 |                        | <i>Chelidonichthys spinosus</i> | red gurnard          | 99.4%      | 0    |
| Pleuronectiformes | Rhombosoleidae  | <i>Peltorhamphus</i>   | <i>Peltorhamphus latus</i>      | speckled sole        |            |      |
|                   |                 | <i>Rhombosolea</i>     | <i>Rhombosolea plebeia</i>      | New Zealand flounder |            |      |
| Salmoniformes     | Salmonidae      | <i>Oncorhynchus</i>    | <i>Oncorhynchus mykiss</i>      | rainbow trout        | 100%       | 0    |
| Scombriformes     | Gempylidae      | <i>Thyrsites</i>       | <i>Thyrsites atun</i>           | snoek                |            |      |
|                   | Scombridae      | <i>Katsuwonus</i>      | <i>Katsuwonus pelamis</i>       | skipjack tuna        | 95.9%      | 0    |
|                   |                 | <i>Scomber</i>         | <i>Scomber japonicus</i>        | chub mackerel        | 100%       | 0    |
| Stomiiformes      | Sternoptychidae | <i>Maurolicus</i>      | <i>Maurolicus muelleri</i>      | pearlsides           | 86.3-99.4% | 0-10 |
| Tetraodontiformes | Monacanthidae   | <i>Meuschenia</i>      | <i>Meuschenia scaber</i>        | velvet leatherjacket |            |      |

|                |                    |                 |                         |                                   |                      |            |     |
|----------------|--------------------|-----------------|-------------------------|-----------------------------------|----------------------|------------|-----|
|                |                    |                 | <i>Scobinichthys</i> *  | <i>Scobinichthys granulatus</i> * | rough leatherjacket  | 98.8-99.4% | 0   |
|                | Trachichthyiformes | Monocentridae   | <i>Monocentris</i>      | <i>Monocentris japonicus</i>      |                      | 94.4-97.6% | 2-3 |
|                |                    | Trachichthyidae | <i>Paratrachichthys</i> | <i>Paratrachichthys trailli</i>   | sandpaper fish       |            |     |
|                | undefined          | Opistognathidae | <i>Opistognathus</i> *  | <i>Opistognathus iyonis</i> *     |                      | 89.9-90.5% | 2-3 |
|                |                    |                 |                         | <i>Opistognathus liturus</i> *    | seto-amadai          | 89.3-90.5% | 2   |
|                |                    |                 |                         | <i>Opistognathus punctatus</i> *  | finespotted jawfish  | 81.7%      | 5   |
|                |                    |                 |                         | <i>Opistognathus sp.*</i>         |                      | 85.7%      | 2   |
|                | Uranoscopiformes   | Pinguipedidae   | <i>Parapercis</i>       | <i>Parapercis colias</i>          | New Zealand blue cod |            |     |
|                |                    |                 |                         | <i>Parapercis decemfasciata</i>   |                      | 80.9%      | 1   |
|                |                    |                 |                         | <i>Parapercis gilliesii</i>       | yellow weaver        |            |     |
| Chondrichthyes | Carcharhiniformes  | Carcharhinidae  | <i>Prionace</i>         | <i>Prionace glauca</i>            | blue shark           |            |     |
|                |                    | Scyliorhinidae  | <i>Cephaloscyllium</i>  | <i>Cephaloscyllium isabellum</i>  |                      |            |     |

|                |             |                    |                               |                              |       |   |
|----------------|-------------|--------------------|-------------------------------|------------------------------|-------|---|
|                | Triakidae   | <i>Galeorhinus</i> | <i>Galeorhinus galeus</i>     | tope shark                   |       |   |
|                |             | <i>Mustelus</i>    | <i>Mustelus lenticulatus</i>  | spotted estuary smooth-hound |       |   |
|                |             |                    | <i>Mustelus manazo</i>        | starspotted smooth-hound     | 98.9% | 0 |
| Hexanchiformes | Hexanchidae | <i>Notorynchus</i> | <i>Notorynchus cepedianus</i> | broadnose sevengill shark    | 98.4% | 0 |
| Lamniformes    | Alopiidae   | <i>Carcharodon</i> | <i>Carcharodon carcharias</i> | great white shark            |       |   |
|                |             | <i>Isurus</i>      | <i>Isurus oxyrinchus</i>      | shortfin mako shark          |       |   |
| Squaliformes   | Squalidae   | <i>Squalus</i>     | <i>Squalus acanthias</i>      | spiny dogfish                |       |   |
|                |             |                    | <i>Squalus suckleyi</i>       | Puget Sound dogfish          | 100%  | 0 |

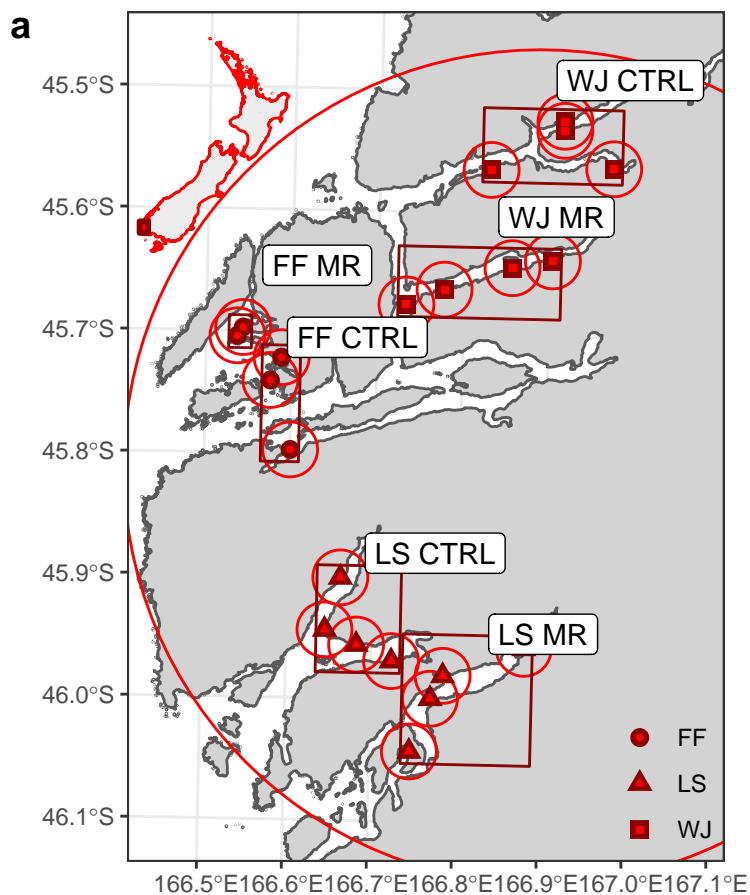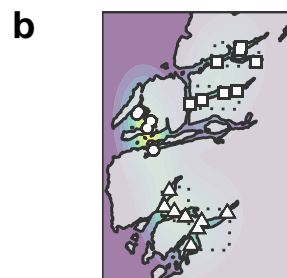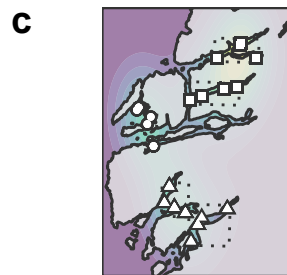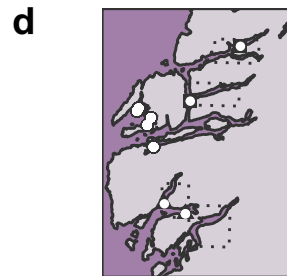

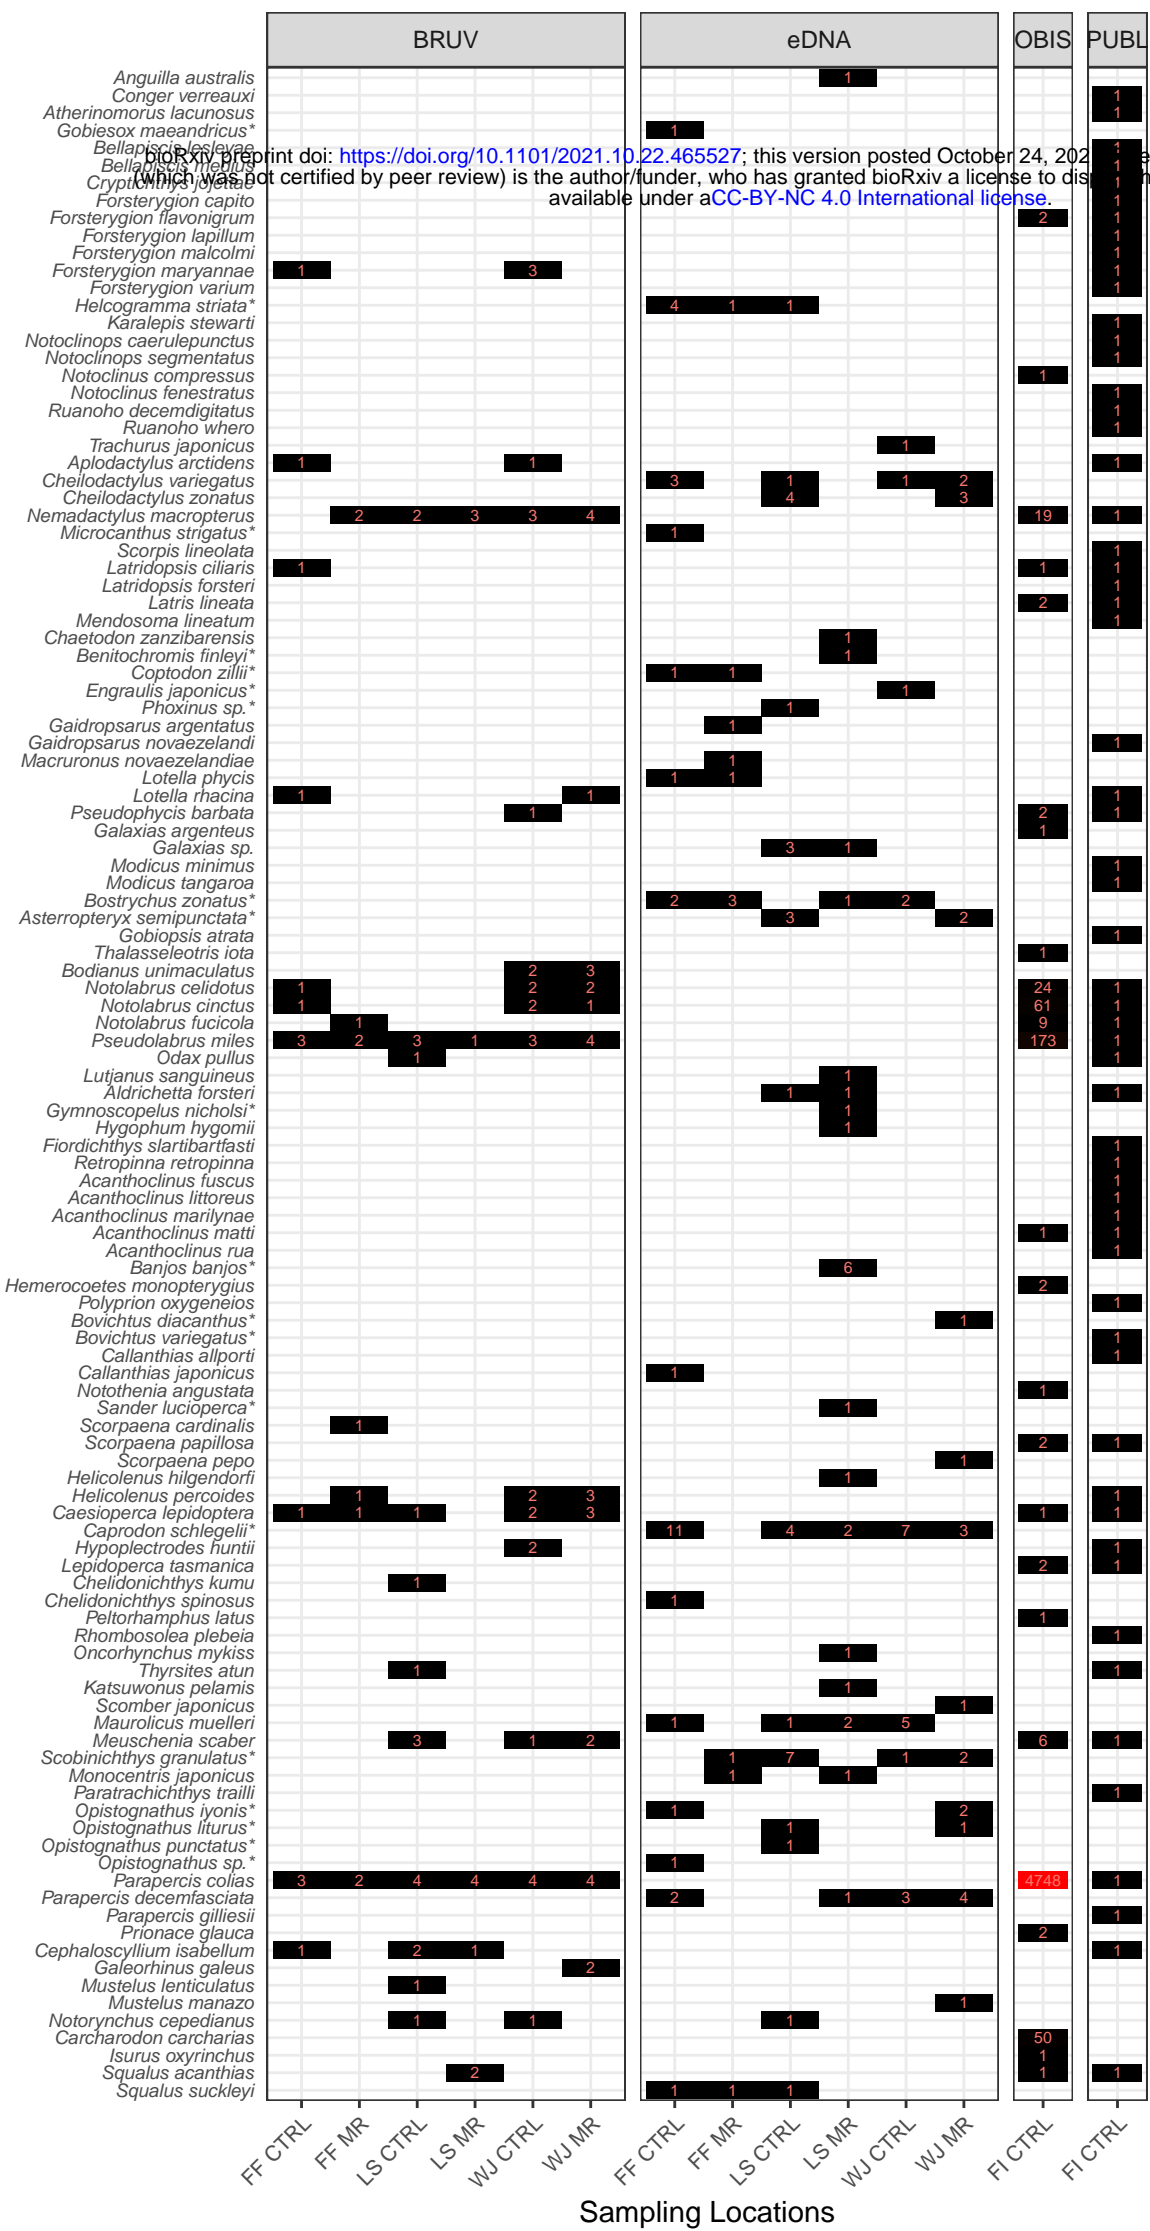

Sampling Locations

## Order

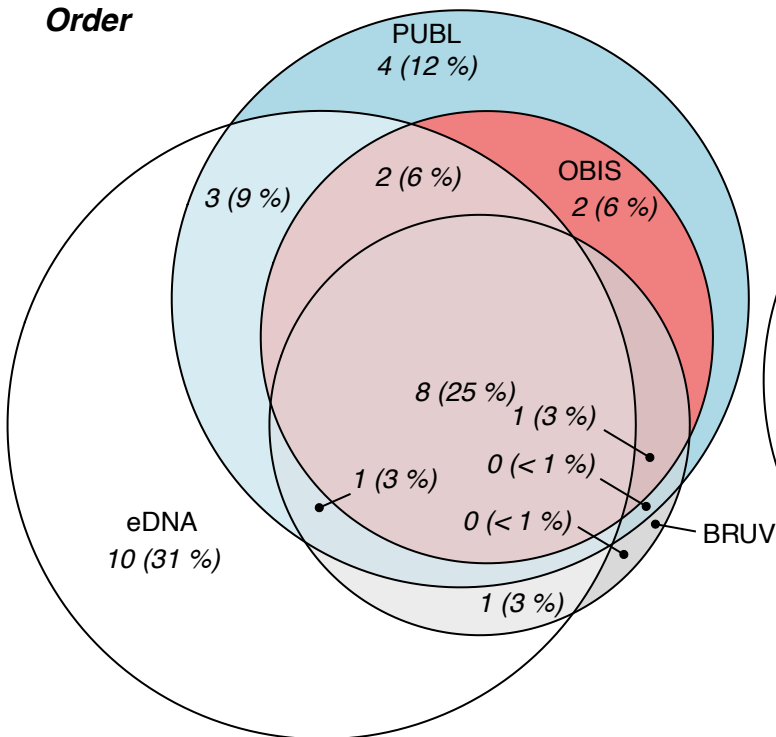

## Family

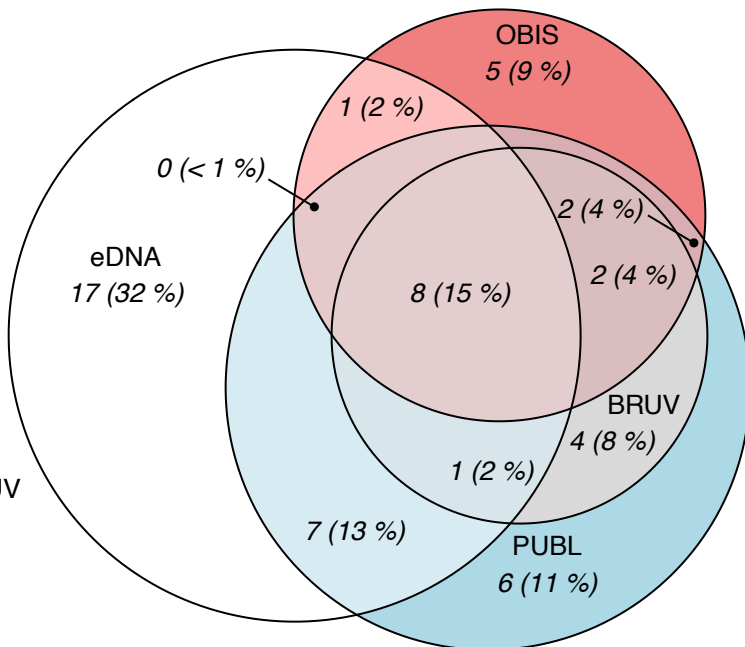

## Genus

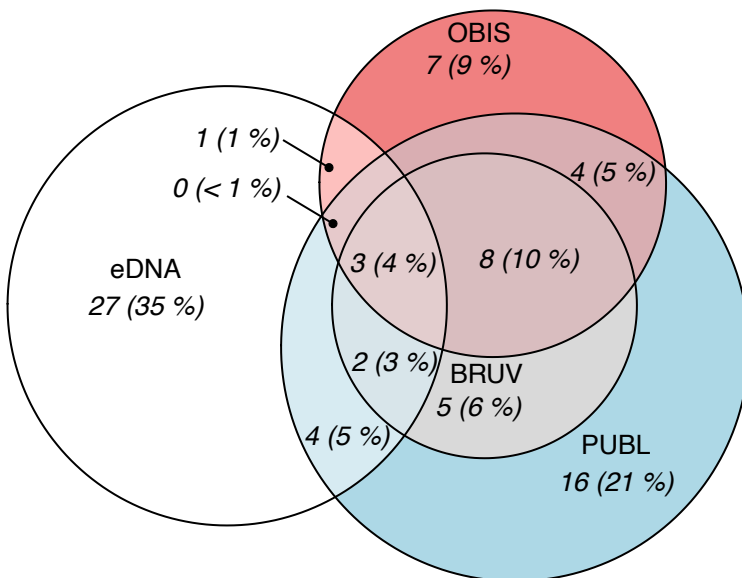

## Species

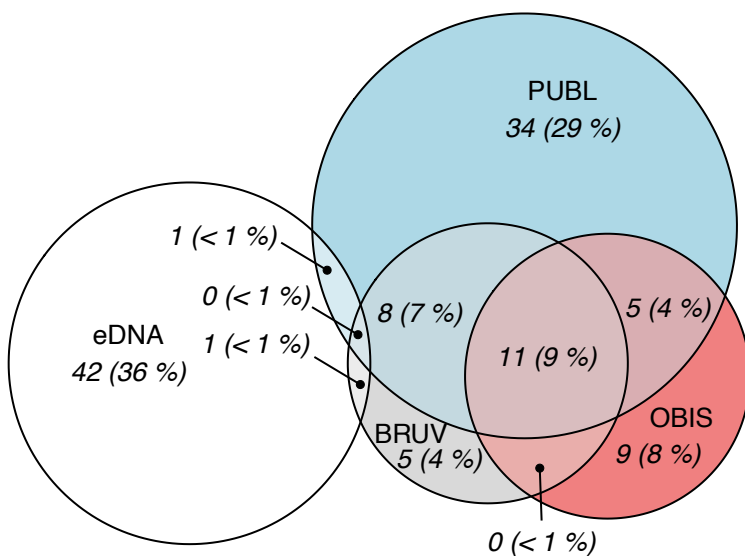

Source: https://www.biorxiv.org/content/10.1101/2021.10.22.465527v1.full.pdf
