# Supplementary material for: Environmental DNA analysis needs local reference data to inform taxonomy-based conservation policy – A case study from Aotearoa / New Zealand
Source: bioRxiv or medRxiv preprint supplement (doi:10.1101/2021.10.22.465527), 2021-10-24
Supplement: Supplementary file [file media-1.pdf]

Supplementary information\*

Environmental DNA needs reference data for taxonomy-based  
conservation policy – A case study from Te Wahipounamu,  
Aotearoa / New Zealand

Paul Czechowski, Michel de Lange, Michael Heldsinger, Will Rayment,  
Christopher Hepburn, Monique Ladds, and Michael Knapp

October 22, 2021

## Contents

|                                                     |          |
|-----------------------------------------------------|----------|
| Contents                                            | 1        |
| List of Figures                                     | 2        |
| List of Tables                                      | 2        |
| <b>1 Materials and methods</b>                      | <b>2</b> |
| Data collation and analysis . . . . .               | 2        |
| Field work . . . . .                                | 3        |
| Primer selection and <i>in silico</i> PCR . . . . . | 4        |
| Environmental DNA data processing . . . . .         | 4        |
| Indicator species analysis . . . . .                | 5        |
| Binomial regression . . . . .                       | 5        |
| <b>2 Results</b>                                    | <b>6</b> |
| Primer selection and <i>in silico</i> PCR . . . . . | 6        |
| Environmental DNA data processing . . . . .         | 6        |
| Summaries of taxonomic observations . . . . .       | 7        |
| Species accumulation curves . . . . .               | 9        |
| DNA sequence alignments . . . . .                   | 9        |
| ANOSIM results . . . . .                            | 9        |

---

\*Please also consult the supplementary online materials at <https://doi.org/10.5281/zenodo.4638297> for tables, figures, code, and data.

|    |                                      |    |
|----|--------------------------------------|----|
| 25 | Indicator species analysis . . . . . | 11 |
| 26 | Binomial regression . . . . .        | 11 |

|    |                   |           |
|----|-------------------|-----------|
| 27 | <b>References</b> | <b>11</b> |
|----|-------------------|-----------|

|    |                                 |           |
|----|---------------------------------|-----------|
| 28 | <b>A Taxonomic observations</b> | <b>16</b> |
|----|---------------------------------|-----------|

## 29 List of Figures

|    |                                                                                    |    |
|----|------------------------------------------------------------------------------------|----|
| 30 | 1 Sampling locations for BRUV and eDNA data collection in Te Wahipounamu . . . . . | 3  |
| 31 | 2 <i>In silico</i> PCR of used primer pairs . . . . .                              | 4  |
| 32 | 3 Families among raw eDNA data . . . . .                                           | 5  |
| 33 | 4 Families among clean eDNA data . . . . .                                         | 7  |
| 34 | 5 Species accumulation curves . . . . .                                            | 9  |
| 35 | 6 Alignment examples. . . . .                                                      | 10 |
| 36 | 7 Summary of binomial regression . . . . .                                         | 12 |
| 37 | 8 Binomial regression odds ratios . . . . .                                        | 12 |

## 38 List of Tables

|    |                                                                  |    |
|----|------------------------------------------------------------------|----|
| 39 | 1 Primer evaluation . . . . .                                    | 6  |
| 40 | 2 Observation methods across literature sources . . . . .        | 8  |
| 41 | 3 Summary of ANOSIM results . . . . .                            | 11 |
| 42 | 4 Details on taxonomic observations across data sources. . . . . | 17 |

# 43 1 Materials and methods

## 44 Data collation and analysis

45 All analyses were conducted in R (R Core Development Team, 2019) and Megan (Huson et al., 2016) of  
46 increasing versions. Packages used for analysis in R included *curl*, *data.table*, *decontam*, *dplyr*, *flextable*,  
47 *future.apply*, *ggpubr*, *grid*, *gridExtra*, *indicspecies*, *janitor*, *knitr*, *magick*, *magrittr*, *officer*, *openxlsx*, *phyloseq*,  
48 *primerTree*, *readxl*, *reshape2*, *robis*, *sf*, *sjPlot*, *sp*, *taxize*, *taxonomizr*, *tidyr*, *tidyverse*, *vegan* and *xaringan*  
49 (Auguie, 2017; Bache and Wickham, 2020; Bengtsson, 2021; B. Callahan and Davis, 2021; Chamberlain et al.,  
50 2020; Dowle and Srinivasan, 2021; Firke, 2021; Gohel, 2021a; Gohel, 2021b; Hester, 2020; Kassambara, 2020;  
51 Lüdecke, 2021; McMurdie et al., 2021; Oksanen et al., 2015; Ooms, 2021a; Ooms, 2021b; Pebesma, 2021;  
52 Pebesma and Bivand, 2021; Provoost and Bosch, 2021; Schaubberger and Walker, 2021; Sherrill-Mix, 2021;  
53 Wickham, 2020; Wickham, 2021a; Wickham, 2021b; Wickham and Bryan, 2019; Wickham, François, et al.,  
54 2021; Xie, 2021a; Xie, 2021b).

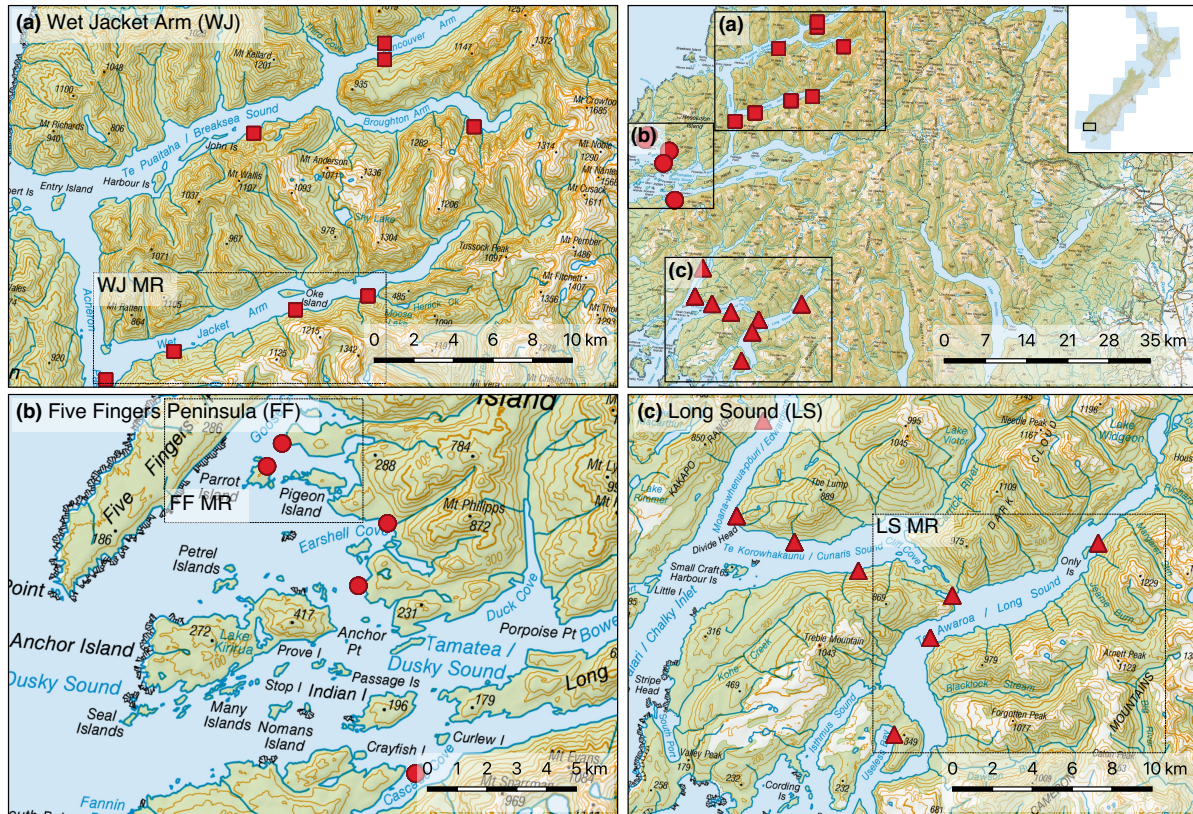

**Figure 1:** Sampling locations for BRUV and eDNA data collection in Te Wahipounamu, New Zealand. We analyzed species observations from 21 locations. Within each of the three sampling regions (WJ, FF, and LS), samples collected inside MRs are delineated by hatched rectangles, control samples are outside of rectangles. Base layer sourced from the LINZ Data Service licensed for reuse under CC BY 4.0.

## 55 Field work

56 To obtain eDNA at each sampling location (Fig.1), duplicates of 900 ml water portions were collected using  
 57 a bleached Niskin Bottle, passed through separate 0.22  $\mu\text{m}$  Sterivex columns (Merck, US-NJ) using sterile  
 58 disposable 50 ml syringes, akin to Jeunen et al. (2020). To control contamination, negative controls were  
 59 obtained after every second sample by passing molecular grade distilled water through third columns. After  
 60 filtering, columns were filled with 5 ml Longmire's solution, sealed, and stored at 4°C for 21 days and -20°C  
 61 subsequently (Majaneva et al., 2018).

62 BRUV footage was obtained for one hour using two waterproof cameras, recording at 1080p resolution,  
 63 at 60 frames per second, 40 cm apart, at a converging angle of 8°, aided by two 300 lm lights. We filmed a  
 64 permeable plastic container suspended 1.2 m below the cameras, carrying 500g bait (*Sardinops sagax*), akin to  
 65 (Jeunen et al., 2020). Video footage were analyses by eye, taxonomic observations were formalized for further  
 66 analysis using the NCBI taxonomy database (Federhen, 2012) and R package *taxonomizr* (Sherrill-Mix, 2021).

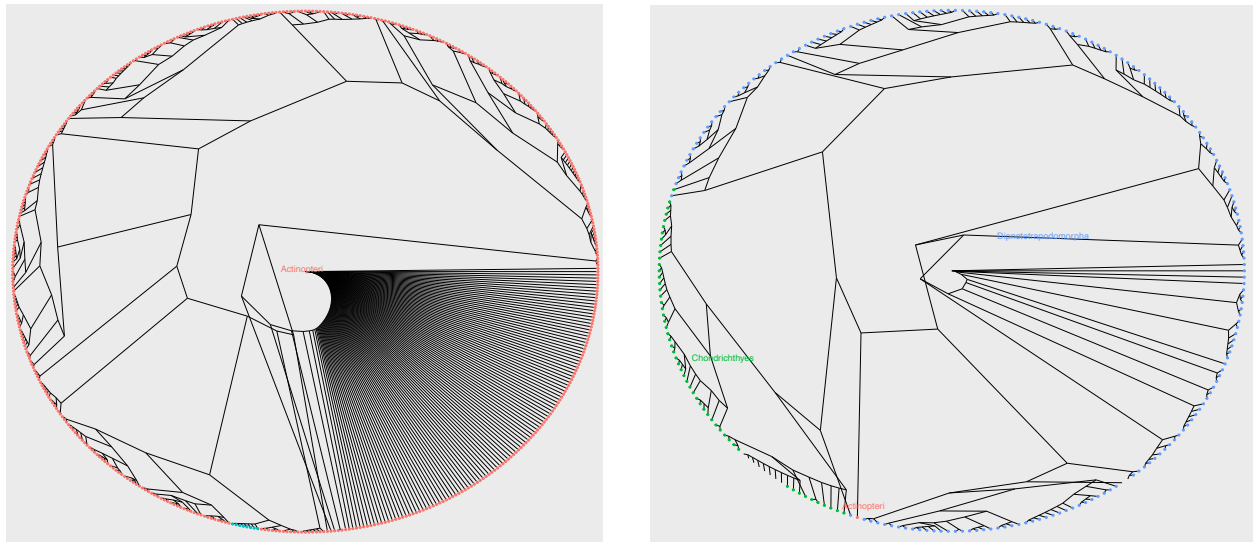

(a) Mifish U: ray-finned fish, tetrapods and lungfish.

(b) Elas02: cartilaginous and ray-finned fish, tetrapods, and lungfish

**Figure 2:** *In silico* PCR of used primer pairs: Likely amplification specificity of Mifish U and Elas02.

## 67 Primer selection and *in silico* PCR

68 Primer selection was verified using GAPeDNA v.1.0.1 (<https://shiny.cefe.cnrs.fr/GAPeDNA/>; Marques et al.  
 69 2021) and Scite (Nicholson et al., 2021). We assessed our primer selection by initially evaluating online information  
 70 provided by GAPeDNA with regards to reference data coverage for marine fish in the southern New Zealand  
 71 province for all primer pairs listed. Subsequently, we retrieved the number of publications referencing the  
 72 work introducing the primers.

73 *In silico* PCR of primers “MiFish-U” (Miya et al., 2015) and “Elas02” (Taberlet et al., 2018) was performed  
 74 with R package *primerTree* (Hester, 2020) with default parameters (500 alignments, three possible mismatches).

75

## 76 Environmental DNA data processing

77 Amplicon Sequence Variants (ASV’s *sensu* B. J. Callahan, McMurdie, and Holmes 2017) were generated from  
 78 raw sequence data including use of Qiime v2 2020-08 (Bolyen et al., 2019). Initially, sequence quality was  
 79 checked with FastQC (Andrews, 2010) as called by MultiQC (Ewels et al., 2016). We then used Cutadapt  
 80 v3.0 (Martin, 2011) to deconvolute samples, while not allowing for any mismatches, and choosing an Expected  
 81 Error value (Edgar and Flyvbjerg, 2015) of zero, to obtain high quality data.

82 Deconvoluted data were imported into Qiime and denoised (Rosen et al., 2012) using the DADA2 algorithm  
 83 (v1.10.0; B. J. Callahan, McMurdie, Rosen, et al. 2016). Taxonomic annotation of denoised sequence data was  
 84 obtained using Blast 2.10.0+ (Camacho et al., 2009) and a recent copy (April 2020) of the NCBI nucleotide  
 85 collection (Benson et al., 2011) excluding environmental samples, while requiring a minimum identity 75%, a  
 86 minimum query coverage of 95% and an e-value of  $10^{-10}$ , retaining the first high-scoring alignment of each  
 87 query-subject pair based on Bit-score (see Fig. 3 on the next page for raw data summary). To mitigate impact





**Table 1:** Evaluation of primer selection through GAPeDNA v.1.0.1 (<https://shiny.cefe.cnrs.fr/GAPeDNA/>; Marques et al. 2021). Listed is reference data coverage for marine fish in the southern New Zealand province as provided by the web tool, and citation count of primer references. GAPeDNA lists 489 sequenced species for southern New Zealand (11-Sep-2021). Citation counts obtained 13-Sep-2021. Total distinct citations as estimated by Scite (Nicholson et al., 2021).

| Primer region | primer   | species sequenced | reference                            | citations             |
|---------------|----------|-------------------|--------------------------------------|-----------------------|
| 12S           | ACMDB    | 27% (134)         | Bylemans et al. 2018                 | 45                    |
|               | Ac12S    | 29% (141)         | Evans et al. 2016                    | 229                   |
|               | Am12S    | 25% (124)         | Evans et al. 2016                    | 229                   |
|               | -        | 31% (154)         | Kelly et al. 2014                    | 263                   |
|               | MiFish-U | 24% (119)         | Miya et al. 2015                     | 378                   |
|               | Teleo    | 24% (117)         | Valentini et al. 2016                | 545                   |
| 16S           | -        | 51% (249)         | DiBattista et al. 2017               | 42                    |
|               | Ac16S    | 19% (95)          | Evans et al. 2016                    | 229                   |
|               | Ve16S    | 36% (177)         | Evans et al. 2016                    | 229                   |
|               | -        | 29% 144           | Kitano et al. 2007                   | 148                   |
|               | Fish     | 51% (249)         | McInnes et al. 2017                  | 23                    |
|               | ar / br  | 21% (101)         | Palumbi 1996                         | <i>undeterminable</i> |
|               | -        | 51% (249)         | Shaw et al. 2016                     | 141                   |
| COI           | coi1     | 6% (29)           | Ivanova et al. 2007                  | 877                   |
|               | vf1d     | 16% (80)          | Ivanova et al. 2007                  | 877                   |
|               | F1       | 10% (48)          | Ward et al. 2005                     | 2 327                 |
|               | F2       | 6% (30)           | Ward et al. 2005                     | 2 327                 |
| CytB          | -        | 13% (66)          | Kocher et al. 1989                   | 3 536                 |
|               | -        | 17% (85)          | <i>M. Miya - undeterminable</i>      | <i>undeterminable</i> |
|               | 2cb      | 8% (41)           | Thomsen et al. 2012                  | 521                   |
|               | 2de      | 15% (74)          | Thomsen et al. 2012                  | 521                   |
|               | cb       | 7% (36)           | Thomsen et al. 2012                  | 521                   |
| 18S           | -        | 2% (11)           | <i>J. McDondald - undeterminable</i> | <i>undeterminable</i> |

## 2 Results

### Primer selection and *in silico* PCR

Results of our primer assessment are shown in Table 1. *In silico* analyses found the employed primers to amplify some tetrapods as shown in Fig. 2 on page 4.

### Environmental DNA data processing

The denoised, quality-filtered sequenced data consisted of 3 877 007 sequences across 125 samples and 2 139 ASV's (436 Eukaryota, as well as 1 703 non-eukaryote, i.e. Bacteria, Viruses, and undefined taxa; furthermore taxa across 5 super-phyyla, 31 phyla, 56 classes, 151 orders, 254 families, 426 genera, and 914 species). Sample mean coverage was 31 016 reads (min.: 1, med.: 2 001, max.: 272 614, standard deviation 54 592), and ASV mean (min, median, max) coverage was 1 812 reads (min.: 1, med.: 18, max.: 803 140, standard deviation 24 270).

Notable contaminants most likely introduced during water filtering (and subsequently removed) included *Homo sapiens* (human, 30 1070 reads), and *Cervus elaphus* (red deer, 19 372 reads). Low abundant ASVs



**Table 2:** Observation methods across literature sources and **OBIS**: Species observations listed in CD Roberts et al. (2019) for all of New Zealand were not used as part of the literature corpus analyses of Te Wahipounamu, but only to confirm native status of eDNA assignments.

| Data source               | Observation methods                                                                                               |
|---------------------------|-------------------------------------------------------------------------------------------------------------------|
| Inglis et al. 2008        | literature survey, poison stations and beach seine netting                                                        |
| Grange (1985)             | unknown                                                                                                           |
| Mladenov (2001)           | unknown                                                                                                           |
| Clive Roberts (2005)      | Rotenone ichthyocide, spear gun, fishing with baited lines                                                        |
| Wing and Jack (2013)      | diving surveys for conspicuous reef fish                                                                          |
| <b>OBIS</b>               | 6 192 human observations, 62 machine observations, 59 preserved specimen                                          |
| CD Roberts et al. (2019)* | voucher specimen described by taxonomic ichthyologist, validated species from literature, clear published account |

144 *Odax pullus*, *Parapercis cobias*, *Parapercis gilliesii*, *Paratrachichthys trailli*, *Meuschenia scaber*, *Patiriella regu-*  
145 *laris*, *Polyprion oxygeneios*, *Pseudolabrus miles*, *Pseudophycis barbata*, *Retropinna retropinna*, *Rhombosolea*  
146 *plebeia*, *Ruanoho decemdigitatus*, *Ruanoho whero*, *Scorpaena papillosa*, *Scorpiis lineolata*, *Squalus acanthias*,  
147 and *Thyrssites atun*. Observation methods for these species are listed in Table 2.

148 Notable taxa observed during environmental DNA (eDNA) processing included<sup>12</sup>

- 149 • in field controls: *Homo sapiens*<sup>♣</sup>, *Cervus elaphus*<sup>♣</sup>, *Serranidae* sp., *Poecilia reticulata*<sup>♣</sup>, *Pictilabrus*  
150 *laticlavius*<sup>\*</sup>
- 151 • in positive controls: *Poecilia reticulata*<sup>♣</sup>, *Chromobotia macracanthus*<sup>\*</sup>, *Poecilia latipinna*<sup>♣</sup>, *Poecilia*  
152 *formosa*<sup>♣</sup>, *Corydoras aeneus*<sup>\*</sup>
- 153 • in negative controls: *Homo sapiens*<sup>♣</sup>, *Pictilabrus laticlavius*<sup>\*</sup>, *Poecilia latipinna*<sup>♣</sup>

154 Actinopteri obtained through eDNA analysis and video footage included:

- 155 • in reserves, but not outside: *Anguilla australis*, *Banjios banjos*, *Benitochromis finleyi*, *Bovichtus diacan-*  
156 *thus*, *Chaetodon zanzibarensis*, *Gaidropsarus argentatus*, *Gymnoscopelus nicholsi*, *Helicolenus hilgendorfi*,  
157 *Hygophum hygomii*, *Katsuwonos pelamis*, *Lutjanus sanguineus*, *Macruronus novaezelandiae*, *Monocentris*  
158 *japonicus*, *Notolabrus fucicola*, *Oncorhynchus mykiss*, *Sander lucioperca*, *Scomber japonicus*, *Scorpaena*  
159 *cardinalis*, *Scorpaena pepo*
- 160 • outside reserves, but not inside: *Aplodactylus arctidens*, *Callanthias japonicus*, *Chelidonichthys kumu*,  
161 *Chelidonichthys spinosus*, *Engraulis japonicus*, *Forsterygion maryannae*, *Gobiesox maeandricus*, *Hy-*  
162 *poptelectrodes huntii*, *Latridopsis ciliaris*, *Microcanthus strigatus*, *Odax pullus*, *Opistognathus punctatus*,  
163 *Opistognathus* sp., *Phoxinus* sp., *Pseudophycis barbata*, *Thyrssites atun*, *Trachurus japonicus*

<sup>1</sup>observations ordered by descending read abundance

<sup>2</sup>Taxon lists follow NCBI taxonomy (Federhen, 2012). Genera and species are known in Aotearoa / New Zealand (CD Roberts et al., 2019) unless indicated with an asterisk (“\*”) or not a “fish” (“♣”), or freshwater taxa (“♣”).



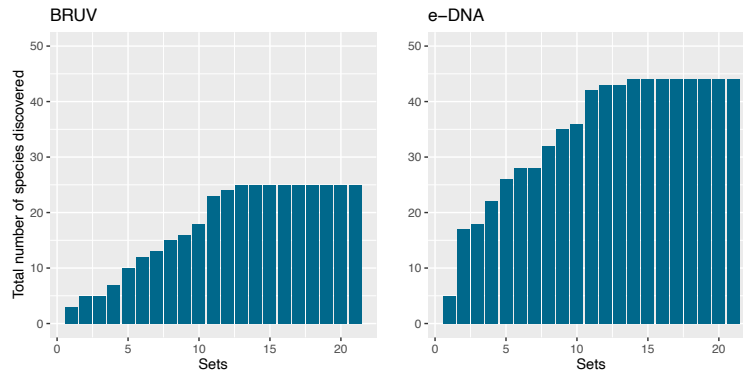

**Figure 5:** Species accumulation curves for BRUV and eDNA

- both inside and outside marine reserves: *Aldrichetta forsteri*, *Asterropteryx semipunctata*, *Bodianus unimaculatus*, *Bostrychus zonatus*, *Caesioperca lepidoptera*, *Caprodon schlegelii*, *Cheilodactylus variegatus*, *Cheilodactylus*, *zonatus*, *Coptodon zillii*, *Galaxias* sp. ('southern'), *Helcogramma striata*, *Helicolenus percoides*, *Lotella phycis*, *Lotella rhacina*, *Maurolucus muelleri*, *Meuschenia scaber*, *Nemadactylus macropterus*, *Notolabrus celidotus*, *Notolabrus cinctus*, *Opistognathus iyonis*, *Opistognathus liturus*, *Parapercis cobias*, *Parapercis decemfasciata*, *Pseudolabrus miles*, *Scobinichthys granulatus*

## 170 Species accumulation curves

171 Species accumulation curves for BRUV and eDNA data are shown in Fig. 5.

## 172 DNA sequence alignments

173 Amplicon sequence variants affected by gaps in alignments for taxonomic assignments included, in part, those  
 174 belonging to families Callanthiidae, Chaetodontidae, Cichlidae, Eleotridae, Gaidropsaridae, Gobiesocidae,  
 175 Gobiidae, Kyphosidae, Lutjanidae, Monocentridae, Myctophidae, Opistognathidae, Percidae, Pinguipedidae,  
 176 Serranidae, Sternoptychidae, and Tripterygiidae.

177 Amplicon sequence variants affected by imperfect query coverage included, in part, those belonging to  
 178 families Anguillidae, Banjosidae, Bovichtidae, Callanthiidae, Carangidae, Chaetodontidae, Cheilodactyli-  
 179 dae, Cichlidae, Cyprinidae, Eleotridae, Engraulidae, Gaidropsaridae, Galaxiidae, Gobiesocidae, Gobiidae,  
 180 Hexanchidae, Kyphosidae, Lutjanidae, Merlucciidae, Monacanthidae, Monocentridae, Moridae, Mugilidae,  
 181 Myctophidae, Opistognathidae, Percidae, Pinguipedidae, Salmonidae, Scombridae, Scorpaenidae, Sebastidae,  
 182 Serranidae, Squalidae, Sternoptychidae, Triakidae, Triglidae, and Tripterygiidae.

183 Alignments for *Arctocephalus forsteri* (New Zealand fur seal), *Balaenoptera musculus* (blue whale), and  
 184 *Tursiops truncatus* (bottlenose dolphin) are shown in Fig. 6 on the following page.

## 185 ANOSIM results

186 ANOSIM results are summarized in Table 3 on page 11.

```

750_125_single_end_e3-seq_blast-noenv.xml.maf
  Taxonomy
    Arctocepalus forsteri [2]
      @daa4a78c7301b9aeff406ca8b3c5e [length=168, matches=5]
      DATA [length=168]
      Arctocepalus forsteri; score=304.0
      >Arctocepalus forsteri isolate NZF528 mitochondrion, complete genome gi|1001823670|gb|KT693360.1| acc|KT693360
      Length = 16568
      Score = 304 bits (336), Expect = 0
      Identities = 168/168 (100%), Gaps = 0/168 (0%)
      Strand = Plus / Plus
      Query: 1 CACCGCGGTACATGATTAACCCAACTAACGGCCACGGCGTAAAGCGTGTAAAGATTATCAACACTAAAGTTAAATTTAACCAAGCCGTAAAAGCCACCGTTATACAAAATA 120
      Sbjct: 324 CACCGCGGTACATGATTAACCCAACTAACGGCCACGGCGTAAAGCGTGTAAAGATTATCAACACTAAAGTTAAATTTAACCAAGCCGTAAAAGCCACCGTTATACAAAATA 443
      Query: 121 TACTACGAAAGTACTTTACTACTCTGATTACACGATAGTAGAACC 168
      Sbjct: 444 TACTACGAAAGTACTTTACTACTCTGATTACACGATAGTAGAACC 491
      > Arctocepalus forsteri; score=304.0
      > Arctocepalus forsteri; score=304.0
      > Arctocepalus forsteri; score=304.0
      > Arctocepalus forsteri; score=304.0
      > Arctocepalus forsteri; score=304.0
    d1f916b1aed530cb1923785e70e170 [length=168, matches=5]
      DATA [length=168]
      Arctocepalus forsteri; score=304.0
      >Arctocepalus forsteri isolate NZF533 mitochondrion, complete genome gi|1001823726|gb|KT693365.1| acc|KT693365
      Length = 16569
      Score = 304 bits (336), Expect = 0
      Identities = 168/168 (100%), Gaps = 0/168 (0%)
      Strand = Plus / Plus
      Query: 1 CACCGCGGTACATGATTAACCCAACTAACGGCCACGGCGTAAAGCGTGTAAAGATTATTAACACTAAAGTTAAATTTAACCAAGCCGTAAAAGCCACCGTTATACAAAATA 120
      Sbjct: 324 CACCGCGGTACATGATTAACCCAACTAACGGCCACGGCGTAAAGCGTGTAAAGATTATTAACACTAAAGTTAAATTTAACCAAGCCGTAAAAGCCACCGTTATACAAAATA 443
      Query: 121 TACTACGAAAGTACTTTACTACTCTGATTACACGATAGTAGAACC 168
      Sbjct: 444 TACTACGAAAGTACTTTACTACTCTGATTACACGATAGTAGAACC 491
      > Arctocepalus forsteri; score=304.0
      > Arctocepalus forsteri; score=304.0
      > Arctocepalus forsteri; score=304.0
      > Arctocepalus forsteri; score=300.0
  
```

(a) *Arctocepalus forsteri*

```

750_125_single_end_e3-seq_blast-noenv.xml.maf
  Taxonomy
    Balaenoptera [1]
      Z20F8674b8542f842cb3f1cbe568c3e4 [length=170, matches=5]
      DATA [length=170]
      Balaenoptera musculus; score=308.0
      >Balaenoptera musculus mitochondrial DNA complete genome gi|414126|emb|XJ2204.1| acc|XJ2204
      Length = 16402
      Score = 308 bits (340), Expect = 0
      Identities = 170/170 (100%), Gaps = 0/170 (0%)
      Strand = Plus / Plus
      Query: 1 CACCGCGGTACATGATTAACCCAAATTAAGAAACACGGCGTAAAGAGTGTAAAGAGTCTCATAGAATAAAGTCAACCTTAATTAAGCTGTAAAAGCCATAATTAATAAAGCC 120
      Sbjct: 743 CACCGCGGTACATGATTAACCCAAATTAAGAAACACGGCGTAAAGAGTGTAAAGAGTCTCATAGAATAAAGTCAACCTTAATTAAGCTGTAAAAGCCATAATTAATAAAGCC 862
      Query: 121 AAACCTAGAAAGTACTTTAATATGATCTGATCAGACAGCAGTAAGATC 170
      Sbjct: 863 AAACCTAGAAAGTACTTTAATATGATCTGATCAGACAGCAGTAAGATC 912
      > Balaenoptera musculus; score=303.0
      > Balaenoptera borealis; score=285.0
      > Balaenoptera omurai; score=285.0
      >Balaenoptera omurai mitochondrial DNA, complete genome, isolate: NSMT-32992 gi|98265620|dbj|AB201257.1| acc|AB201257
      Length = 16404
      Score = 285 bits (315), Expect = 0
      Identities = 165/170 (97%), Gaps = 0/170 (0%)
      Strand = Plus / Plus
      Query: 1 CACCGCGGTACATGATTAACCCAAATTAAGAAACACGGCGTAAAGAGTGTAAAGAGTCTCATAGAATAAAGTCAACCTTAATTAAGCTGTAAAAGCCATAATTAATAAAGCC 120
      Sbjct: 322 CACCGCGGTACATGATTAACCCAAATTAAGAAACACGGCGTAAAGAGTGTAAAGAGTCTCATAGAATAAAGTCAACCTTAATTAAGCTGTAAAAGCCATAATTAATAAAGCC 441
      Query: 121 AAACCTAGAAAGTACTTTAATATGATCTGATCAGACAGCAGTAAGATC 170
      Sbjct: 442 AAACCTAGAAAGTACTTTAATATGATCTGATCAGACAGCAGTAAGATC 491
      > Balaenoptera omurai; score=285.0
  
```

(b) *Balaenoptera musculus*

```

750_125_single_end_e3-seq_blast-noenv.xml.maf
  Taxonomy
    Tursiops truncatus [1]
      d26313c10c0e939a42c32765437db728 [length=171, matches=5]
      DATA [length=171]
      Tursiops truncatus; score=310.0
      >Tursiops truncatus isolate OM_Tt_109 NADH dehydrogenase subunit 6 (ND6) gene, partial cds; tRNA-Glu gene, complete
      sequence; cytochrome b (CYTB) gene, partial cds; D-loop, tRNA-Phe, 12S ribosomal RNA, and tRNA-Val genes, complete
      sequence; and 16S ribosomal RNA gene, partial sequence; mitochondrial gi|1367973882|gb|MG762991.1| acc|MG762991
      Length = 4440
      Score = 310 bits (342), Expect = 0
      Identities = 171/171 (100%), Gaps = 0/171 (0%)
      Strand = Plus / Plus
      Query: 1 CACCGCGGTACATGATTAACCCAACTAAAGAAACACGGCGTAAAGAGTGTCAAGAAACAATATAAAAAAAGTCAACCTTAATTAAGCTGTAAAAGCCATAATTAATAAAGT 120
      Sbjct: 2968 CACCGCGGTACATGATTAACCCAACTAAAGAAACACGGCGTAAAGAGTGTCAAGAAACAATATAAAAAAAGTCAACCTTAATTAAGCTGTAAAAGCCATAATTAATAAAGT 3087
      Query: 121 TAAACTAGAAAGTACTTTACCATAACTGAATACAGCACTAAGACC 171
      Sbjct: 3088 TAAACTAGAAAGTACTTTACCATAACTGAATACAGCACTAAGACC 3138
      > Tursiops truncatus; score=310.0
      > Tursiops truncatus; score=310.0
      > Tursiops truncatus; score=310.0
      > Tursiops truncatus; score=310.0
  
```

(c) *Tursiops truncatus*

**Figure 6:** Alignment examples (a) for *Arctocepalus forsteri* (New Zealand fur seal), (b) *Balaenoptera musculus* (blue whale), and (c) *Tursiops truncatus* (bottlenose dolphin), as exported from Megan (Huson et al., 2016).

**Table 3:** Summary of ANOSIM (Clarke, 1993) results. Results are shown for Jaccard (Jaccard, 1912) distances of fish species observations between field work data sets, based on different grouping variables. Sets aggregated by grouping variables were used for permutation testing. Significant values derived from permutation testing within grouping variable (n = 9999).

| Replication over | Tax. level | Location grouping      | Obs. method | ANOSIM R     | Significance |
|------------------|------------|------------------------|-------------|--------------|--------------|
| SET.ID           | SPECIES    | RESERVE.GROUP.LOCATION | eDNA        | 0.113618524  | 0.1401       |
|                  | GENUS      |                        |             | 0.129317111  | 0.1066       |
|                  | FAMILY     |                        |             | 0.116758242  | 0.1349       |
|                  | ORDER      |                        |             | 0.090266876  | 0.1763       |
|                  | SPECIES    | RESERVE.GROUP.INSIDE   |             | -0.075454545 | 0.8757       |
|                  | GENUS      |                        |             | -0.042090909 | 0.7155       |
|                  | FAMILY     |                        |             | -0.030363636 | 0.6528       |
|                  | ORDER      |                        |             | 0.003454545  | 0.4354       |
|                  | SPECIES    | RESERVE.GROUP.LOCATION | BRUV        | 0.383437991  | 0.0005       |
|                  | GENUS      |                        |             | 0.410518053  | 0.0003       |
|                  | FAMILY     |                        |             | 0.410518053  | 0.0004       |
|                  | ORDER      |                        |             | 0.289246468  | 0.0039       |
|                  | SPECIES    | RESERVE.GROUP.INSIDE   |             | 0.106272727  | 0.0758       |
|                  | GENUS      |                        |             | 0.075818182  | 0.1296       |
|                  | FAMILY     |                        |             | 0.095727273  | 0.0855       |
|                  | ORDER      |                        |             | 0.064727273  | 0.1503       |

## 187 Indicator species analysis

188 Indicator species analysis saw *Bodianus unimaculatus* (red hogfish) non-randomly common at WJ CTRL+WJ  
 189 MR (stat 0.725,  $p$  0.0282). On genus level, *Bodianus* (hogfish) appeared non-randomly at WJ CTRL+WJ  
 190 MR (statistic 0.725,  $p$  0.03). At family level, Labridae (wrasses) appeared associated with FF CTRL+FF  
 191 MR+WJ CTRL+WJ MR (stat 0.725,  $p$  0.0385). At order level Perciformes was common at FF MR+WJ  
 192 CTRL+WJ MR (statistic 0.699,  $p$  0.0301).

## 193 Binomial regression

194 Regression analysis is summarized in Fig. 7 on the following page. Model coefficients are summarized in Fig.  
 195 8 on the next page.

## 196 References

- 197 Andrews, S. (2010). FastQC: A quality control tool for high throughput sequence data.
- 198 Augue, B. (2017). *Gridextra: Miscellaneous functions for "grid" graphics*. R package version 2.3. Retrieved  
 199 from <https://CRAN.R-project.org/package=gridExtra>
- 200 Bache, S. M., & Wickham, H. (2020). *Magrittr: A forward-pipe operator for r*. R package version 2.0.1.  
 201 Retrieved from <https://CRAN.R-project.org/package=magrittr>
- 202 Bengtsson, H. (2021). *Future.apply: Apply function to elements in parallel using futures*. R package version  
 203 1.8.1. Retrieved from <https://CRAN.R-project.org/package=future.apply>
- 204 Benson, D. a., Karsch-Mizrachi, I., Lipman, D. J., Ostell, J., & Sayers, E. W. (2011). GenBank. *Nucleic acids  
 205 research*, 39, D32–7. ISBN: 03051048. doi:10.1093/nar/gkq1079

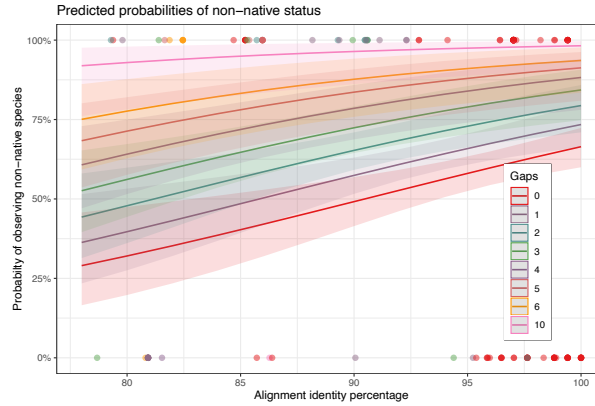

**Figure 7:** Summary of binomial regression. The response variable was non-native status of eDNA detected species (TRUE: eDNA derived species assignment not in CD Roberts et al. (2019), 19 species among 53 ASVs; FALSE: 25 species among 39 ASVs), predictor variables were the number of alignment gaps and alignment query coverage (%), the number of trials were defined using by numbers of locations at which each assigned species was seen. Graph created using R package *sjPlot* (2.8.0).

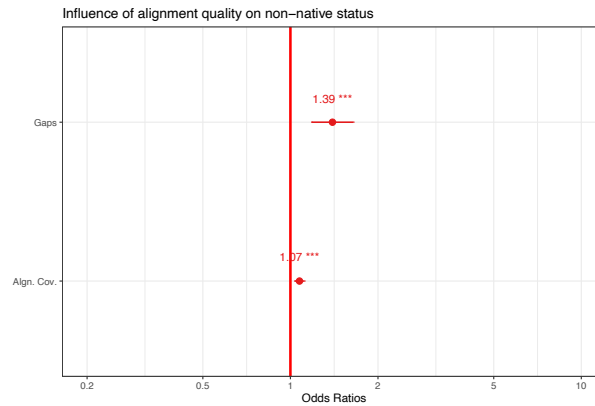

**Figure 8:** Relationship between non-native status (CD Roberts et al., 2019), gaps, and alignment coverage. The further the odds ratio from 1, the more pronounced the effect.



- 206 Bolyen, E., Rideout, J. R., Dillon, M. R., Bokulich, N. A., Abnet, C. C., Al-Ghalith, G. A., . . . Caporaso,  
207 J. G. (2019). Reproducible, interactive, scalable and extensible microbiome data science using QIIME 2.  
208 *Nature Biotechnology*, *37*(8), 852–857. doi:10/gf5292
- 209 Bylemans, J., Gleeson, D. M., Hardy, C. M., & Furlan, E. (2018). Toward an ecoregion scale evaluation of  
210 eDNA metabarcoding primers: A case study for the freshwater fish biodiversity of the murray-darling  
211 basin (australia). *Ecology and Evolution*, 1–16. doi:10/gfdrgt
- 212 Callahan, B., & Davis, N. M. (2021). *Decontam: Identify contaminants in marker-gene and metagenomics*  
213 *sequencing data*. R package version 1.12.0. Retrieved from <https://github.com/benjjneb/decontam>
- 214 Callahan, B. J., McMurdie, P. J., & Holmes, S. P. (2017). Exact sequence variants should replace operational  
215 taxonomic units in marker-gene data analysis. *The ISME Journal*, *11*(12), 113597. ISBN: 1751-7370  
216 Publisher: Nature Publishing Group. doi:10/gcnwrw
- 217 Callahan, B. J., McMurdie, P. J., Rosen, M. J., Han, A. W., Johnson, A. J. A., & Holmes, S. P. (2016).  
218 DADA2: High-resolution sample inference from illumina amplicon data. *Nature Methods*, *13*(7), 581–583.  
219 ISBN: 1548-7105 (Electronic)\$\backslash\$backslash\$r1548-7091 (Linking) \_eprint: 15334406. doi:10/f84fxp
- 220 Camacho, C., Coulouris, G., Avagyan, V., Ma, N., Papadopoulos, J., Bealer, K., & Madden, T. L. (2009).  
221 BLAST+: Architecture and applications. *BMC Bioinformatics*, *10*(1), 421. ISBN: 1471210510. doi:10/  
222 cnjxgz
- 223 Chamberlain, S., Szoecs, E., Foster, Z., & Arendsee, Z. (2020). *Taxize: Taxonomic information from around*  
224 *the web*. R package version 0.9.99. Retrieved from <https://CRAN.R-project.org/package=taxize>
- 225 Clarke, K. R. (1993). Non-parametric multivariate analyses of changes in community structure. *Austral*  
226 *Ecology*, *18*(1), 117–143. doi:10.1111/j.1442-9993.1993.tb00438.x
- 227 De Cáceres, M., Legendre, P., & Moretti, M. (2010). Improving indicator species analysis by combining groups  
228 of sites. *Oikos*, *119*(10), 1674–1684. doi:10.1111/j.1600-0706.2010.18334.x
- 229 DiBattista, J. D., Coker, D. J., Sinclair-Taylor, T. H., Stat, M., Berumen, M. L., & Bunce, M. (2017).  
230 Assessing the utility of eDNA as a tool to survey reef-fish communities in the Red Sea. *Coral Reefs*,  
231 *36*(4), 1245–1252. doi:10.1007/s00338-017-1618-1
- 232 Dowle, M., & Srinivasan, A. (2021). *Data.table: Extension of ‘data.frame’*. R package version 1.14.0. Retrieved  
233 from <https://CRAN.R-project.org/package=data.table>
- 234 Edgar, R. C., & Flyvbjerg, H. (2015). Error filtering, pair assembly and error correction for next-generation  
235 sequencing reads. *Bioinformatics*, *31*(21), 3476–3482. ISBN: 1367-4803. doi:10/gdq95z
- 236 Evans, N. T., Olds, B. P., Renshaw, M. A., Turner, C. R., Li, Y., Jerde, C. L., . . . Lodge, D. M. (2016).  
237 Quantification of mesocosm fish and amphibian species diversity via environmental DNA metabarcoding.  
238 *Molecular Ecology Resources*, *16*(1), 29–41. ISBN: 1755-098X. doi:10/gg3njr
- 239 Ewels, P., Magnusson, M., Lundin, S., & KÄ€ller, M. (2016). MultiQC: Summarize analysis results for  
240 multiple tools and samples in a single report. *Bioinformatics*, *32*(19), 3047–3048. doi:10/f3s996
- 241 Federhen, S. (2012). The NCBI taxonomy database. *Nucleic Acids Research*, *40*, D136–D143. doi:10/c452q3
- 242 Firke, S. (2021). *Janitor: Simple tools for examining and cleaning dirty data*. R package version 2.1.0. Retrieved  
243 from <https://github.com/sfirke/janitor>
- 244 Gohel, D. (2021a). *Flextable: Functions for tabular reporting*. R package version 0.6.7. Retrieved from  
245 <https://CRAN.R-project.org/package=flextable>

246 Gohel, D. (2021b). *Officer: Manipulation of microsoft word and powerpoint documents*. R package version  
247 0.3.19. Retrieved from <https://CRAN.R-project.org/package=officer>

248 Grange, K. R. (1985). *The intertidal ecology of the soft shores of freshwater basin, milford sound. report*  
249 *prepared by the new zealand oceanographic institute for the department of lands and survey*. New Zealand  
250 Oceanographic Institute. Wellington, New Zealand.

251 Hester, J. (2020). *Primertree: Visually assessing the specificity and informativeness of primer pairs*. R package  
252 version 1.0.5. Retrieved from <https://CRAN.R-project.org/package=primerTree>

253 Huson, D. H., Beier, S., Flade, I., Gjøerkska, A., El-Hadidi, M., Mitra, S., . . . Tappu, R. (2016). MEGAN  
254 community edition - interactive exploration and analysis of large-scale microbiome sequencing data.  
255 *PLOS Computational Biology*, 12(6), e1004957. doi:10/gfzpk5

256 Inglis, G., Post-border Directorate, & MAF Biosecurity New Zealand. (2008). *Milford sound: First baseline*  
257 *survey for non-indigenous marine species (research project ZBS2005/19)*. OCLC: 702296120. Wellington,  
258 N.Z.: MAF Biosecurity New Zealand. Retrieved August 5, 2021, from [http://www.biosecurity.govt.nz/  
259 files/pests/salt-freshwater/milford-2008-resurvey-report.pdf](http://www.biosecurity.govt.nz/files/pests/salt-freshwater/milford-2008-resurvey-report.pdf)

260 Ivanova, N. V., Zemlak, T. S., Hanner, R. H., & Hebert, P. D. N. (2007). Universal primer cocktails for fish  
261 DNA barcoding. *Molecular Ecology Notes*, 7(4), 544–548. doi:10.1111/j.1471-8286.2007.01748.x

262 Jaccard, P. (1912). The distribution of the flora in the alpine zone. *New Phytologist*, 11(2), 37–50. doi:10/fvhsjd

263 Jeunen, G.-J., Urban, L., Lewis, R., Knapp, M., Lamare, M., Rayment, W., . . . Gemmell, N. (2020). Marine  
264 environmental DNA (eDNA) for biodiversity assessments: A one-to-one comparison between eDNA and  
265 baited remote underwater video (BRUV) surveys. doi:10.22541/au.160278512.26241559/v1

266 Kassambara, A. (2020). *Ggpubr: Ggplot2 based publication ready plots*. R package version 0.4.0. Retrieved  
267 from <https://rpkgs.datanovia.com/ggpubr/>

268 Kelly, R. P., Port, J. A., Yamahara, K. M., & Crowder, L. B. (2014). Using Environmental DNA to Census  
269 Marine Fishes in a Large Mesocosm. *PLOS ONE*, 9(1), e86175. doi:10.1371/journal.pone.0086175

270 Kitano, T., Umetsu, K., Tian, W., & Osawa, M. (2007). Two universal primer sets for species identification  
271 among vertebrates. *International Journal of Legal Medicine*, 121(5), 423–427. doi:10.1007/s00414-006-  
272 0113-y

273 Kocher, T. D., Thomas, W. K., Meyer, A., Edwards, S. V., Piñero, S., Villablanca, F. X., & Wilson,  
274 A. C. (1989). Dynamics of mitochondrial DNA evolution in animals: Amplification and sequencing with  
275 conserved primers. *Proceedings of the National Academy of Sciences*, 86(16), 6196–6200. Publisher:  
276 National Academy of Sciences Section: Research Article. doi:10/c2hk4r

277 Lüdecke, D. (2021). *Sjplot: Data visualization for statistics in social science*. R package version 2.8.9. Retrieved  
278 from <https://strengjacke.github.io/sjPlot/>

279 Majaneva, M., Diserud, O. H., Eagle, S. H. C., Bostrić, E., Hajibabaei, M., & Ekrem, T. (2018). Environ-  
280 mental DNA filtration techniques affect recovered biodiversity. *Scientific Reports*, 8(1), 4682. ISBN:  
281 4159801823052. doi:10/gc7tf2

282 Marques, V., Milhau, T., Albouy, C., Dejean, T., Manel, S., Mouillot, D., & Juhel, J.-B. (2021). GAPeDNA:  
283 Assessing and mapping global species gaps in genetic databases for eDNA metabarcoding. *Diversity and*  
284 *Distributions*. Place: Hoboken Publisher: Wiley WOS:000629615300001. doi:10.1111/ddi.13142

285 Martin, M. (2011). Cutadapt removes adapter sequences from high-throughput sequencing reads. *EMB-*  
286 *net.journal*, 17(1), 10. \_eprint: ISSN 2226-6089. doi:10.14806/ej.17.1.200

287 McInnes, J. C., Jarman, S. N., Lea, M.-A., Raymond, B., Deagle, B. E., Phillips, R. A., ... Alderman,  
288 R. (2017). DNA Metabarcoding as a Marine Conservation and Management Tool: A Circumpolar  
289 Examination of Fishery Discards in the Diet of Threatened Albatrosses. *Frontiers in Marine Science*, 4,  
290 277. doi:10.3389/fmars.2017.00277

291 McMurdie, P. J., Holmes, S., with contributions from Gregory Jordan, & Chamberlain, S. (2021). *Phyloseq:*  
292 *Handling and analysis of high-throughput microbiome census data*. R package version 1.36.0. Retrieved  
293 from <http://dx.plos.org/10.1371/journal.pone.0061217>

294 Miya, M., Sato, Y., Fukunaga, T., Sado, T., Poulsen, J. Y., Sato, K., ... Iwasaki, W. (2015). MiFish, a set of  
295 universal PCR primers for metabarcoding environmental DNA from fishes: Detection of more than 230  
296 subtropical marine species. *Royal Society Open Science*, 2(7), 150088. ISBN: 2054-5703. doi:10/gmcj95

297 Mladenov, P. V. (2001). New zealand fiords: Researching, managing, and conserving a unique ecosystem. *New*  
298 *Zealand Journal of Marine and Freshwater Research*, 35(4), 653–661. doi:10.1080/00288330.2001.9517032

299 Nicholson, J. M., Mordaunt, M., Lopez, P., Uppala, A., Rosati, D., Rodrigues, N. P., ... Rife, S. C. (2021).  
300 *Scite: A smart citation index that displays the context of citations and classifies their intent using deep*  
301 *learning*. Cold Spring Harbor Laboratory. doi:10.1101/2021.03.15.435418

302 Oksanen, J., Blanchet, F. G., Kindt, R., Legendre, P., Minchin, P. R., O'Hara, R. B., ... Wagner, H. (2015).  
303 *Vegan: Community ecology package*. CRAN.

304 Ooms, J. (2021a). *Curl: A modern and flexible web client for r*. R package version 4.3.2. Retrieved from  
305 <https://CRAN.R-project.org/package=curl>

306 Ooms, J. (2021b). *Magick: Advanced graphics and image-processing in r*. R package version 2.7.3. Retrieved  
307 from <https://CRAN.R-project.org/package=magick>

308 Palumbi, S. R. (1996). Nucleic Acids II: The Polymerase Chain Reaction. In *Molecular Systematics* (Second,  
309 Vol. 2). Sunderland, Massachusetts: Sinauer Associates.

310 Pebesma, E. (2021). *Sf: Simple features for r*. R package version 1.0-2. Retrieved from [https://CRAN.R-](https://CRAN.R-project.org/package=sf)  
311 [project.org/package=sf](https://CRAN.R-project.org/package=sf)

312 Pebesma, E., & Bivand, R. (2021). *Sp: Classes and methods for spatial data*. R package version 1.4-5. Retrieved  
313 from <https://CRAN.R-project.org/package=sp>

314 Provoost, P., & Bosch, S. (2021). *Robis: Ocean biodiversity information system (obis) client*. R package version  
315 2.6.1. Retrieved from <https://github.com/iobis/robis>

316 R Core Development Team. (2019). R: A language and environment for statistical computing. R Foundation  
317 for Statistical Computing. Retrieved from <http://www.r-project.org/>.

318 Roberts, C. [CD], Stewart, A., Struthers, C., Barker, J., & Kortet, S. (2019). *Checklist of the fishes of new*  
319 *zealand* (No. July). Museum of New Zealand Te Papa Tongarewa. Series: Version 1.1 July 2019. Retrieved  
320 from <https://collections.tepapa.govt.nz/document/10564>

321 Roberts, C. [Clive] (Ed.). (2005). *Regional diversity and biogeography of coastal fishes on the west coast south*  
322 *island of new zealand*. Wellington, N.Z: Dept. of Conservation, 250.

323 Rosen, M. J., Callahan, B. J., Fisher, D. S., & Holmes, S. P. (2012). Denoising PCR-amplified metagenome  
324 data. *BMC Bioinformatics*, 13(1). ISBN: 1471-2105 (Electronic)\$\backslashbackslashr1471-2105 (Linking).  
325 doi:10/gb8vq2

326 Schauburger, P., & Walker, A. (2021). *Openxlsx: Read, write and edit xlsx files*. R package version 4.2.4.  
327 Retrieved from <https://CRAN.R-project.org/package=openxlsx>

- 328 Schnell, I. B., Bohmann, K., & Gilbert, M. T. P. (2015). Tag jumps illuminated - reducing sequence-to-  
329 sample misidentifications in metabarcoding studies. *Molecular Ecology Resources*, 15(6), 1289–1303.  
330 doi:10.1111/1755-0998.12402
- 331 Shaw, J. L. A., Clarke, L. J., Wedderburn, S. D., Barnes, T. C., Weyrich, L. S., & Cooper, A. (2016).  
332 Comparison of environmental DNA metabarcoding and conventional fish survey methods in a river  
333 system. *Biological Conservation*, 197, 131–138. doi:10.1016/j.biocon.2016.03.010
- 334 Sherrill-Mix, S. (2021). *Taxonomizr: Functions to work with ncbi accessions and taxonomy*. R package version  
335 0.8.0. Retrieved from <https://CRAN.R-project.org/package=taxonomizr>
- 336 Taberlet, P., Bonin, A., Zinger, L., & Coissac, E. (2018). *Environmental DNA: For biodiversity research and*  
337 *monitoring* (1st ed.). New York, NY: Oxford University Press.
- 338 Thomsen, P. F., Kielgast, J., Iversen, L. L., Møller, P. R., Rasmussen, M., & Willerslev, E. (2012). Detection  
339 of a Diverse Marine Fish Fauna Using Environmental DNA from Seawater Samples. *PLOS ONE*, 7(8),  
340 e41732. doi:10.1371/journal.pone.0041732
- 341 Valentini, A., Taberlet, P., Miaud, C., Civade, R., Herder, J., Thomsen, P. F., . . . Dejean, T. (2016). Next-  
342 generation monitoring of aquatic biodiversity using environmental DNA metabarcoding. *Molecular*  
343 *Ecology*, 25(4), 929–942. doi:10.1111/mec.13428
- 344 Ward, R. D., Zemlak, T. S., Innes, B. H., Last, P. R., & Hebert, P. D. (2005). DNA barcoding Australia’s fish  
345 species. *Philosophical Transactions of the Royal Society B: Biological Sciences*, 360(1462), 1847–1857.  
346 doi:10/c6vm58
- 347 Wickham, H. (2020). *Reshape2: Flexibly reshape data: A reboot of the reshape package*. R package version  
348 1.4.4. Retrieved from <https://github.com/hadley/reshape>
- 349 Wickham, H. (2021a). *Tidyr: Tidy messy data*. R package version 1.1.3. Retrieved from [https://CRAN.R-](https://CRAN.R-project.org/package=tidyr)  
350 [project.org/package=tidyr](https://CRAN.R-project.org/package=tidyr)
- 351 Wickham, H. (2021b). *Tidyverse: Easily install and load the tidyverse*. R package version 1.3.1. Retrieved  
352 from <https://CRAN.R-project.org/package=tidyverse>
- 353 Wickham, H., & Bryan, J. (2019). *Readxl: Read excel files*. R package version 1.3.1. Retrieved from [https:](https://CRAN.R-project.org/package=readxl)  
354 [//CRAN.R-project.org/package=readxl](https://CRAN.R-project.org/package=readxl)
- 355 Wickham, H., François, R., Henry, L., & Müller, K. (2021). *Dplyr: A grammar of data manipulation*. R  
356 package version 1.0.7. Retrieved from <https://CRAN.R-project.org/package=dplyr>
- 357 Wing, S. R., & Jack, L. (2013). Marine reserve networks conserve biodiversity by stabilizing communities and  
358 maintaining food web structure. *Ecosphere*, 4(11), art135. doi:10.1890/ES13-00257.1
- 359 Xie, Y. (2021a). *Knitr: A general-purpose package for dynamic report generation in r*. R package version 1.33.  
360 Retrieved from <https://yihui.org/knitr/>
- 361 Xie, Y. (2021b). *Xaringan: Presentation ninja*. R package version 0.22. Retrieved from [https://github.com/](https://github.com/yihui/xaringan)  
362 [yihui/xaringan](https://github.com/yihui/xaringan)

## 363 A Taxonomic observations



**Table 4:** Details on taxonomic observations across data sources. Taxonomic hierarchies conform with NCBI taxonomy, where available, and are sorted alphabetically – the resulting species order is identical to Fig. 2 of *main text*. Taxa not listed as New Zealand species in (CD Roberts et al., 2019) are highlighted with Asterisk (\*). Trivial names are indicated, where available from NCBI.

| Class            | Order          | Family       | Genus                         | Species                          | Common name                       | BRUV                       | eDNA | OBIS | Literature |      |
|------------------|----------------|--------------|-------------------------------|----------------------------------|-----------------------------------|----------------------------|------|------|------------|------|
| Actinopteri      | Anguilliformes | Anguillidae  | <i>Anguilla</i>               | <i>Anguilla australis</i>        | Australian shortfin eel           |                            | 1    |      |            |      |
|                  |                | Congridae    | <i>Conger</i>                 | <i>Conger verreauxi</i>          | conger eel                        |                            |      |      | TRUE       |      |
|                  | Atheriniformes | Atherinidae  | <i>Atherinomorus</i>          | <i>Atherinomorus lacunosus</i>   | hardyhead silverside              |                            |      |      | TRUE       |      |
|                  | Blenniiformes  | Gobiesocidae | <i>Gobiesox*</i>              | <i>Gobiesox maeandricus*</i>     | northern clingfish                |                            |      | 1    |            |      |
|                  |                |              | Tripterygiidae                | <i>Bellapiscis</i>               | <i>Bellapiscis lesleyae</i>       | mottled twister            |      |      |            | TRUE |
|                  |                |              |                               | <i>Bellapiscis medius</i>        | twister                           |                            |      |      | TRUE       |      |
|                  |                |              |                               | <i>Cryptichthys</i>              | <i>Cryptichthys jojettae</i>      |                            |      |      |            | TRUE |
|                  |                |              |                               | <i>Forsterygion</i>              | <i>Forsterygion capito</i>        | spotted robust triplefin   |      |      |            | TRUE |
|                  |                |              |                               |                                  | <i>Forsterygion flavonigrum</i>   | yellow-and-black triplefin |      |      | TRUE       | TRUE |
|                  |                |              |                               |                                  | <i>Forsterygion lapillum</i>      | common triplefin           |      |      |            | TRUE |
|                  |                |              |                               |                                  | <i>Forsterygion malcolmi</i>      |                            |      |      |            | TRUE |
|                  |                |              |                               |                                  | <i>Forsterygion maryannae</i>     |                            | 4    |      |            | TRUE |
|                  |                |              |                               |                                  | <i>Forsterygion varium</i>        | striped triplefin          |      |      |            | TRUE |
|                  |                |              |                               | <i>Helcogramma*</i>              | <i>Helcogramma striata*</i>       |                            |      |      | 6          |      |
|                  |                |              |                               | <i>Karalepis</i>                 | <i>Karalepis stewarti</i>         |                            |      |      |            | TRUE |
|                  |                |              |                               | <i>Notoclinops</i>               | <i>Notoclinops caerulepunctus</i> |                            |      |      |            | TRUE |
|                  |                |              |                               | <i>Notoclinops segmentatus</i>   |                                   |                            |      |      | TRUE       |      |
|                  |                |              | <i>Notoclinus</i>             | <i>Notoclinus compressus</i>     |                                   |                            |      |      | TRUE       |      |
|                  |                |              |                               | <i>Notoclinus fenestratus</i>    |                                   |                            |      |      | TRUE       |      |
|                  |                |              | <i>Ruanoho</i>                | <i>Ruanoho decemdigitatus</i>    |                                   |                            |      |      | TRUE       |      |
|                  |                |              | <i>Ruanoho whereo</i>         | spectacled triplefin             |                                   |                            |      | TRUE |            |      |
|                  | Carangiformes  | Carangidae   | <i>Trachurus</i>              | <i>Trachurus japonicus</i>       | Japanese jack mackerel            |                            |      |      | 1          |      |
| Centrarchiformes | Aplodactylidae |              | <i>Aplodactylus</i>           | <i>Aplodactylus arctidens</i>    |                                   | 2                          |      |      | TRUE       |      |
|                  |                |              | <i>Cheilodactylus</i>         | <i>Cheilodactylus variegatus</i> |                                   |                            |      | 7    |            |      |
|                  |                |              | <i>Cheilodactylus zonatus</i> | blackbarred morwong              |                                   |                            | 7    |      |            |      |
|                  |                |              | <i>Nemadactylus</i>           | <i>Nemadactylus macropterus</i>  | tarakihi                          | 14                         |      | TRUE | TRUE       |      |
|                  |                | Kyphosidae   | <i>Microcanthus*</i>          | <i>Microcanthus strigatus*</i>   | stripey                           |                            |      | 1    |            |      |

| Class (cont.) | Order (cont.)     | Family (cont.)      | Genus (cont.)          | Species (cont.)                     | Common name (cont.)      | BRUV (cont.) | eDNA (cont.) | OBIS (cont.) | Literature (cont.) |
|---------------|-------------------|---------------------|------------------------|-------------------------------------|--------------------------|--------------|--------------|--------------|--------------------|
|               |                   |                     | <i>Scorpis</i>         | <i>Scorpis lineolata</i>            | silver sweep             |              |              |              | TRUE               |
|               |                   | Latridae            | <i>Latridopsis</i>     | <i>Latridopsis ciliaris</i>         | blue moki                | 1            |              | TRUE         | TRUE               |
|               |                   |                     |                        | <i>Latridopsis forsteri</i>         | bastard trumpeter        |              |              |              | TRUE               |
|               |                   |                     | <i>Latris</i>          | <i>Latris lineata</i>               | striped trumpeter        |              |              | TRUE         | TRUE               |
|               |                   |                     | <i>Mendosoma</i>       | <i>Mendosoma lineatum</i>           |                          |              |              |              | TRUE               |
|               | Chaetodontiformes | Chaetodontidae      | <i>Chaetodon</i>       | <i>Chaetodon zanzibarensis</i>      |                          |              | 1            |              |                    |
|               | Cichliformes      | Cichlidae           | <i>Benitochromis</i> * | <i>Benitochromis finleyi</i> *      |                          |              | 1            |              |                    |
|               |                   |                     | <i>Coptodon</i> *      | <i>Coptodon zillii</i> *            | redbelly tilapia         |              | 2            |              |                    |
|               | Clupeiformes      | Engraulidae         | <i>Engraulis</i> *     | <i>Engraulis japonicus</i> *        | Japanese anchovy         |              | 1            |              |                    |
|               | Cypriniformes     | Cyprinidae          | <i>Phoxinus</i> *      | <i>Phoxinus sp.*</i>                |                          |              | 1            |              |                    |
|               | Gadiformes        | Gaidropsaridae      | <i>Gaidropsarus</i>    | <i>Gaidropsarus argentatus</i>      | Arctic rockling          |              | 1            |              |                    |
|               |                   |                     |                        | <i>Gaidropsarus novaezelandi</i>    |                          |              |              |              | TRUE               |
|               |                   | Merlucciidae        | <i>Macruronus</i>      | <i>Macruronus novaezelandiae</i>    | blue grenadier           |              | 1            |              |                    |
|               |                   | Moridae             | <i>Lotella</i>         | <i>Lotella phycis</i>               |                          |              | 2            |              |                    |
|               |                   |                     |                        | <i>Lotella rhacina</i>              | rock cod                 | 2            |              |              | TRUE               |
|               |                   |                     | <i>Pseudophycis</i>    | <i>Pseudophycis barbata</i>         | southern bastard codling | 1            |              | TRUE         | TRUE               |
|               | Galaxiiformes     | Galaxiidae          | <i>Galaxias</i>        | <i>Galaxias argenteus</i>           |                          |              |              | TRUE         |                    |
|               |                   |                     |                        | <i>Galaxias sp.</i>                 |                          |              | 4            |              |                    |
|               | Gobiesociformes   | Gobiesocidae        | <i>Modicus</i>         | <i>Modicus minimus</i>              |                          |              |              |              | TRUE               |
|               |                   |                     |                        | <i>Modicus tangaroa</i>             |                          |              |              |              | TRUE               |
|               | Gobiiformes       | Eleotridae          | <i>Bostrychus</i> *    | <i>Bostrychus zonatus</i> *         | barred gudgeon           |              | 8            |              |                    |
|               |                   | Gobiidae            | <i>Asterropteryx</i> * | <i>Asterropteryx semipunctata</i> * | starry goby              |              | 5            |              |                    |
|               |                   |                     | <i>Gobiopsis</i>       | <i>Gobiopsis atrata</i>             |                          |              |              |              | TRUE               |
|               |                   | Thalasseleotrididae | <i>Thalasseleotris</i> | <i>Thalasseleotris iota</i>         |                          |              |              | TRUE         |                    |
|               | Labriformes       | Labridae            | <i>Bodianus</i>        | <i>Bodianus unimaculatus</i>        | red pigfish              | 5            |              |              |                    |
|               |                   |                     | <i>Notolabrus</i>      | <i>Notolabrus celidotus</i>         | New Zealand spotty       | 5            |              | TRUE         | TRUE               |
|               |                   |                     |                        | <i>Notolabrus cinctus</i>           |                          | 4            |              | TRUE         | TRUE               |
|               |                   |                     |                        | <i>Notolabrus fucicola</i>          | yellow-saddled wrasse    | 1            |              | TRUE         | TRUE               |
|               |                   |                     | <i>Pseudolabrus</i>    | <i>Pseudolabrus miles</i>           |                          | 16           |              | TRUE         | TRUE               |
|               |                   | Odadidae            | <i>Odax</i>            | <i>Odax pullus</i>                  | greenbone                | 1            |              |              | TRUE               |

| Class (cont.) | Order (cont.)                | Family (cont.)         | Genus (cont.)                  | Species (cont.)                     | Common name (cont.)     | BRUV (cont.) | eDNA (cont.) | OBIS (cont.) | Literature (cont.) |      |      |
|---------------|------------------------------|------------------------|--------------------------------|-------------------------------------|-------------------------|--------------|--------------|--------------|--------------------|------|------|
|               | Lutjaniformes                | Lutjanidae             | <i>Lutjanus</i>                | <i>Lutjanus sanguineus</i>          | humphead snapper        |              | 1            |              |                    |      |      |
|               | Mugiliformes                 | Mugilidae              | <i>Aldrichetta</i>             | <i>Aldrichetta forsteri</i>         | yellow-eye mullet       |              | 2            |              | TRUE               |      |      |
|               | Myctophiformes               | Myctophidae            | <i>Gymnoscopelus*</i>          | <i>Gymnoscopelus nicholsi*</i>      |                         |              | 1            |              |                    |      |      |
|               |                              |                        |                                | <i>Hygophum</i>                     | <i>Hygophum hygomii</i> |              |              | 1            |                    |      |      |
|               | Ophidiiformes                | Bythitidae             | <i>Fiordichthys</i>            | <i>Fiordichthys slartibartfasti</i> |                         |              |              |              | TRUE               |      |      |
|               | Osmeriformes                 | Retropinnidae          | <i>Retropinna</i>              | <i>Retropinna retropinna</i>        | cucumberfish            |              |              |              | TRUE               |      |      |
|               | Ovalentaria                  | Plesiopidae            | <i>Acanthoclinus</i>           | <i>Acanthoclinus fuscus</i>         |                         |              |              |              | TRUE               |      |      |
|               |                              |                        |                                | <i>Acanthoclinus littoreus</i>      |                         |              |              |              |                    | TRUE |      |
|               |                              |                        |                                | <i>Acanthoclinus marilynae</i>      |                         |              |              |              |                    | TRUE |      |
|               |                              |                        |                                | <i>Acanthoclinus matti</i>          |                         |              |              |              |                    | TRUE |      |
|               |                              |                        |                                | <i>Acanthoclinus rua</i>            |                         |              |              |              | TRUE               |      |      |
|               | Pempheiformes                | Banjosidae             | <i>Banjos*</i>                 | <i>Banjos banjos*</i>               |                         |              | 6            |              |                    |      |      |
|               |                              | Percophidae            | <i>Hemerocoetes</i>            | <i>Hemerocoetes monopterygius</i>   |                         |              |              |              | TRUE               |      |      |
|               |                              | Polyprionidae          | <i>Polyprion</i>               | <i>Polyprion oxygeneios</i>         |                         |              |              |              | TRUE               |      |      |
|               | Perciformes                  | Bovichtidae            | <i>Bovichtus*</i>              | <i>Bovichtus diacanthus*</i>        |                         |              | 1            |              |                    |      |      |
|               |                              |                        |                                | <i>Bovichtus variegatus*</i>        | thornfish               |              |              |              |                    | TRUE |      |
|               |                              | Callanthiidae          | <i>Callanthias</i>             | <i>Callanthias allporti</i>         |                         |              |              |              |                    | TRUE |      |
|               |                              |                        |                                | <i>Callanthias japonicus</i>        |                         |              |              | 1            |                    |      |      |
|               |                              | Nototheniidae          | <i>Notothenia</i>              | <i>Notothenia angustata</i>         | Maori chief             |              |              |              | TRUE               |      |      |
|               |                              | Percidae               | <i>Sander*</i>                 | <i>Sander lucioperca*</i>           | pikeperch               |              |              | 1            |                    |      |      |
|               |                              | Scorpaenidae           | <i>Scorpaena</i>               | <i>Scorpaena cardinalis</i>         | red rock cod            |              | 1            |              |                    |      |      |
|               |                              |                        |                                | <i>Scorpaena papillosa</i>          |                         |              |              |              |                    | TRUE | TRUE |
|               |                              |                        |                                | <i>Scorpaena pepo</i>               | pumpkin scorpionfish    |              |              |              | 1                  |      |      |
|               |                              | Sebastidae             | <i>Helicolenus</i>             | <i>Helicolenus hilgendorfi</i>      |                         |              |              |              |                    |      |      |
|               | <i>Helicolenus percoides</i> |                        |                                |                                     |                         |              | 6            |              |                    | TRUE |      |
|               | Serranidae                   | <i>Caesioperca</i>     | <i>Caesioperca lepidoptera</i> |                                     |                         |              | 8            |              | TRUE               | TRUE |      |
|               |                              |                        | <i>Caprodon*</i>               | <i>Caprodon schlegelii*</i>         | sunrise perch           |              |              |              | 27                 |      |      |
|               |                              |                        | <i>Hypoplectrodes</i>          | <i>Hypoplectrodes huntii</i>        |                         |              |              | 2            |                    |      | TRUE |
|               |                              | <i>Lepidoperca</i>     | <i>Lepidoperca tasmanica</i>   |                                     |                         |              |              |              | TRUE               | TRUE |      |
|               | Triglidae                    | <i>Chelidonichthys</i> | <i>Chelidonichthys kumu</i>    | bluefin gurnard                     |                         |              | 1            |              |                    |      |      |

| Class (cont.)  | Order (cont.)      | Family (cont.)  | Genus (cont.)           | Species (cont.)                  | Common name (cont.)          | BRUV (cont.) | eDNA (cont.) | OBIS (cont.) | Literature (cont.) |
|----------------|--------------------|-----------------|-------------------------|----------------------------------|------------------------------|--------------|--------------|--------------|--------------------|
|                |                    |                 |                         | <i>Chelidonichthys spinosus</i>  | red gurnard                  |              | 1            |              |                    |
|                | Pleuronectiformes  | Rhombosoleidae  | <i>Peltorhamphus</i>    | <i>Peltorhamphus latus</i>       | speckled sole                |              |              | TRUE         |                    |
|                |                    |                 | <i>Rhombosolea</i>      | <i>Rhombosolea plebeia</i>       | New Zealand flounder         |              |              |              | TRUE               |
|                | Salmoniformes      | Salmonidae      | <i>Oncorhynchus</i>     | <i>Oncorhynchus mykiss</i>       | rainbow trout                |              | 1            |              |                    |
|                | Scombriformes      | Gempylidae      | <i>Thyrsites</i>        | <i>Thyrsites atun</i>            | snoek                        | 1            |              |              | TRUE               |
|                |                    | Scombridae      | <i>Katsuwonus</i>       | <i>Katsuwonus pelamis</i>        | skipjack tuna                |              | 1            |              |                    |
|                |                    |                 | <i>Scomber</i>          | <i>Scomber japonicus</i>         | chub mackerel                |              | 1            |              |                    |
|                | Stomiiformes       | Sternoptychidae | <i>Maurolicus</i>       | <i>Maurolicus muelleri</i>       | pearlsides                   |              | 9            |              |                    |
|                | Tetraodontiformes  | Monacanthidae   | <i>Meuschenia</i>       | <i>Meuschenia scaber</i>         | velvet leatherjacket         | 6            |              | TRUE         | TRUE               |
|                |                    |                 | <i>Scobinichthys*</i>   | <i>Scobinichthys granulatus*</i> | rough leatherjacket          |              | 11           |              |                    |
|                | Trachichthyiformes | Monocentridae   | <i>Monocentris</i>      | <i>Monocentris japonicus</i>     |                              |              | 2            |              |                    |
|                |                    | Trachichthyidae | <i>Paratrachichthys</i> | <i>Paratrachichthys trailli</i>  | sandpaper fish               |              |              |              | TRUE               |
|                | undefined          | Opistognathidae | <i>Opistognathus*</i>   | <i>Opistognathus iyonis*</i>     |                              |              | 3            |              |                    |
|                |                    |                 |                         | <i>Opistognathus liturus*</i>    | seto-amadai                  |              | 2            |              |                    |
|                |                    |                 |                         | <i>Opistognathus punctatus*</i>  | finespotted jawfish          |              | 1            |              |                    |
|                |                    |                 |                         | <i>Opistognathus sp.*</i>        |                              |              | 1            |              |                    |
|                | Uranoscopiformes   | Pinguipedidae   | <i>Parapercis</i>       | <i>Parapercis colias</i>         | New Zealand blue cod         | 21           |              | TRUE         | TRUE               |
|                |                    |                 |                         | <i>Parapercis decemfasciata</i>  |                              |              | 10           |              |                    |
|                |                    |                 |                         | <i>Parapercis gilliesii</i>      | yellow weaver                |              |              |              | TRUE               |
| Chondrichthyes | Carcharhiniformes  | Carcharhinidae  | <i>Prionace</i>         | <i>Prionace glauca</i>           | blue shark                   |              |              | TRUE         |                    |
|                |                    | Scyliorhinidae  | <i>Cephaloscyllium</i>  | <i>Cephaloscyllium isabellum</i> |                              | 4            |              |              | TRUE               |
|                |                    | Triakidae       | <i>Galeorhinus</i>      | <i>Galeorhinus galeus</i>        | tope shark                   | 2            |              |              |                    |
|                |                    |                 | <i>Mustelus</i>         | <i>Mustelus lenticulatus</i>     | spotted estuary smooth-hound | 1            |              |              |                    |
|                |                    |                 |                         | <i>Mustelus manazo</i>           | starspotted smooth-hound     |              | 1            |              |                    |
|                | Hexanchiformes     | Hexanchidae     | <i>Notorynchus</i>      | <i>Notorynchus cepedianus</i>    | broadnose sevengill shark    | 2            | 1            |              |                    |
|                | Lamniformes        | Alopiidae       | <i>Carcharodon</i>      | <i>Carcharodon carcharias</i>    | great white shark            |              |              | TRUE         |                    |
|                |                    |                 | <i>Isurus</i>           | <i>Isurus paucus</i>             | shortfin mako shark          |              |              | TRUE         |                    |
|                | Squaliformes       | Squalidae       | <i>Squalus</i>          | <i>Squalus acanthias</i>         | spiny dogfish                | 2            |              | TRUE         | TRUE               |
|                |                    |                 |                         | <i>Squalus suckleyi</i>          | Puget Sound dogfish          |              | 3            |              |                    |
